# Supplementary material
Source: PubMed Central journal article supplement (PMC2693207)
Supplement: NIHMS38686-supplement-01.pdf [file NIHMS38686-supplement-01.pdf]

**Supplementary Table 1. Summary of cluster analysis and transcription factor analysis (unique transcripts)**

| Cluster | Affy ID            | Symbol     | Description                                                                        | 10ppb | 40ppb | 100ppb | AHRE | ERE |
|---------|--------------------|------------|------------------------------------------------------------------------------------|-------|-------|--------|------|-----|
| 1       | Dr.8215.1.A1_at    | sox21a     | SRY-box containing gene 21a                                                        | -2.33 | -1.32 | -1.00  | Y    | Y   |
| 1       | Dr.7110.1.S1_at    | zgc:77614  | zgc:77059                                                                          | -3.04 | -2.42 | -7.29  | Y    | Y   |
| 1       | Dr.6147.1.A1_at    | zgc:77150  | zgc:76913                                                                          | -2.95 | -1.70 | -4.17  | Y    | Y   |
| 1       | Dr.2978.1.S1_at    | vg3        | vitellogenin 3, phosphatidylesterase                                               | -6.65 | -1.67 | -1.79  | Y    | Y   |
| 1       | Dr.25593.2.A1_at   | wu:fa56g11 | wu:fa56g11                                                                         | -3.90 | -1.03 | -1.20  | Y    | Y   |
| 1       | Dr.25285.1.S1_at   | zgc:73223  | zgc:73223                                                                          | -2.47 | -1.15 | -1.11  | Y    | Y   |
| 1       | Dr.25009.4.A1_at   | wu:fb59c05 | wu:fb59c05                                                                         | -7.93 | -1.73 | -2.05  | Y    | Y   |
|         |                    |            | Kreisler (mouse) maf-related leucine zipper                                        |       |       |        |      |     |
| 1       | Dr.23470.1.S1_s_at | krml2.2    | homolog 2.2                                                                        | -3.67 | -1.02 | -2.68  | Y    | Y   |
| 1       | Dr.18893.1.S1_at   | im:7138745 | im:7138745                                                                         | -2.73 | -1.06 | 1.01   | Y    | Y   |
| 1       | Dr.16681.1.A1_at   |            | NA                                                                                 | -2.17 | 1.07  | 1.47   | Y    | Y   |
| 1       | Dr.11971.1.A1_at   | zgc:92317  | zgc:91877                                                                          | -2.34 | -1.06 | -1.46  | Y    | Y   |
| 1       | Dr.921.1.A1_at     | timeless   | timeless homolog (Drosophila)                                                      | -2.92 | 1.88  | 1.07   | Y    |     |
| 1       | Dr.8090.1.A1_at    | ndrg1l     | N-myc downstream regulated gene 1, like<br>procollagen-lysine 1, 2-oxoglutarate 5- | -3.58 | 1.33  | -1.93  | Y    |     |
| 1       | Dr.7688.1.A1_at    | plod1      | dioxygenase 1                                                                      | -2.24 | 1.00  | -1.43  | Y    |     |
| 1       | Dr.25774.1.S1_at   |            | NA                                                                                 | -3.06 | -1.59 | -1.94  | Y    |     |
| 1       | Dr.25498.1.S1_at   | bzw1       | basic leucine zipper and W2 domains 1                                              | -2.15 | 1.43  | 1.18   | Y    |     |
| 1       | Dr.25009.6.A1_a_at | vg1        | vitellogenin 1                                                                     | -7.38 | -1.62 | -1.83  | Y    |     |
| 1       | Dr.24920.1.S1_at   |            | NA                                                                                 | -2.56 | -1.13 | -1.36  | Y    |     |
| 1       | Dr.24253.1.S1_at   | stk3       | serine/threonine kinase 3 (STE20 homolog,                                          | -3.84 | 1.86  | -1.83  | Y    |     |
| 1       | Dr.20140.1.A1_at   | E2F4       | NA                                                                                 | -2.60 | -1.64 | -1.50  | Y    |     |
| 1       | Dr.1991.1.A1_s_at  | zgc:66417  | zgc:66417                                                                          | -7.09 | -1.19 | -5.92  | Y    |     |
| 1       | Dr.195.1.S2_at     | ck2a1      | casein kinase 2 alpha 1                                                            | -3.29 | -1.04 | -1.86  | Y    |     |
| 1       | Dr.18466.1.A1_at   |            | NA                                                                                 | -2.23 | 1.03  | -1.56  | Y    |     |
| 1       | Dr.17776.1.A1_at   | tph1l      | tryptophan hydroxylase 1, like                                                     | -2.64 | -1.53 | 1.19   | Y    |     |
| 1       | Dr.17113.1.A1_a_at | ptena      | phosphatase and tensin homolog A                                                   | -2.32 | 1.51  | 1.38   | Y    |     |
| 1       | Dr.13994.2.A1_a_at | zgc:101086 | zgc:101086                                                                         | -2.37 | -1.20 | -1.67  | Y    |     |
| 1       | Dr.13775.1.S1_at   |            | NA                                                                                 | -3.60 | -1.20 | -1.50  | Y    |     |
| 1       | Dr.12714.1.A1_at   |            | NA                                                                                 | -5.65 | -1.56 | -1.01  | Y    |     |
| 1       | Dr.10170.1.A1_at   |            | NA                                                                                 | -2.38 | -1.23 | -1.64  | Y    |     |
| 1       | Dr.4412.13.A1_x_at | wu:fa56g11 | wu:fa56g11                                                                         | -2.92 | 1.16  | -1.13  |      | Y   |
| 1       | Dr.16504.1.A1_at   |            | NA                                                                                 | -2.60 | -1.33 | -1.90  |      | Y   |
| 1       | Dr.16380.1.A1_at   | zgc:92068  | zgc:86738                                                                          | -2.45 | -1.26 | -1.18  |      | Y   |
| 1       | Dr.4412.12.A1_at   | wu:fa56g11 | wu:fa56g11                                                                         | -3.55 | -1.05 | -1.32  |      |     |
| 1       | Dr.25593.1.S1_at   | wu:fa56g11 | wu:fa56g11                                                                         | -2.80 | 1.30  | 1.06   |      |     |
| 1       | Dr.13096.2.S1_at   | zgc:86738  | zgc:77882                                                                          | -3.95 | 1.18  | -1.89  |      |     |
| 2       | Dr.9682.1.A1_at    |            | NA                                                                                 | -4.11 | -4.33 | -3.91  | Y    | Y   |

**Supplementary Table 1 (cont.). Summary of cluster analysis and transcription factor analysis (unique transcripts)**

| Cluster | Affy ID            | Symbol     | Description                                               | 10ppb | 40ppb | 100ppb | AHRE | ERE |
|---------|--------------------|------------|-----------------------------------------------------------|-------|-------|--------|------|-----|
| 2       | Dr.956.1.S1_at     | wu:fa92g05 | wu:fa92g05                                                | -1.17 | -1.36 | -2.22  | Y    | Y   |
| 2       | Dr.913.1.S1_at     | zgc:63909  | zgc:63909                                                 | -2.60 | -1.62 | -2.69  | Y    | Y   |
| 2       | Dr.8723.1.S1_at    | zgc:92903  | zgc:92068                                                 | -1.21 | -1.61 | -3.77  | Y    | Y   |
| 2       | Dr.7626.1.A1_at    | zgc:73257  | zgc:73257                                                 | -2.25 | -1.15 | -2.18  | Y    | Y   |
| 2       | Dr.7236.1.A1_at    | wu:fc31g04 | wu:fc31g04                                                | -2.90 | -1.25 | -2.87  | Y    | Y   |
| 2       | Dr.5853.1.A1_at    | zgc:77059  | zgc:76953                                                 | -2.38 | -1.03 | -1.02  | Y    | Y   |
| 2       | Dr.4387.1.S1_at    | krt4       | keratin 4                                                 | -1.96 | -2.93 | -5.65  | Y    | Y   |
| 2       | Dr.4249.1.S1_at    | lipf       | lipase, gastric                                           | -2.06 | -1.85 | -2.30  | Y    | Y   |
| 2       | Dr.4212.1.S1_at    | ldha       | lactate dehydrogenase A4                                  | -1.78 | -1.45 | -2.59  | Y    | Y   |
| 2       | Dr.25155.1.S1_s_at | ba1        | ba1 globin                                                | -1.11 | 1.22  | -2.50  | Y    | Y   |
| 2       | Dr.24233.1.S1_at   | fn1b       | fibronectin 1b                                            | -1.03 | -1.57 | -2.69  | Y    | Y   |
| 2       | Dr.24122.1.A1_at   | zgc:77882  | zgc:77614                                                 | -2.49 | -2.05 | -2.06  | Y    | Y   |
| 2       | Dr.20722.1.S1_at   | zgc:56454  | zgc:56454                                                 | -2.14 | -1.43 | -2.95  | Y    | Y   |
| 2       | Dr.16206.1.A1_s_at | wu:fo83d04 | NA                                                        | 1.26  | 1.65  | 1.23   | Y    | Y   |
| 2       | Dr.1619.1.A1_at    | wu:fb83a09 | wu:fb83a09                                                | -3.44 | -1.98 | -2.03  | Y    | Y   |
| 2       | Dr.15054.1.S1_at   | rbp2a      | retinol binding protein 2a, cellular                      | -2.98 | -2.39 | -4.54  | Y    | Y   |
| 2       | Dr.13689.1.S1_at   | zgc:66449  | zgc:66449                                                 | -2.65 | -1.76 | -1.90  | Y    | Y   |
| 2       | Dr.1260.1.S1_at    | anxa2a     | annexin A2a                                               | -2.42 | -2.92 | -4.84  | Y    | Y   |
| 2       | Dr.12575.1.S1_at   | dcp1a      | decapping enzyme                                          | -1.12 | -1.10 | -2.16  | Y    | Y   |
| 2       | Dr.10326.1.S1_at   | junb       | jun B proto-oncogene                                      | -2.21 | -1.88 | -4.39  | Y    | Y   |
| 2       | Dr.890.1.S1_at     | zgc:77517  | zgc:77150                                                 | -2.69 | -1.18 | -1.53  | Y    |     |
| 2       | Dr.8045.1.S1_at    | prtfcd1    | phosphoribosyl transferase domain containing              | -1.44 | -1.12 | -3.05  | Y    |     |
| 2       | Dr.59.1.S1_at      | anxa1a     | annexin A1a                                               | -2.20 | -3.36 | -7.06  | Y    |     |
| 2       | Dr.3628.1.S1_at    | rap1b      | RAS related protein 1b                                    | -1.79 | -1.41 | -2.40  | Y    |     |
| 2       | Dr.3512.1.A1_at    |            | NA                                                        | -1.86 | -1.34 | -2.26  | Y    |     |
| 2       | Dr.3459.1.S1_at    | cd163      | Cd63 antigen                                              | -2.04 | -1.47 | -3.70  | Y    |     |
| 2       | Dr.3180.1.A1_at    | zgc:76913  | zgc:76908                                                 | -1.84 | -2.40 | -2.50  | Y    |     |
| 2       | Dr.2363.1.S1_at    | tagln2     | transgelin 2                                              | -2.93 | -2.27 | -2.21  | Y    |     |
| 2       | Dr.20815.3.A1_at   | lgals3l    | lectin, galactoside-binding, soluble, 3 (galectin 3)-like | -1.89 | -2.68 | -2.56  | Y    |     |
| 2       | Dr.20277.1.A1_at   | acta2      | actin, alpha 2, smooth muscle, aorta                      | -1.83 | -1.27 | -2.65  | Y    |     |
| 2       | Dr.18135.1.A1_at   | wu:fl63a03 | wu:fl63a03                                                | -1.07 | 1.07  | -4.01  | Y    |     |
| 2       | Dr.17850.1.S1_at   | zgc:56592  | zgc:56592                                                 | -2.61 | -2.05 | -3.41  | Y    |     |
| 2       | Dr.15930.1.A1_at   |            | NA                                                        | -1.51 | -1.03 | -2.18  | Y    |     |
| 2       | Dr.15856.1.A1_at   |            | NA                                                        | -2.66 | -1.10 | -2.12  | Y    |     |
| 2       | Dr.14748.1.S1_at   | zgc:63985  | zgc:63985                                                 | -1.54 | -1.52 | -2.65  | Y    |     |
| 2       | Dr.14041.1.S1_at   | zgc:103597 | zgc:103597                                                | -2.65 | -1.91 | -1.97  | Y    |     |
| 2       | Dr.1377.1.A1_at    | col1a2     | collagen, type I, alpha 2                                 | -2.47 | -1.44 | -2.56  | Y    |     |

**Supplementary Table 1 (cont.). Summary of cluster analysis and transcription factor analysis (unique transcripts)**

| Cluster | Affy ID            | Symbol     | Description                                        | 10ppb | 40ppb | 100ppb | AHRE | ERE |
|---------|--------------------|------------|----------------------------------------------------|-------|-------|--------|------|-----|
| 2       | Dr.1372.1.S1_at    | krt18      | keratin 18                                         | -1.43 | -1.76 | -3.09  | Y    |     |
| 2       | Dr.1361.1.S1_at    | wu:fa98f12 | wu:fa98f12                                         | -1.91 | -2.41 | -4.90  | Y    |     |
| 2       | Dr.1282.1.S1_at    | krt8       | keratin 8                                          | -1.45 | -1.89 | -3.02  | Y    |     |
| 2       | Dr.1246.1.S1_at    | apoeb      | apolipoprotein Eb                                  | -1.83 | -1.09 | -4.12  | Y    |     |
| 2       | Dr.12106.1.S1_at   | lztfl1     | leucine zipper transcription factor-like 1         | -1.12 | -1.12 | -2.33  | Y    |     |
| 2       | Dr.1201.1.S1_at    | zgc:56142  | zgc:56142                                          | -2.46 | -1.92 | -3.71  | Y    |     |
| 2       | Dr.11609.1.S1_at   | LOC402847  |                                                    | -1.62 | -1.54 | -2.86  | Y    |     |
| 2       | Dr.11348.1.S1_at   | zgc:86724  | zgc:77517                                          | -3.04 | -2.42 | -7.29  | Y    |     |
| 2       | Dr.10879.1.A1_at   | wu:fe14f11 | wu:fe14f11                                         | -1.82 | -1.12 | -2.38  | Y    |     |
| 2       | Dr.10314.1.S1_a_at | mmp13      | matrix metalloproteinase 13                        | 1.20  | 1.60  | -2.51  | Y    |     |
| 2       | AFFX-Dr-GAPDH-3_at |            |                                                    |       |       |        | Y    |     |
| 2       | Dr.4048.1.S1_at    |            | NA                                                 | -2.15 | -1.26 | -3.36  |      | Y   |
| 2       | Dr.2973.1.A1_at    |            | NA                                                 | -1.49 | -2.39 | -1.77  |      | Y   |
| 2       | Dr.24341.1.S1_at   | zgc:76953  | zgc:76908                                          | -1.54 | -1.10 | -2.39  |      | Y   |
| 2       | Dr.1411.1.S1_at    | hbaa1      | hemoglobin alpha adult-1                           | -1.10 | 1.27  | -2.64  |      | Y   |
|         |                    |            | Kreisler (mouse) maf-related leucine zipper        |       |       |        |      |     |
| 2       | Dr.8198.1.A1_at    | krml2      | homolog 2                                          | -2.59 | -1.19 | -2.41  |      |     |
| 2       | Dr.5809.1.A1_at    | wu:fb11g12 | wu:fb11g12                                         | -2.30 | -1.57 | -7.28  |      |     |
| 2       | Dr.5513.1.S1_at    | slc3a2     | solute carrier family 3, member 2                  | -2.35 | -1.68 | -3.05  |      |     |
| 2       | Dr.23469.1.S1_s_at | wu:fj17g12 | wu:fj17g12                                         | -2.30 | -2.50 | -2.56  |      |     |
| 2       | Dr.18880.1.A1_at   |            | NA                                                 | -2.05 | -1.26 | -2.13  |      |     |
| 2       | Dr.16206.1.A1_at   | wu:fo83d04 | wu:fo83d04                                         | -1.22 | -1.06 | -6.09  |      |     |
| 2       | Dr.13510.1.S1_at   | actr10     | actin-related protein 10 homolog (S. cerevisiae)   | -1.80 | -1.23 | -2.29  |      |     |
| 2       | Dr.12498.1.S1_at   | rad1       | RAD1 homolog (S. pombe)                            | -1.10 | 1.13  | -2.16  |      |     |
| 2       | Dr.1194.1.S1_at    | zgc:76908  | zgc:76908                                          | -2.34 | -1.85 | -3.53  |      |     |
| 3       | Dr.8390.1.S1_at    | zgc:55420  | zgc:55420                                          | 3.84  | -1.12 | 1.13   | Y    | Y   |
| 3       | Dr.728.4.S1_at     | fgb        | fibrinogen, B beta polypeptide                     | 5.66  | 1.43  | 1.61   | Y    | Y   |
| 3       | Dr.6550.1.A1_at    | LOC407646  |                                                    | 3.05  | 1.42  | -1.09  | Y    | Y   |
| 3       | Dr.4797.1.S1_at    |            | NA                                                 | 8.50  | -1.19 | 1.20   | Y    | Y   |
| 3       | Dr.3581.1.S1_at    | ctrb1      | chymotrypsinogen B1                                | 2.58  | 1.84  | -2.41  | Y    | Y   |
| 3       | Dr.3025.3.S1_at    | wu:fa04f09 | wu:fa04f09                                         | 17.52 | 1.37  | 2.04   | Y    | Y   |
| 3       | Dr.25379.1.S1_at   | sb:cb37    | sb:cb37                                            | 5.19  | 1.73  | 1.80   | Y    | Y   |
| 3       | Dr.2426.1.S1_at    | zgc:66321  | zgc:66321                                          | 5.00  | -1.34 | -1.29  | Y    | Y   |
|         |                    |            | serine (or cysteine) proteinase inhibitor, clade A |       |       |        |      |     |
| 3       | Dr.1605.1.S1_at    | serpina1   | (alpha-1 antiproteinase, antitrypsin), member 1    | 29.44 | 1.51  | 3.07   | Y    | Y   |
| 3       | Dr.8587.1.A2_at    | igfbp1     | insulin-like growth factor binding protein 1       | 5.58  | -1.38 | -1.47  | Y    |     |
| 3       | Dr.5462.1.S1_at    | fgb        | fibrinogen, B beta polypeptide                     | 12.80 | -1.82 | -1.35  | Y    |     |
| 3       | Dr.4907.1.S1_at    | fgg        | fibrinogen, gamma polypeptide                      | 12.96 | -1.66 | -1.12  | Y    |     |

**Supplementary Table 1 (cont.). Summary of cluster analysis and transcription factor analysis (unique transcripts)**

| Cluster | Affy ID              | Symbol            | Description                               | 10ppb | 40ppb | 100ppb | AHRE | ERE |
|---------|----------------------|-------------------|-------------------------------------------|-------|-------|--------|------|-----|
| 3       | Dr.3613.1.S1_at      | cp                | ceruloplasmin                             | 24.49 | 1.06  | 2.16   | Y    |     |
| 3       | Dr.20270.1.S1_at     | wu:fi20c07        | wu:fi20c07                                | 12.95 | -1.13 | 1.33   | Y    |     |
| 3       | Dr.1889.2.A1_a_at    | tfa               | transferrin-a                             | 11.64 | -2.09 | -1.32  | Y    |     |
| 3       | Dr.5562.1.S1_at      | si:ch211-219i10.1 | si:ch211-219i10.1                         | 16.55 | 1.24  | 1.12   |      |     |
| 3       | Dr.1889.1.S1_at      | tfa               | transferrin-a                             | 9.49  | -2.25 | -1.42  |      |     |
| 4       | Dr.7806.1.A1_at      |                   | NA                                        | -2.44 | 1.04  | 2.65   | Y    | Y   |
| 4       | Dr.26469.1.S1_at     | sp4               | sp4 transcription factor                  | 1.51  | 2.32  | 1.96   | Y    | Y   |
| 4       | Dr.16524.1.S1_at     | wu:fc12b04        | wu:fc12b04                                | 1.85  | 2.39  | 2.05   | Y    | Y   |
| 4       | Dr.13972.1.S1_at     | zgc:64114         | zgc:64114                                 | 1.19  | 2.45  | 4.16   | Y    | Y   |
| 4       | Dr.13182.1.A1_at     | rab5b             | RAB5B, member RAS oncogene family         | 2.45  | 1.34  | 2.13   | Y    | Y   |
| 4       | Dr.12833.1.A1_at     | zgc:64213         | zgc:64213                                 | -1.62 | 1.18  | 3.28   | Y    | Y   |
| 4       | Dr.1192.1.S1_at      | wu:fb11h03        | wu:fb11h03                                | -1.60 | -1.17 | 3.48   | Y    | Y   |
| 4       | Dr.9478.1.S1_at      | cyp1a             | cytochrome P450, family 1, subfamily A    | 6.93  | 14.87 | 24.68  | Y    |     |
| 4       | Dr.9450.1.A1_at      | zgc:63724         | zgc:63724                                 | -1.46 | 1.74  | 3.59   | Y    |     |
| 4       | Dr.19990.1.S1_at     | zgc:66101         | zgc:66101                                 | 1.57  | 1.55  | 2.43   | Y    |     |
| 4       | Dr.19877.1.S1_at     | zgc:66133         | zgc:66133                                 | 1.72  | 2.17  | 3.31   | Y    |     |
| 4       | Dr.17662.1.S1_at     |                   | NA                                        | 1.88  | 3.38  | 1.62   | Y    |     |
| 4       | Dr.15418.1.S1_at     | wu:fc23f06        | wu:fc23f06                                | 1.26  | 1.27  | 3.01   | Y    |     |
| 4       | AFFX-Dr-acta1-5_x_at |                   |                                           |       |       |        | Y    |     |
| 4       | Dr.24858.1.S1_at     | zgc:110540        | zgc:110540                                | 1.37  | 2.56  | 1.97   |      |     |
| 4       | Dr.15555.1.S1_at     |                   | NA                                        | 1.48  | 2.58  | 2.72   |      |     |
| 4       | Dr.1192.1.S1_a_at    | wu:fb11h03        | wu:fb11h03                                | -2.96 | -1.56 | 2.95   |      |     |
| 5       | Dr.26139.1.A1_x_at   | NA                | NA                                        | 1.36  | 2.17  | -1.07  | Y    | Y   |
| 5       | Dr.25378.1.A1_at     | zgc:110540        | zgc:110540                                | 1.64  | 2.32  | 1.48   | Y    | Y   |
| 5       | Dr.24249.1.S1_at     | zc3hdc5           | zinc finger CCCH type domain containing 5 | 1.60  | 1.54  | 1.02   | Y    | Y   |
| 5       | Dr.5002.1.A1_at      | NA                | NA                                        | 1.74  | 2.33  | 1.78   | Y    |     |
| 5       | Dr.25086.1.A1_at     | NA                | NA                                        | 1.43  | 1.30  | 1.03   | Y    |     |
| 5       | Dr.1368.7.S1_at      | zgc:86724         | zgc:86724                                 | 1.26  | 1.38  | 1.30   | Y    |     |
