# Supplementary material
Source: PubMed Central journal article supplement (PMC2693207)
Supplement: NIHMS38686-supplement-02.pdf [file NIHMS38686-supplement-02.pdf]

Supplementary Table 2. Location of putative AHRES

| Gene ID            | Transcript ID      | Affy IDs                                        | Symbol                                                       | Description                                                                                   | Start | End   | Strand | Sequence |
|--------------------|--------------------|-------------------------------------------------|--------------------------------------------------------------|-----------------------------------------------------------------------------------------------|-------|-------|--------|----------|
| ENSDARG00000000935 | ENSDART0000001053  | Dr.24249.1.S1_at                                | zc3hd5                                                       | zinc finger CCCH type domain containing 5 [Source:RefSeq_peptide;Acc:NP_956530]               | -4874 | -4869 | -1     | agcgtg   |
| ENSDARG00000000935 | ENSDART0000001053  | Dr.24249.1.S1_at                                | zc3hd5                                                       | zinc finger CCCH type domain containing 5 [Source:RefSeq_peptide;Acc:NP_956530]               | -2211 | -2206 | -1     | tcgctg   |
| ENSDARG00000000935 | ENSDART0000001053  | Dr.24249.1.S1_at                                | zc3hd5                                                       | zinc finger CCCH type domain containing 5 [Source:RefSeq_peptide;Acc:NP_956530]               | 210   | 215   | -1     | tcgctg   |
| ENSDARG00000000935 | ENSDART0000001053  | Dr.24249.1.S1_at                                | zc3hd5                                                       | zinc finger CCCH type domain containing 5 [Source:RefSeq_peptide;Acc:NP_956530]               | 748   | 753   | -1     | agcgtg   |
| ENSDARG00000001953 | ENSDART00000003247 | Dr.7626.1.A1_at,Dr.7626.2.S1_at                 | NP_998562.1                                                  | zgc:73257 [Source:RefSeq_peptide;Acc:NP_998562]                                               | -1683 | -1678 | -1     | tcgctg   |
| ENSDARG00000001953 | ENSDART00000003247 | Dr.7626.1.A1_at,Dr.7626.2.S1_at                 | NP_998562.1                                                  | zgc:73257 [Source:RefSeq_peptide;Acc:NP_998562]                                               | -1087 | -1082 | -1     | ggcgtg   |
| ENSDARG00000001953 | ENSDART00000003247 | Dr.7626.1.A1_at,Dr.7626.2.S1_at                 | NP_998562.1                                                  | zgc:73257 [Source:RefSeq_peptide;Acc:NP_998562]                                               | -862  | -857  | -1     | agcgtg   |
| ENSDARG00000002953 | ENSDART00000003247 | Dr.7626.1.A1_at,Dr.7626.2.S1_at                 | NP_998562.1                                                  | zgc:73257 [Source:RefSeq_peptide;Acc:NP_998562]                                               | -347  | -342  | -1     | tcgctg   |
| ENSDARG00000002082 | ENSDART00000005010 | Dr.195.1.S1_at,Dr.195.1.S2_at,Dr.195.1.S1_at    | ck2a1                                                        | casein kinase 2 alpha 1 [Source:RefSeq_peptide;Acc:NP_571327]                                 | -983  | -978  | 1      | agcgtg   |
| ENSDARG00000002082 | ENSDART00000005010 | Dr.195.1.S1_at,Dr.195.1.S2_at,Dr.195.1.S1_at    | ck2a1                                                        | casein kinase 2 alpha 1 [Source:RefSeq_peptide;Acc:NP_571327]                                 | -941  | -936  | 1      | cgcgtg   |
| ENSDARG00000002082 | ENSDART00000005010 | Dr.195.1.S1_at,Dr.195.1.S2_at,Dr.195.1.S1_at    | ck2a1                                                        | casein kinase 2 alpha 1 [Source:RefSeq_peptide;Acc:NP_571327]                                 | -846  | -841  | -1     | tcgctg   |
| ENSDARG00000002082 | ENSDART00000005010 | Dr.195.1.S1_at,Dr.195.1.S2_at,Dr.195.1.S1_at    | ck2a1                                                        | casein kinase 2 alpha 1 [Source:RefSeq_peptide;Acc:NP_571327]                                 | -726  | -721  | 1      | ggcgtg   |
| ENSDARG00000002082 | ENSDART00000005010 | Dr.195.1.S1_at,Dr.195.1.S2_at,Dr.195.1.S1_at    | ck2a1                                                        | casein kinase 2 alpha 1 [Source:RefSeq_peptide;Acc:NP_571327]                                 | -553  | -548  | 1      | ggcgtg   |
| ENSDARG00000002667 | ENSDART00000003004 | Dr.23470.1.S1_s_at,Dr.8198.1.A1_at              | klm12.2                                                      | Kreisler (mouse) maf-related leucine zipper homolog 2.2 [Source:RefSeq_peptide;Acc:NP_571917] | -248  | -243  | 1      | ggcgtg   |
| ENSDARG00000002667 | ENSDART00000003004 | Dr.23470.1.S1_s_at,Dr.8198.1.A1_at              | klm12.2                                                      | Kreisler (mouse) maf-related leucine zipper homolog 2.2 [Source:RefSeq_peptide;Acc:NP_571917] | -215  | -210  | 1      | agcgtg   |
| ENSDARG00000002667 | ENSDART00000003004 | Dr.23470.1.S1_s_at,Dr.8198.1.A1_at              | klm12.2                                                      | Kreisler (mouse) maf-related leucine zipper homolog 2.2 [Source:RefSeq_peptide;Acc:NP_571917] | -248  | -243  | 1      | ggcgtg   |
| ENSDARG00000002667 | ENSDART00000003004 | Dr.23470.1.S1_s_at,Dr.8198.1.A1_at              | klm12.2                                                      | Kreisler (mouse) maf-related leucine zipper homolog 2.2 [Source:RefSeq_peptide;Acc:NP_571917] | -215  | -210  | 1      | agcgtg   |
| ENSDARG00000003216 | ENSDART00000011967 | Dr.1260.1.S1_at                                 | annexin A2a (anxa2a), mRNA [Source:RefSeq_dna;Acc:NM_181761] | -3672                                                                                         | -3667 | -1    | agcgtg |          |
| ENSDARG00000003323 | ENSDART00000017567 | Dr.12575.1.S1_at                                | dcp1a                                                        | decapping enzyme [Source:RefSeq_peptide;Acc:NP_878313]                                        | -2628 | -2623 | -1     | tcgctg   |
| ENSDARG00000003323 | ENSDART00000017567 | Dr.12575.1.S1_at                                | dcp1a                                                        | decapping enzyme [Source:RefSeq_peptide;Acc:NP_878313]                                        | -2299 | -2294 | -1     | ggcgtg   |
| ENSDARG00000003323 | ENSDART00000017567 | Dr.12575.1.S1_at                                | dcp1a                                                        | decapping enzyme [Source:RefSeq_peptide;Acc:NP_878313]                                        | -170  | -165  | 1      | agcgtg   |
| ENSDARG00000004060 | ENSDART00000026017 | Dr.3180.1.A1_at                                 | zgc:76913                                                    | Unknown (protein for MGC:76913) [Source:RefSeq_peptide;Acc:NP_997844]                         | -1103 | -1098 | -1     | tcgctg   |
| ENSDARG00000004296 | ENSDART00000027026 | Dr.2426.1.S1_at                                 | zgc:66321                                                    | similar to alpha-1-microglobulin/bikunin precursor [Source:RefSeq_peptide;Acc:NP_957412]      | -3749 | -3744 | 1      | tcgctg   |
| ENSDARG00000004296 | ENSDART00000027026 | Dr.2426.1.S1_at                                 | zgc:66321                                                    | similar to alpha-1-microglobulin/bikunin precursor [Source:RefSeq_peptide;Acc:NP_957412]      | -3743 | -3738 | 1      | tcgctg   |
| ENSDARG00000004296 | ENSDART00000027026 | Dr.2426.1.S1_at                                 | zgc:66321                                                    | similar to alpha-1-microglobulin/bikunin precursor [Source:RefSeq_peptide;Acc:NP_957412]      | -3737 | -3732 | 1      | tcgctg   |
| ENSDARG00000004296 | ENSDART00000027026 | Dr.2426.1.S1_at                                 | zgc:66321                                                    | similar to alpha-1-microglobulin/bikunin precursor [Source:RefSeq_peptide;Acc:NP_957412]      | -3725 | -3720 | 1      | tcgctg   |
| ENSDARG00000004296 | ENSDART00000027026 | Dr.2426.1.S1_at                                 | zgc:66321                                                    | similar to alpha-1-microglobulin/bikunin precursor [Source:RefSeq_peptide;Acc:NP_957412]      | 30    | 35    | 1      | tcgctg   |
| ENSDARG00000005186 | ENSDART00000002285 | Dr.26469.1.S1_at                                | NP_956418.1                                                  | sp4 transcription factor [Source:RefSeq_peptide;Acc:NP_956418]                                | -3691 | -3686 | 1      | tcgctg   |
| ENSDARG00000005186 | ENSDART00000002285 | Dr.26469.1.S1_at                                | NP_956418.1                                                  | sp4 transcription factor [Source:RefSeq_peptide;Acc:NP_956418]                                | -3596 | -3591 | 1      | agcgtg   |
| ENSDARG00000005186 | ENSDART00000002285 | Dr.26469.1.S1_at                                | NP_956418.1                                                  | sp4 transcription factor [Source:RefSeq_peptide;Acc:NP_956418]                                | -855  | -850  | -1     | tcgctg   |
| ENSDARG00000005186 | ENSDART00000002285 | Dr.26469.1.S1_at                                | NP_956418.1                                                  | sp4 transcription factor [Source:RefSeq_peptide;Acc:NP_956418]                                | -844  | -839  | 1      | ggcgtg   |
| ENSDARG00000005186 | ENSDART00000002285 | Dr.26469.1.S1_at                                | NP_956418.1                                                  | sp4 transcription factor [Source:RefSeq_peptide;Acc:NP_956418]                                | -820  | -815  | -1     | agcgtg   |
| ENSDARG00000005186 | ENSDART00000002285 | Dr.26469.1.S1_at                                | NP_956418.1                                                  | sp4 transcription factor [Source:RefSeq_peptide;Acc:NP_956418]                                | -791  | -786  | 1      | ggcgtg   |
| ENSDARG00000005186 | ENSDART00000002285 | Dr.26469.1.S1_at                                | NP_956418.1                                                  | sp4 transcription factor [Source:RefSeq_peptide;Acc:NP_956418]                                | -532  | -527  | -1     | ggcgtg   |
| ENSDARG00000005186 | ENSDART00000002285 | Dr.26469.1.S1_at                                | NP_956418.1                                                  | sp4 transcription factor [Source:RefSeq_peptide;Acc:NP_956418]                                | -383  | -378  | -1     | agcgtg   |
| ENSDARG00000006074 | ENSDART00000002186 | Dr.15856.1.A1_at,Dr.13404.1.A1_at               | NP_956234.1                                                  | uridine monophosphate kinase [Source:RefSeq_peptide;Acc:NP_956234]                            | -3203 | -3198 | 1      | tcgctg   |
| ENSDARG00000006526 | ENSDART00000017312 | Dr.24233.1.S1_at                                | fn1b                                                         | fibronectin 1b (fn1b), mRNA [Source:RefSeq_dna;Acc:NM_001013261]                              | -2209 | -2204 | 1      | ggcgtg   |
| ENSDARG00000006526 | ENSDART00000017312 | Dr.24233.1.S1_at                                | fn1b                                                         | fibronectin 1b (fn1b), mRNA [Source:RefSeq_dna;Acc:NM_001013261]                              | -2163 | -2158 | -1     | ggcgtg   |
| ENSDARG00000006526 | ENSDART00000017312 | Dr.24233.1.S1_at                                | fn1b                                                         | fibronectin 1b (fn1b), mRNA [Source:RefSeq_dna;Acc:NM_001013261]                              | -1504 | -1499 | -1     | tcgctg   |
| ENSDARG00000006526 | ENSDART00000017312 | Dr.24233.1.S1_at                                | fn1b                                                         | fibronectin 1b (fn1b), mRNA [Source:RefSeq_dna;Acc:NM_001013261]                              | -4430 | -4425 | 1      | ggcgtg   |
| ENSDARG00000006526 | ENSDART00000017312 | Dr.24233.1.S1_at                                | fn1b                                                         | fibronectin 1b (fn1b), mRNA [Source:RefSeq_dna;Acc:NM_001013261]                              | -4387 | -4382 | -1     | agcgtg   |
| ENSDARG00000006526 | ENSDART00000023692 | Dr.24233.1.S1_at                                | fn1b                                                         | fibronectin 1b (fn1b), mRNA [Source:RefSeq_dna;Acc:NM_001013261]                              | -2223 | -2218 | 1      | agcgtg   |
| ENSDARG00000006526 | ENSDART00000023692 | Dr.24233.1.S1_at                                | fn1b                                                         | fibronectin 1b (fn1b), mRNA [Source:RefSeq_dna;Acc:NM_001013261]                              | -1263 | -1258 | 1      | tcgctg   |
| ENSDARG00000007219 | ENSDART00000005791 | Dr.25774.1.S1_at                                | fn1b                                                         | fibronectin 1b (fn1b), mRNA [Source:RefSeq_dna;Acc:NM_001013261]                              | -2349 | -2344 | -1     | agcgtg   |
| ENSDARG00000007219 | ENSDART00000005791 | Dr.25774.1.S1_at                                | fn1b                                                         | fibronectin 1b (fn1b), mRNA [Source:RefSeq_dna;Acc:NM_001013261]                              | -1147 | -1142 | -1     | agcgtg   |
| ENSDARG00000007219 | ENSDART00000005791 | Dr.25774.1.S1_at                                | fn1b                                                         | fibronectin 1b (fn1b), mRNA [Source:RefSeq_dna;Acc:NM_001013261]                              | -817  | -812  | -1     | agcgtg   |
| ENSDARG00000007481 | ENSDART00000058261 | Dr.5002.1.A1_at                                 | rap1b                                                        | RAS related protein 1b [Source:RefSeq_peptide;Acc:NP_955827]                                  | -12   | -7    | 1      | cgcgtg   |
| ENSDARG00000008867 | ENSDART00000042250 | Dr.3628.1.S1_at                                 | rap1b                                                        | RAS related protein 1b [Source:RefSeq_peptide;Acc:NP_955827]                                  | -3595 | -3590 | -1     | cgcgtg   |
| ENSDARG00000008867 | ENSDART00000042250 | Dr.3628.1.S1_at                                 | rap1b                                                        | RAS related protein 1b [Source:RefSeq_peptide;Acc:NP_955827]                                  | -1533 | -1528 | -1     | tcgctg   |
| ENSDARG00000008867 | ENSDART00000042250 | Dr.3628.1.S1_at                                 | rap1b                                                        | RAS related protein 1b [Source:RefSeq_peptide;Acc:NP_955827]                                  | -234  | -229  | -1     | agcgtg   |
| ENSDARG00000008895 | ENSDART00000055048 | Dr.1619.1.A1_at,Dr.1619.1.A1_at,Dr.1619.1.A1_at | fgb                                                          | fibrinogen, B beta polypeptide [Source:RefSeq_peptide;Acc:NP_997939]                          | -1617 | -1612 | 1      | cgcgtg   |
| ENSDARG00000008969 | ENSDART00000011701 | Dr.5462.1.S1_at,Dr.5462.1.S1_at                 | fgb                                                          | fibrinogen, B beta polypeptide [Source:RefSeq_peptide;Acc:NP_997939]                          | -3590 | -3585 | 1      | agcgtg   |
| ENSDARG00000008969 | ENSDART00000011701 | Dr.5462.1.S1_at,Dr.5462.1.S1_at                 | fgb                                                          | fibrinogen, B beta polypeptide [Source:RefSeq_peptide;Acc:NP_997939]                          | -3263 | -3258 | 1      | ggcgtg   |
| ENSDARG00000008969 | ENSDART00000011701 | Dr.5462.1.S1_at,Dr.5462.1.S1_at                 | fgb                                                          | fibrinogen, B beta polypeptide [Source:RefSeq_peptide;Acc:NP_997939]                          | -2312 | -2307 | -1     | tcgctg   |
| ENSDARG00000008969 | ENSDART00000011701 | Dr.5462.1.S1_at,Dr.5462.1.S1_at                 | fgb                                                          | fibrinogen, B beta polypeptide [Source:RefSeq_peptide;Acc:NP_997939]                          | -2219 | -2214 | -1     | cgcgtg   |
| ENSDARG00000008969 | ENSDART00000041987 | Dr.5462.1.S1_at,Dr.5462.1.S1_at                 | fgb                                                          | fibrinogen, B beta polypeptide [Source:RefSeq_peptide;Acc:NP_997939]                          | -311  | -306  | -1     | tcgctg   |
| ENSDARG00000008969 | ENSDART00000041987 | Dr.5462.1.S1_at,Dr.5462.1.S1_at                 | fgb                                                          | fibrinogen, B beta polypeptide [Source:RefSeq_peptide;Acc:NP_997939]                          | -178  | -173  | 1      | tcgctg   |
| ENSDARG00000009483 | ENSDART00000009889 | Dr.25378.1.A1_at,Dr.24858.1.S1_at               | zgc:110540                                                   | deoxycytidine kinase [Source:RefSeq_peptide;Acc:NP_001014374]                                 | -1352 | -1347 | -1     | cgcgtg   |
| ENSDARG00000009483 | ENSDART00000009889 | Dr.25378.1.A1_at,Dr.24858.1.S1_at               | zgc:110540                                                   | deoxycytidine kinase [Source:RefSeq_peptide;Acc:NP_001014374]                                 | -1350 | -1345 | 1      | cgcgtg   |
| ENSDARG00000009483 | ENSDART00000009889 | Dr.25378.1.A1_at,Dr.24858.1.S1_at               | zgc:110540                                                   | deoxycytidine kinase [Source:RefSeq_peptide;Acc:NP_001014374]                                 | -1280 | -1275 | 1      | agcgtg   |
| ENSDARG00000009483 | ENSDART00000009889 | Dr.25378.1.A1_at,Dr.24858.1.S1_at               | zgc:110540                                                   | deoxycytidine kinase [Source:RefSeq_peptide;Acc:NP_001014374]                                 | -1352 | -1347 | -1     | cgcgtg   |
| ENSDARG00000009483 | ENSDART00000009889 | Dr.25378.1.A1_at,Dr.24858.1.S1_at               | zgc:110540                                                   | deoxycytidine kinase [Source:RefSeq_peptide;Acc:NP_001014374]                                 | -1350 | -1345 | 1      | cgcgtg   |
| ENSDARG00000009483 | ENSDART00000009889 | Dr.25378.1.A1_at,Dr.24858.1.S1_at               | zgc:110540                                                   | deoxycytidine kinase [Source:RefSeq_peptide;Acc:NP_001014374]                                 | -1280 | -1275 | 1      | agcgtg   |
| ENSDARG00000010312 | ENSDART00000010537 | Dr.3613.1.S1_at                                 | ndrg1l                                                       | N-myc downstream regulated gene 1, like [Source:RefSeq_peptide;Acc:NP_956986]                 | -3990 | -3985 | -1     | tcgctg   |
| ENSDARG00000010312 | ENSDART00000010537 | Dr.3613.1.S1_at                                 | ndrg1l                                                       | N-myc downstream regulated gene 1, like [Source:RefSeq_peptide;Acc:NP_956986]                 | -1870 | -1865 | -1     | ggcgtg   |
| ENSDARG00000010312 | ENSDART00000010537 | Dr.3613.1.S1_at                                 | ndrg1l                                                       | N-myc downstream regulated gene 1, like [Source:RefSeq_peptide;Acc:NP_956986]                 | -1737 | -1732 | 1      | ggcgtg   |
| ENSDARG00000010312 | ENSDART00000010537 | Dr.3613.1.S1_at                                 | ndrg1l                                                       | N-myc downstream regulated gene 1, like [Source:RefSeq_peptide;Acc:NP_956986]                 | -125  | -120  | 1      | tcgctg   |
| ENSDARG00000010420 | ENSDART00000049420 | Dr.8090.1.A1_at                                 | ndrg1l                                                       | N-myc downstream regulated gene 1, like [Source:RefSeq_peptide;Acc:NP_956986]                 | -3038 | -3033 | 1      | agcgtg   |
| ENSDARG00000010420 | ENSDART00000049420 | Dr.8090.1.A1_at                                 | ndrg1l                                                       | N-myc downstream regulated gene 1, like [Source:RefSeq_peptide;Acc:NP_956986]                 | -2866 | -2855 | -1     | agcgtg   |
| ENSDARG00000010481 | ENSDART00000013575 | Dr.25498.1.S1_at                                | NP_956002.1                                                  | basic leucine zipper and W2 domains 1 [Source:RefSeq_peptide;Acc:NP_956002]                   | -2137 | -2132 | -1     | ggcgtg   |
| ENSDARG00000010481 | ENSDART00000013575 | Dr.25498.1.S1_at                                | NP_956002.1                                                  | basic leucine zipper and W2 domains 1 [Source:RefSeq_peptide;Acc:NP_956002]                   | -1647 | -1642 | 1      | tcgctg   |
| ENSDARG00000011312 | ENSDART00000008698 | Dr.24253.1.S1_at                                | stk3                                                         | serine/threonine kinase 3 (STE20 homolog, yeast) [Source:RefSeq_peptide;Acc:NP_955966]        | -3610 | -3605 | -1     | agcgtg   |
| ENSDARG00000011312 | ENSDART00000008698 | Dr.24253.1.S1_at                                | stk3                                                         | serine/threonine kinase 3 (STE20 homolog, yeast) [Source:RefSeq_peptide;Acc:NP_955966]        | -3392 | -3387 | -1     | agcgtg   |
| ENSDARG00000011312 | ENSDART00000008698 | Dr.24253.1.S1_at                                | stk3                                                         | serine/threonine kinase 3 (STE20 homolog, yeast) [Source:RefSeq_peptide;Acc:NP_955966]        | -3025 | -3020 | -1     | agcgtg   |
| ENSDARG00000011312 | ENSDART00000008698 | Dr.24253.1.S1_at                                | stk3                                                         | serine/threonine kinase 3 (STE20 homolog, yeast) [Source:RefSeq_peptide;Acc:NP_955966]        | -2651 | -2646 | -1     | agcgtg   |
| ENSDARG00000011312 | ENSDART00000008698 | Dr.24253.1.S1_at                                | stk3                                                         | serine/threonine kinase 3 (STE20 homolog, yeast) [Source:RefSeq_peptide;Acc:NP_955966]        | -1477 | -1472 | -1     | agcgtg   |
| ENSDARG00000011683 | ENSDART00000013454 | Dr.8045.1.S1_at                                 | NP_955812.2                                                  | HHPG protein [Source:RefSeq_peptide;Acc:NP_955812]                                            | -1022 | -97   | -1     | ggcgtg   |
| ENSDARG00000012395 | ENSDART00000005436 | Dr.10314.1.S1_a_at                              | mmp13                                                        | matrix metalloproteinase 13 [Source:RefSeq_peptide;Acc:NP_958911]                             | -2663 | -2658 | -1     | tcgctg   |
| ENSDARG00000012395 | ENSDART00000005436 | Dr.10314.1.S1_a_at                              | mmp13                                                        | matrix metalloproteinase 13 [Source:RefSeq_peptide;Acc:NP_958911]                             | -2528 | -2523 | 1      | ggcgtg   |
| ENSDARG00000012395 | ENSDART00000005436 | Dr.10314.1.S1_a_at                              | mmp13                                                        | matrix metalloproteinase 13 [Source:RefSeq_peptide;Acc:NP_958911]                             | -2276 | -2271 | -1     | cgcgtg   |
| ENSDARG00000012395 | ENSDART00000005436 | Dr.10314.1.S1_a_at                              | mmp13                                                        | matrix metalloproteinase 13 [Source:RefSeq_peptide;Acc:NP_958911]                             | -2020 | -2015 | 1      | ggcgtg   |
|                    |                    |                                                 |                                                              |                                                                                               |       |       |        |          |

Supplementary Table 2 (cont.). Location of putative AHRES

| Gene ID            | Transcript ID      | Affy IDs                                                                                           | Symbol         | Description                                                                                                                                 | Start | End   | Strand | Sequence |
|--------------------|--------------------|----------------------------------------------------------------------------------------------------|----------------|---------------------------------------------------------------------------------------------------------------------------------------------|-------|-------|--------|----------|
| ENSDARG00000013481 | ENSDART00000007454 | Dr.17662.1.S1_at                                                                                   | bty            | bloodthirsty (bty), mRNA [Source:RefSeq_dna;Acc:NM_001020475]                                                                               | -1542 | -1537 | -1     | tcgctg   |
| ENSDARG00000013613 | ENSDART00000018408 | Dr.16504.1.A1_at                                                                                   | zgc:112421     | hypothetical protein LOC554118 [Source:RefSeq_peptide;Acc:NP_001019585]                                                                     | -1875 | -1870 | -1     | ccgctg   |
| ENSDARG00000013613 | ENSDART00000018408 | Dr.16504.1.A1_at                                                                                   | zgc:112421     | hypothetical protein LOC554118 [Source:RefSeq_peptide;Acc:NP_001019585]                                                                     | -1475 | -1470 | -1     | tcgctg   |
| ENSDARG00000013613 | ENSDART00000018408 | Dr.16504.1.A1_at                                                                                   | zgc:112421     | hypothetical protein LOC554118 [Source:RefSeq_peptide;Acc:NP_001019585]                                                                     | -1422 | -1417 | -1     | agcgtg   |
| ENSDARG00000013646 | ENSDART00000019664 | Dr.1605.1.S1_at                                                                                    | serpina1       | serine (or cysteine) proteinase inhibitor, clade A (alpha-1 antiproteinase, antitrypsin), member 1 [Source:RefSeq_peptide;Acc:NP_001013277] | -4808 | -4803 | -1     | agcgtg   |
| ENSDARG00000014209 | ENSDART00000023208 | Dr.15930.1.A1_at                                                                                   | NP_001017836.1 | hypothetical protein LOC550534 [Source:RefSeq_peptide;Acc:NP_001017836]                                                                     | -3248 | -3243 | -1     | agcgtg   |
| ENSDARG00000014209 | ENSDART00000023208 | Dr.15930.1.A1_at                                                                                   | NP_001017836.1 | hypothetical protein LOC550534 [Source:RefSeq_peptide;Acc:NP_001017836]                                                                     | -2763 | -2758 | -1     | agcgtg   |
| ENSDARG00000014209 | ENSDART00000023208 | Dr.15930.1.A1_at                                                                                   | NP_001017836.1 | hypothetical protein LOC550534 [Source:RefSeq_peptide;Acc:NP_001017836]                                                                     | -4258 | -4253 | -1     | ggcgtg   |
| ENSDARG00000014429 | ENSDART00000017280 | Dr.4907.1.S1_at                                                                                    | fgg            | fibrinogen gamma polypeptide [Source:RefSeq_peptide;Acc:NP_998219]                                                                          | -4836 | -4831 | 1      | ccgctg   |
| ENSDARG00000014629 | ENSDART00000020883 | Dr.921.1.A1_at,DrAffx.2.64.S1_at,Dr.921.1.A1_at,DrAffx.2.64.S1_at,Dr.921.1.A1_at,DrAffx.2.64.S1_at |                |                                                                                                                                             | -4912 | -4907 | -1     | tcgctg   |
| ENSDARG00000014629 | ENSDART00000020883 | Dr.921.1.A1_at,DrAffx.2.64.S1_at,Dr.921.1.A1_at,DrAffx.2.64.S1_at,Dr.921.1.A1_at,DrAffx.2.64.S1_at |                |                                                                                                                                             | -4071 | -4066 | -1     | agcgtg   |
| ENSDARG00000014629 | ENSDART00000049779 | Dr.921.1.A1_at,DrAffx.2.64.S1_at,Dr.921.1.A1_at,DrAffx.2.64.S1_at,Dr.921.1.A1_at,DrAffx.2.64.S1_at |                |                                                                                                                                             | -4912 | -4907 | -1     | tcgctg   |
| ENSDARG00000014629 | ENSDART00000049779 | Dr.921.1.A1_at,DrAffx.2.64.S1_at,Dr.921.1.A1_at,DrAffx.2.64.S1_at,Dr.921.1.A1_at,DrAffx.2.64.S1_at |                |                                                                                                                                             | -4071 | -4066 | -1     | agcgtg   |
| ENSDARG00000014629 | ENSDART00000066174 | Dr.921.1.A1_at,DrAffx.2.64.S1_at,Dr.921.1.A1_at,DrAffx.2.64.S1_at,Dr.921.1.A1_at,DrAffx.2.64.S1_at |                |                                                                                                                                             | -4912 | -4907 | -1     | tcgctg   |
| ENSDARG00000014629 | ENSDART00000066174 | Dr.921.1.A1_at,DrAffx.2.64.S1_at,Dr.921.1.A1_at,DrAffx.2.64.S1_at,Dr.921.1.A1_at,DrAffx.2.64.S1_at |                |                                                                                                                                             | -4071 | -4066 | -1     | agcgtg   |
| ENSDARG00000014947 | ENSDART00000026576 | Dr.8587.1.A1_at,Dr.8587.1.A2_at                                                                    | igfbp1         | insulin-like growth factor binding protein 1 [Source:RefSeq_peptide;Acc:NP_775390]                                                          | -3978 | -3973 | -1     | tcgctg   |
| ENSDARG00000014947 | ENSDART00000026576 | Dr.8587.1.A1_at,Dr.8587.1.A2_at                                                                    | igfbp1         | insulin-like growth factor binding protein 1 [Source:RefSeq_peptide;Acc:NP_775390]                                                          | -3265 | -3260 | -1     | tcgctg   |
| ENSDARG00000014947 | ENSDART00000026576 | Dr.8587.1.A1_at,Dr.8587.1.A2_at                                                                    | igfbp1         | insulin-like growth factor binding protein 1 [Source:RefSeq_peptide;Acc:NP_775390]                                                          | -2732 | -2727 | -1     | tcgctg   |
| ENSDARG00000014947 | ENSDART00000026576 | Dr.8587.1.A1_at,Dr.8587.1.A2_at                                                                    | igfbp1         | insulin-like growth factor binding protein 1 [Source:RefSeq_peptide;Acc:NP_775390]                                                          | -1510 | -1505 | 1      | ccgctg   |
| ENSDARG00000014947 | ENSDART00000026576 | Dr.8587.1.A1_at,Dr.8587.1.A2_at                                                                    | igfbp1         | insulin-like growth factor binding protein 1 [Source:RefSeq_peptide;Acc:NP_775390]                                                          | -1468 | -1463 | -1     | ccgctg   |
| ENSDARG00000014947 | ENSDART00000026576 | Dr.8587.1.A1_at,Dr.8587.1.A2_at                                                                    | igfbp1         | insulin-like growth factor binding protein 1 [Source:RefSeq_peptide;Acc:NP_775390]                                                          | -1419 | -1414 | -1     | ccgctg   |
| ENSDARG00000014947 | ENSDART00000026576 | Dr.8587.1.A1_at,Dr.8587.1.A2_at                                                                    | igfbp1         | insulin-like growth factor binding protein 1 [Source:RefSeq_peptide;Acc:NP_775390]                                                          | -1375 | -1370 | 1      | tcgctg   |
| ENSDARG00000014947 | ENSDART00000026576 | Dr.8587.1.A1_at,Dr.8587.1.A2_at                                                                    | igfbp1         | insulin-like growth factor binding protein 1 [Source:RefSeq_peptide;Acc:NP_775390]                                                          | -1229 | -1224 | 1      | ccgctg   |
| ENSDARG00000014947 | ENSDART00000026576 | Dr.8587.1.A1_at,Dr.8587.1.A2_at                                                                    | igfbp1         | insulin-like growth factor binding protein 1 [Source:RefSeq_peptide;Acc:NP_775390]                                                          | -1076 | -1071 | -1     | ccgctg   |
| ENSDARG00000014947 | ENSDART00000026576 | Dr.8587.1.A1_at,Dr.8587.1.A2_at                                                                    | igfbp1         | insulin-like growth factor binding protein 1 [Source:RefSeq_peptide;Acc:NP_775390]                                                          | -229  | -224  | -1     | agcgtg   |
| ENSDARG00000014947 | ENSDART00000026576 | Dr.8587.1.A1_at,Dr.8587.1.A2_at                                                                    | igfbp1         | insulin-like growth factor binding protein 1 [Source:RefSeq_peptide;Acc:NP_775390]                                                          | -220  | -215  | -1     | agcgtg   |
| ENSDARG00000014947 | ENSDART00000026576 | Dr.8587.1.A1_at,Dr.8587.1.A2_at                                                                    | igfbp1         | insulin-like growth factor binding protein 1 [Source:RefSeq_peptide;Acc:NP_775390]                                                          | -72   | -67   | -1     | agcgtg   |
| ENSDARG00000015866 | ENSDART00000019110 | Dr.728.4.S1_at,Dr.728.4.S1_at,Dr.728.4.S1_at                                                       |                |                                                                                                                                             | -3239 | -3234 | -1     | tcgctg   |
| ENSDARG00000015866 | ENSDART00000019110 | Dr.728.4.S1_at,Dr.728.4.S1_at,Dr.728.4.S1_at                                                       |                |                                                                                                                                             | -401  | -396  | 1      | ccgctg   |
| ENSDARG00000015866 | ENSDART00000058963 | Dr.728.4.S1_at,Dr.728.4.S1_at,Dr.728.4.S1_at                                                       |                |                                                                                                                                             | -3537 | -3532 | -1     | tcgctg   |
| ENSDARG00000015866 | ENSDART00000058963 | Dr.728.4.S1_at,Dr.728.4.S1_at,Dr.728.4.S1_at                                                       |                |                                                                                                                                             | -699  | -694  | 1      | ccgctg   |
| ENSDARG00000015866 | ENSDART00000058964 | Dr.728.4.S1_at,Dr.728.4.S1_at,Dr.728.4.S1_at                                                       |                |                                                                                                                                             | -3239 | -3234 | -1     | tcgctg   |
| ENSDARG00000015866 | ENSDART00000058964 | Dr.728.4.S1_at,Dr.728.4.S1_at,Dr.728.4.S1_at                                                       |                |                                                                                                                                             | -401  | -396  | 1      | ccgctg   |
| ENSDARG00000016059 | ENSDART00000021065 | Dr.13182.1.A1_at                                                                                   | rab5b          | RAB5B, member RAS oncogene family [Source:RefSeq_peptide;Acc:NP_998050]                                                                     | -3042 | -3037 | -1     | tcgctg   |
| ENSDARG00000016059 | ENSDART00000021065 | Dr.13182.1.A1_at                                                                                   | rab5b          | RAB5B, member RAS oncogene family [Source:RefSeq_peptide;Acc:NP_998050]                                                                     | -2041 | -2036 | -1     | agcgtg   |
| ENSDARG00000016059 | ENSDART00000021065 | Dr.13182.1.A1_at                                                                                   | rab5b          | RAB5B, member RAS oncogene family [Source:RefSeq_peptide;Acc:NP_998050]                                                                     | -672  | -667  | -1     | agcgtg   |
| ENSDARG00000016059 | ENSDART00000021065 | Dr.13182.1.A1_at                                                                                   | rab5b          | RAB5B, member RAS oncogene family [Source:RefSeq_peptide;Acc:NP_998050]                                                                     | -4468 | -4463 | 1      | agcgtg   |
| ENSDARG00000016448 | ENSDART00000014979 | Dr.2978.1.S1_at                                                                                    | vg3            | Vitellogenin 3 (Fragment). [Source:Uniprot/SPTREMBL;Acc:Q9DFT9]                                                                             | -1530 | -1525 | -1     | tcgctg   |
| ENSDARG00000016771 | ENSDART00000003845 | Dr.1889.2.A1_a_at,Dr.1889.1.S1_at                                                                  | tfa            | transferrin-a [Source:RefSeq_peptide;Acc:NP_001015057]                                                                                      | -3533 | -3528 | -1     | tcgctg   |
| ENSDARG00000016771 | ENSDART00000003845 | Dr.1889.2.A1_a_at,Dr.1889.1.S1_at                                                                  | tfa            | transferrin-a [Source:RefSeq_peptide;Acc:NP_001015057]                                                                                      | -3351 | -3346 | -1     | agcgtg   |
| ENSDARG00000016771 | ENSDART00000003845 | Dr.1889.2.A1_a_at,Dr.1889.1.S1_at                                                                  | tfa            | transferrin-a [Source:RefSeq_peptide;Acc:NP_001015057]                                                                                      | -2761 | -2756 | -1     | ccgctg   |
| ENSDARG00000016771 | ENSDART00000003845 | Dr.1889.2.A1_a_at,Dr.1889.1.S1_at                                                                  | tfa            | transferrin-a [Source:RefSeq_peptide;Acc:NP_001015057]                                                                                      | -2755 | -2750 | -1     | tcgctg   |
| ENSDARG00000016771 | ENSDART00000003845 | Dr.1889.2.A1_a_at,Dr.1889.1.S1_at                                                                  | tfa            | transferrin-a [Source:RefSeq_peptide;Acc:NP_001015057]                                                                                      | -4965 | -4960 | -1     | tcgctg   |
| ENSDARG00000016771 | ENSDART00000003845 | Dr.1889.2.A1_a_at,Dr.1889.1.S1_at                                                                  | tfa            | transferrin-a [Source:RefSeq_peptide;Acc:NP_001015057]                                                                                      | -3533 | -3528 | -1     | tcgctg   |
| ENSDARG00000016771 | ENSDART00000003845 | Dr.1889.2.A1_a_at,Dr.1889.1.S1_at                                                                  | tfa            | transferrin-a [Source:RefSeq_peptide;Acc:NP_001015057]                                                                                      | -3351 | -3346 | -1     | agcgtg   |
| ENSDARG00000016771 | ENSDART00000003845 | Dr.1889.2.A1_a_at,Dr.1889.1.S1_at                                                                  | tfa            | transferrin-a [Source:RefSeq_peptide;Acc:NP_001015057]                                                                                      | -2761 | -2756 | -1     | ccgctg   |
| ENSDARG00000016771 | ENSDART00000003845 | Dr.1889.2.A1_a_at,Dr.1889.1.S1_at                                                                  | tfa            | transferrin-a [Source:RefSeq_peptide;Acc:NP_001015057]                                                                                      | -2755 | -2750 | -1     | tcgctg   |
| ENSDARG00000016771 | ENSDART00000003845 | Dr.1889.2.A1_a_at,Dr.1889.1.S1_at                                                                  | tfa            | transferrin-a [Source:RefSeq_peptide;Acc:NP_001015057]                                                                                      | -4965 | -4960 | -1     | tcgctg   |
| ENSDARG00000016825 | ENSDART00000050238 | Dr.25009.6.A1_a_at,Dr.25009.1.S1_a_at                                                              | NP_739573.1    | vitellogenin 1 [Source:RefSeq_peptide;Acc:NP_739573]                                                                                        | -3552 | -3547 | -1     | ccgctg   |
| ENSDARG00000016825 | ENSDART00000050238 | Dr.25009.6.A1_a_at,Dr.25009.1.S1_a_at                                                              | NP_739573.1    | vitellogenin 1 [Source:RefSeq_peptide;Acc:NP_739573]                                                                                        | -2451 | -2446 | -1     | tcgctg   |
| ENSDARG00000016825 | ENSDART00000050238 | Dr.25009.6.A1_a_at,Dr.25009.1.S1_a_at                                                              | NP_739573.1    | vitellogenin 1 [Source:RefSeq_peptide;Acc:NP_739573]                                                                                        | -1138 | -1133 | -1     | tcgctg   |
| ENSDARG00000016825 | ENSDART00000050238 | Dr.25009.6.A1_a_at,Dr.25009.1.S1_a_at                                                              | NP_739573.1    | vitellogenin 1 [Source:RefSeq_peptide;Acc:NP_739573]                                                                                        | -3552 | -3547 | 1      | ccgctg   |
| ENSDARG00000016825 | ENSDART00000050238 | Dr.25009.6.A1_a_at,Dr.25009.1.S1_a_at                                                              | NP_739573.1    | vitellogenin 1 [Source:RefSeq_peptide;Acc:NP_739573]                                                                                        | -2451 | -2446 | -1     | tcgctg   |
| ENSDARG00000016825 | ENSDART00000050238 | Dr.25009.6.A1_a_at,Dr.25009.1.S1_a_at                                                              | NP_739573.1    | vitellogenin 1 [Source:RefSeq_peptide;Acc:NP_739573]                                                                                        | -1138 | -1133 | -1     | tcgctg   |
| ENSDARG00000017619 | ENSDART00000026842 | Dr.25379.1.S1_at,Dr.3025.3.S1_at,Dr.25379.1.S1_at,Dr.3025.3.S1_at                                  |                |                                                                                                                                             | -3793 | -3788 | -1     | tcgctg   |
| ENSDARG00000017619 | ENSDART00000026842 | Dr.25379.1.S1_at,Dr.3025.3.S1_at,Dr.25379.1.S1_at,Dr.3025.3.S1_at                                  |                |                                                                                                                                             | -3785 | -3780 | 1      | tcgctg   |
| ENSDARG00000017619 | ENSDART00000026842 | Dr.25379.1.S1_at,Dr.3025.3.S1_at,Dr.25379.1.S1_at,Dr.3025.3.S1_at                                  |                |                                                                                                                                             | -3587 | -3582 | -1     | tcgctg   |
| ENSDARG00000017619 | ENSDART00000026842 | Dr.25379.1.S1_at,Dr.3025.3.S1_at,Dr.25379.1.S1_at,Dr.3025.3.S1_at                                  |                |                                                                                                                                             | -3364 | -3359 | -1     | ggcgtg   |
| ENSDARG00000017619 | ENSDART00000026842 | Dr.25379.1.S1_at,Dr.3025.3.S1_at,Dr.25379.1.S1_at,Dr.3025.3.S1_at                                  |                |                                                                                                                                             | -2980 | -2975 | 1      | agcgtg   |
| ENSDARG00000017619 | ENSDART00000026842 | Dr.25379.1.S1_at,Dr.3025.3.S1_at,Dr.25379.1.S1_at,Dr.3025.3.S1_at                                  |                |                                                                                                                                             | -2502 | -2497 | -1     | tcgctg   |
| ENSDARG00000017619 | ENSDART00000026842 | Dr.25379.1.S1_at,Dr.3025.3.S1_at,Dr.25379.1.S1_at,Dr.3025.3.S1_at                                  |                |                                                                                                                                             | -1174 | -1169 | -1     | tcgctg   |
| ENSDARG00000017619 | ENSDART00000038499 | Dr.25379.1.S1_at,Dr.3025.3.S1_at,Dr.25379.1.S1_at,Dr.3025.3.S1_at                                  |                |                                                                                                                                             | -2596 | -2591 | -1     | tcgctg   |
| ENSDARG00000017619 | ENSDART00000038499 | Dr.25379.1.S1_at,Dr.3025.3.S1_at,Dr.25379.1.S1_at,Dr.3025.3.S1_at                                  |                |                                                                                                                                             | -4243 | -4238 | -1     | tcgctg   |
| ENSDARG00000017619 | ENSDART00000038499 | Dr.25379.1.S1_at,Dr.3025.3.S1_at,Dr.25379.1.S1_at,Dr.3025.3.S1_at                                  |                |                                                                                                                                             | -4239 | -4234 | -1     | tcgctg   |
| ENSDARG00000017619 | ENSDART00000038499 | Dr.25379.1.S1_at,Dr.3025.3.S1_at,Dr.25379.1.S1_at,Dr.3025.3.S1_at                                  |                |                                                                                                                                             | -4053 | -4048 | -1     | tcgctg   |
| ENSDARG00000017619 | ENSDART00000026842 | Dr.25379.1.S1_at,Dr.3025.3.S1_at,Dr.25379.1.S1_at,Dr.3025.3.S1_at                                  |                |                                                                                                                                             | -3793 | -3788 | -1     | tcgctg   |
| ENSDARG00000017619 | ENSDART00000026842 | Dr.25379.1.S1_at,Dr.3025.3.S1_at,Dr.25379.1.S1_at,Dr.3025.3.S1_at                                  |                |                                                                                                                                             | -3785 | -3780 | 1      | tcgctg   |
| ENSDARG00000017619 | ENSDART00000026842 | Dr.25379.1.S1_at,Dr.3025.3.S1_at,Dr.25379.1.S1_at,Dr.3025.3.S1_at                                  |                |                                                                                                                                             | -3587 | -3582 | -1     | tcgctg   |
| ENSDARG00000017619 | ENSDART00000026842 | Dr.25379.1.S1_at,Dr.3025.3.S1_at,Dr.25379.1.S1_at,Dr.3025.3.S1_at                                  |                |                                                                                                                                             | -3364 | -3359 | 1      | ggcgtg   |
| ENSDARG00000017619 | ENSDART00000026842 | Dr.25379.1.S1_at,Dr.3025.3.S1_at,Dr.25379.1.S1_at,Dr.3025.3.S1_at                                  |                |                                                                                                                                             | -2980 | -2975 | -1     | agcgtg   |
| ENSDARG00000017619 | ENSDART00000026842 | Dr.25379.1.S1_at,Dr.3025.3.S1_at,Dr.25379.1.S1_at,Dr.3025.3.S1_at                                  |                |                                                                                                                                             | -2502 | -2497 | -1     | tcgctg   |
| ENSDARG00000017619 | ENSDART00000026842 | Dr.25379.1.S1_at,Dr.3025.3.S1_at,Dr.25379.1.S1_at,Dr.3025.3.S1_at                                  |                |                                                                                                                                             | -1174 | -1169 | -1     | tcgctg   |
| ENSDARG00000017619 | ENSDART00000038499 | Dr.25379.1.S1_at,Dr.3025.3.S1_at,Dr.25379.1.S1_at,Dr.3025.3.S1_at                                  |                |                                                                                                                                             | -2596 | -2591 | -1     | tcgctg   |
| ENSDARG00000017619 | ENSDART00000038499 | Dr.25379.1.S1_at,Dr.3025.3.S1_at,Dr.25379.1.S1_at,Dr.3025.3.S1_at                                  |                |                                                                                                                                             | -4243 | -4238 | -1     | tcgctg   |
| ENSDARG00000017619 | ENSDART00000038499 | Dr.25379.1.S1_at,Dr.3025.3.S1_at,Dr.25379.1.S1_at,Dr.3025.3.S1_at                                  |                |                                                                                                                                             | -4239 | -4234 | -1     | tcgctg   |
| ENSDARG00000017619 | ENSDART00000038499 | Dr.25379.1.S1_at,Dr.3025.3.S1_at,Dr.25379.1.S1_at,Dr.3025.3.S1_at                                  |                |                                                                                                                                             | -4053 | -4048 | -1     | tcgctg   |
| ENSDARG00000017624 | ENSDART00000012644 | Dr.4387.1.S1_at                                                                                    | kr4            | keratin 4 [Source:RefSeq_peptide;Acc:NP_571584]                                                                                             | -1874 | -1869 | -1     | tcgctg   |
| ENSDARG00000017624 | ENSDART00000012644 | Dr.4387.1.S1_at                                                                                    | kr4            | keratin 4 [Source:RefSeq_peptide;Acc:NP_571584]                                                                                             | -1435 | -1430 | -1     | tcgctg   |
| ENSDARG00000017624 | ENSDART00000012644 | Dr.4387.1.S1_at                                                                                    | kr4            | keratin 4 [Source:RefSeq_peptide;Acc:NP_571584]                                                                                             | -9    | -4    | -1     | tcgctg   |
| ENSDARG00000018404 | ENSDART00000020750 | Dr.1372.1.S1_at                                                                                    | kr18           | keratin 18 [Source:RefSeq_peptide;Acc:NP_848524]                                                                                            | -2408 | -2403 | -1     | ggcgtg   |
| ENSDARG00000018404 | ENSDART00000020750 | Dr.1372.1.S1_at                                                                                    | kr18           | keratin 18 [Source:RefSeq_peptide;Acc:NP_848524]                                                                                            | -4641 | -4636 | -      |          |

Supplementary Table 2 (cont.). Location of putative AHRES

| Gene ID            | Transcript ID      | Affy IDs                                                                                                                                                                                                                                                | Symbol       | Description                                                                                                                 | Start | End   | Strand | Sequence |        |
|--------------------|--------------------|---------------------------------------------------------------------------------------------------------------------------------------------------------------------------------------------------------------------------------------------------------|--------------|-----------------------------------------------------------------------------------------------------------------------------|-------|-------|--------|----------|--------|
| ENSDARG00000018529 | ENSDART00000020541 | Dr.4249.1.S1_at                                                                                                                                                                                                                                         | lipf         | lipase, gastric [Source:RefSeq_peptide;Acc:NP_998569]                                                                       |       | 0     | 5      | -1       | agcgtg |
| ENSDARG00000018921 | ENSDART00000023006 | Dr.9450.1.A1_at                                                                                                                                                                                                                                         | NP_956912.1  | hypothetical protein LOC393590 [Source:RefSeq_peptide;Acc:NP_956912]                                                        | -1589 | -1584 | 1      | tcgctg   |        |
| ENSDARG00000018921 | ENSDART00000023006 | Dr.9450.1.A1_at                                                                                                                                                                                                                                         | NP_956912.1  | hypothetical protein LOC393590 [Source:RefSeq_peptide;Acc:NP_956912]                                                        | -1563 | -1558 | 1      | tcgctg   |        |
| ENSDARG00000018921 | ENSDART00000023006 | Dr.9450.1.A1_at                                                                                                                                                                                                                                         | NP_956912.1  | hypothetical protein LOC393590 [Source:RefSeq_peptide;Acc:NP_956912]                                                        | -1559 | -1554 | 1      | tcgctg   |        |
| ENSDARG00000018921 | ENSDART00000023006 | Dr.9450.1.A1_at                                                                                                                                                                                                                                         | NP_956912.1  | hypothetical protein LOC393590 [Source:RefSeq_peptide;Acc:NP_956912]                                                        | 25    | 30    | -1     | cgctgt   |        |
|                    |                    | Dr.18039.1.S1_at,Dr.11348.1.S1_x_at,Dr.11348.1.S1_at,Dr.18039.1.S1_at,Dr.11348.1.S1_x_at,Dr.11348.1.S1_at,Dr.18039.1.S1_at,Dr.11348.1.S1_x_at,Dr.11348.1.S1_at,Dr.11348.1.S1_x_at,Dr.11348.1.S1_at,Dr.18039.1.S1_at,Dr.11348.1.S1_x_at,Dr.11348.1.S1_at |              |                                                                                                                             |       |       |        |          |        |
| ENSDARG00000019057 | ENSDART00000032224 | Dr.18039.1.S1_at,Dr.11348.1.S1_x_at,Dr.11348.1.S1_at,Dr.18039.1.S1_at,Dr.11348.1.S1_x_at,Dr.11348.1.S1_at,Dr.18039.1.S1_at,Dr.11348.1.S1_x_at,Dr.11348.1.S1_at                                                                                          |              |                                                                                                                             | -3377 | -3372 | -1     | tcgctg   |        |
| ENSDARG00000019057 | ENSDART00000048630 | Dr.18039.1.S1_at,Dr.11348.1.S1_x_at,Dr.11348.1.S1_at,Dr.18039.1.S1_at,Dr.11348.1.S1_x_at,Dr.11348.1.S1_at                                                                                                                                               |              |                                                                                                                             | -3377 | -3372 | -1     | tcgctg   |        |
| ENSDARG00000019057 | ENSDART00000050015 | Dr.11348.1.S1_at                                                                                                                                                                                                                                        |              |                                                                                                                             | -3377 | -3372 | -1     | tcgctg   |        |
| ENSDARG00000019302 | ENSDART0000007649  | Dr.25285.1.S1_at,Dr.11211.1.S1_at                                                                                                                                                                                                                       | zgc:73223    | hypothetical protein MGC73223 [Source:RefSeq_peptide;Acc:NP_957126]                                                         | -3810 | -3805 | 1      | agcgtg   |        |
| ENSDARG00000019302 | ENSDART0000007649  | Dr.25285.1.S1_at,Dr.11211.1.S1_at                                                                                                                                                                                                                       | zgc:73223    | hypothetical protein MGC73223 [Source:RefSeq_peptide;Acc:NP_957126]                                                         | -2001 | -1996 | 1      | tcgctg   |        |
| ENSDARG00000019302 | ENSDART0000007649  | Dr.25285.1.S1_at,Dr.11211.1.S1_at                                                                                                                                                                                                                       | zgc:73223    | hypothetical protein MGC73223 [Source:RefSeq_peptide;Acc:NP_957126]                                                         | -348  | -343  | -1     | tcgctg   |        |
| ENSDARG00000019302 | ENSDART0000007649  | Dr.25285.1.S1_at,Dr.11211.1.S1_at                                                                                                                                                                                                                       | zgc:73223    | hypothetical protein MGC73223 [Source:RefSeq_peptide;Acc:NP_957126]                                                         | -4447 | -4442 | 1      | tcgctg   |        |
| ENSDARG00000019469 | ENSDART00000011211 | Dr.24253.1.S1_at                                                                                                                                                                                                                                        | stk3         | serine/threonine kinase 3 (STE20 homolog, yeast) [Source:RefSeq_peptide;Acc:NP_955966]                                      | -3963 | -3958 | -1     | agcgtg   |        |
| ENSDARG00000019469 | ENSDART00000011211 | Dr.24253.1.S1_at                                                                                                                                                                                                                                        | stk3         | serine/threonine kinase 3 (STE20 homolog, yeast) [Source:RefSeq_peptide;Acc:NP_955966]                                      | -2701 | -2696 | -1     | ggcgtg   |        |
| ENSDARG00000019469 | ENSDART00000011211 | Dr.24253.1.S1_at                                                                                                                                                                                                                                        | stk3         | serine/threonine kinase 3 (STE20 homolog, yeast) [Source:RefSeq_peptide;Acc:NP_955966]                                      | -4704 | -4699 | -1     | agcgtg   |        |
| ENSDARG00000019469 | ENSDART00000011211 | Dr.24253.1.S1_at                                                                                                                                                                                                                                        | stk3         | serine/threonine kinase 3 (STE20 homolog, yeast) [Source:RefSeq_peptide;Acc:NP_955966]                                      | -1423 | -1418 | -1     | agcgtg   |        |
| ENSDARG00000019469 | ENSDART00000011211 | Dr.24253.1.S1_at                                                                                                                                                                                                                                        | stk3         | serine/threonine kinase 3 (STE20 homolog, yeast) [Source:RefSeq_peptide;Acc:NP_955966]                                      | -1407 | -1402 | 1      | ggcgtg   |        |
| ENSDARG00000019469 | ENSDART00000011211 | Dr.24253.1.S1_at                                                                                                                                                                                                                                        | stk3         | serine/threonine kinase 3 (STE20 homolog, yeast) [Source:RefSeq_peptide;Acc:NP_955966]                                      | -1232 | -1227 | -1     | tcgctg   |        |
| ENSDARG00000019469 | ENSDART00000011211 | Dr.24253.1.S1_at                                                                                                                                                                                                                                        | stk3         | serine/threonine kinase 3 (STE20 homolog, yeast) [Source:RefSeq_peptide;Acc:NP_955966]                                      | -1189 | -1184 | -1     | tcgctg   |        |
| ENSDARG00000019469 | ENSDART00000011211 | Dr.24253.1.S1_at                                                                                                                                                                                                                                        | stk3         | serine/threonine kinase 3 (STE20 homolog, yeast) [Source:RefSeq_peptide;Acc:NP_955966]                                      | -1139 | -1134 | -1     | tcgctg   |        |
| ENSDARG00000019469 | ENSDART00000011211 | Dr.24253.1.S1_at                                                                                                                                                                                                                                        | stk3         | serine/threonine kinase 3 (STE20 homolog, yeast) [Source:RefSeq_peptide;Acc:NP_955966]                                      | -1084 | -1079 | -1     | cgctgt   |        |
| ENSDARG00000019469 | ENSDART00000011211 | Dr.24253.1.S1_at                                                                                                                                                                                                                                        | stk3         | serine/threonine kinase 3 (STE20 homolog, yeast) [Source:RefSeq_peptide;Acc:NP_955966]                                      | -1056 | -1051 | -1     | cgctgt   |        |
| ENSDARG00000019469 | ENSDART00000011211 | Dr.24253.1.S1_at                                                                                                                                                                                                                                        | stk3         | serine/threonine kinase 3 (STE20 homolog, yeast) [Source:RefSeq_peptide;Acc:NP_955966]                                      | -1016 | -1011 | -1     | cgctgt   |        |
| ENSDARG00000019469 | ENSDART00000011211 | Dr.24253.1.S1_at                                                                                                                                                                                                                                        | stk3         | serine/threonine kinase 3 (STE20 homolog, yeast) [Source:RefSeq_peptide;Acc:NP_955966]                                      | -623  | -618  | 1      | cgctgt   |        |
| ENSDARG00000019469 | ENSDART00000011211 | Dr.24253.1.S1_at                                                                                                                                                                                                                                        | stk3         | serine/threonine kinase 3 (STE20 homolog, yeast) [Source:RefSeq_peptide;Acc:NP_955966]                                      | -159  | -154  | -1     | tcgctg   |        |
| ENSDARG00000019469 | ENSDART00000011211 | Dr.24253.1.S1_at                                                                                                                                                                                                                                        | stk3         | serine/threonine kinase 3 (STE20 homolog, yeast) [Source:RefSeq_peptide;Acc:NP_955966]                                      | -4337 | -4332 | -1     | agcgtg   |        |
| ENSDARG00000019469 | ENSDART00000011211 | Dr.24253.1.S1_at                                                                                                                                                                                                                                        | stk3         | serine/threonine kinase 3 (STE20 homolog, yeast) [Source:RefSeq_peptide;Acc:NP_955966]                                      | -4922 | -4917 | -1     | agcgtg   |        |
| ENSDARG00000019862 | ENSDART00000009054 | Dr.913.1.S1_at                                                                                                                                                                                                                                          | zgc:63909    | tropomyosin 4 isoform 2 [Source:RefSeq_peptide;Acc:NP_998323]                                                               | -3027 | -3022 | 1      | tcgctg   |        |
| ENSDARG00000019862 | ENSDART00000009054 | Dr.913.1.S1_at                                                                                                                                                                                                                                          | zgc:63909    | tropomyosin 4 isoform 2 [Source:RefSeq_peptide;Acc:NP_998323]                                                               | -2322 | -2317 | 1      | agcgtg   |        |
| ENSDARG00000019862 | ENSDART00000009054 | Dr.913.1.S1_at                                                                                                                                                                                                                                          | zgc:63909    | tropomyosin 4 isoform 2 [Source:RefSeq_peptide;Acc:NP_998323]                                                               | -1865 | -1860 | 1      | agcgtg   |        |
| ENSDARG00000020007 | ENSDART00000042990 | Dr.1377.1.A1_at,Dr.23532.1.A1_at,Dr.5521.1.S1_at                                                                                                                                                                                                        | col1a2       | collagen, type I, alpha 2 [Source:RefSeq_peptide;Acc:NP_892013]                                                             | -3691 | -3686 | -1     | cgctgt   |        |
| ENSDARG00000020007 | ENSDART00000042990 | Dr.1377.1.A1_at,Dr.23532.1.A1_at,Dr.5521.1.S1_at                                                                                                                                                                                                        | col1a2       | collagen, type I, alpha 2 [Source:RefSeq_peptide;Acc:NP_892013]                                                             | -2964 | -2959 | 1      | cgctgt   |        |
| ENSDARG00000020007 | ENSDART00000042990 | Dr.1377.1.A1_at,Dr.23532.1.A1_at,Dr.5521.1.S1_at                                                                                                                                                                                                        | col1a2       | collagen, type I, alpha 2 [Source:RefSeq_peptide;Acc:NP_892013]                                                             | -2808 | -2803 | 1      | tcgctg   |        |
| ENSDARG00000020007 | ENSDART00000042990 | Dr.1377.1.A1_at,Dr.23532.1.A1_at,Dr.5521.1.S1_at                                                                                                                                                                                                        | col1a2       | collagen, type I, alpha 2 [Source:RefSeq_peptide;Acc:NP_892013]                                                             | -909  | -904  | -1     | tcgctg   |        |
| ENSDARG00000020007 | ENSDART00000042990 | Dr.1377.1.A1_at,Dr.23532.1.A1_at,Dr.5521.1.S1_at                                                                                                                                                                                                        | col1a2       | collagen, type I, alpha 2 [Source:RefSeq_peptide;Acc:NP_892013]                                                             | -234  | -229  | -1     | cgctgt   |        |
| ENSDARG00000020190 | ENSDART00000003437 | Dr.25086.1.A1_at                                                                                                                                                                                                                                        |              |                                                                                                                             | 6     | 11    | -1     | tcgctg   |        |
| ENSDARG00000020190 | ENSDART00000003437 | Dr.25086.1.A1_at                                                                                                                                                                                                                                        |              |                                                                                                                             | -2407 | -2402 | -1     | agcgtg   |        |
| ENSDARG00000020485 | ENSDART00000011573 | Dr.10314.1.S1_a_at                                                                                                                                                                                                                                      |              |                                                                                                                             | -4030 | -4025 | 1      | ggcgtg   |        |
| ENSDARG00000020485 | ENSDART00000011573 | Dr.10314.1.S1_a_at                                                                                                                                                                                                                                      |              |                                                                                                                             | -3871 | -3866 | -1     | tcgctg   |        |
| ENSDARG00000020485 | ENSDART00000011573 | Dr.10314.1.S1_a_at                                                                                                                                                                                                                                      |              |                                                                                                                             | -3757 | -3752 | 1      | agcgtg   |        |
| ENSDARG00000020485 | ENSDART00000011573 | Dr.10314.1.S1_a_at                                                                                                                                                                                                                                      |              |                                                                                                                             | -4843 | -4838 | -1     | ggcgtg   |        |
| ENSDARG00000020485 | ENSDART00000011573 | Dr.10314.1.S1_a_at                                                                                                                                                                                                                                      |              |                                                                                                                             | -1953 | -1948 | 1      | tcgctg   |        |
| ENSDARG00000020893 | ENSDART00000004693 | Dr.17850.1.S1_at                                                                                                                                                                                                                                        | zgc:56592    | zgc:56592 [Source:RefSeq_peptide;Acc:NP_998573]                                                                             | -1091 | -1086 | 1      | ggcgtg   |        |
| ENSDARG00000020893 | ENSDART00000004693 | Dr.17850.1.S1_at                                                                                                                                                                                                                                        | zgc:56592    | zgc:56592 [Source:RefSeq_peptide;Acc:NP_998573]                                                                             | -1911 | -1906 | 1      | ggcgtg   |        |
| ENSDARG00000021443 | ENSDART00000014168 | Dr.24122.1.A1_at                                                                                                                                                                                                                                        | NP_955943.1  | CCCH zinc finger protein C3H-2 [Source:RefSeq_peptide;Acc:NP_955943]                                                        | -4527 | -4522 | -1     | cgctgt   |        |
| ENSDARG00000021443 | ENSDART00000014168 | Dr.24122.1.A1_at                                                                                                                                                                                                                                        | NP_955943.1  | CCCH zinc finger protein C3H-2 [Source:RefSeq_peptide;Acc:NP_955943]                                                        | -3319 | -3314 | 1      | cgctgt   |        |
| ENSDARG00000022295 | ENSDART00000029465 | Dr.15418.1.S1_at                                                                                                                                                                                                                                        | wu:fc23f06   | transcription factor 2 like protein [Source:RefSeq_peptide;Acc:NP_919353]                                                   | -71   | -66   | 1      | ggcgtg   |        |
| ENSDARG00000022295 | ENSDART00000029465 | Dr.15418.1.S1_at                                                                                                                                                                                                                                        | wu:fc23f06   | transcription factor 2 like protein [Source:RefSeq_peptide;Acc:NP_919353]                                                   | -4671 | -4666 | 1      | ggcgtg   |        |
| ENSDARG00000022767 | ENSDART00000028709 | Dr.5662.1.S1_at                                                                                                                                                                                                                                         | Q5BLC2_BRARE | Novel protein similar to vertebrate apolipoprotein B (Including Ag(X) antigen) (APOB). [Source:Uniprot/SPTREMBL;Acc:Q5TZ29] | -152  | -147  | 1      | agcgtg   |        |
| ENSDARG00000022767 | ENSDART00000028709 | Dr.5662.1.S1_at                                                                                                                                                                                                                                         | Q5BLC2_BRARE | Novel protein similar to vertebrate apolipoprotein B (Including Ag(X) antigen) (APOB). [Source:Uniprot/SPTREMBL;Acc:Q5TZ29] | -2584 | -2579 | -1     | tcgctg   |        |
| ENSDARG00000023820 | ENSDART00000038657 | Dr.8390.1.S1_at                                                                                                                                                                                                                                         | zgc:55420    | hypothetical protein LOC406828 [Source:RefSeq_peptide;Acc:NP_998672]                                                        | -780  | -775  | 1      | tcgctg   |        |
| ENSDARG00000023820 | ENSDART00000038657 | Dr.8390.1.S1_at                                                                                                                                                                                                                                         | zgc:55420    | hypothetical protein LOC406828 [Source:RefSeq_peptide;Acc:NP_998672]                                                        | -3618 | -3613 | 1      | agcgtg   |        |
| ENSDARG00000023820 | ENSDART00000038657 | Dr.8390.1.S1_at                                                                                                                                                                                                                                         | zgc:55420    | hypothetical protein LOC406828 [Source:RefSeq_peptide;Acc:NP_998672]                                                        | -3588 | -3583 | -1     | agcgtg   |        |
| ENSDARG00000023820 | ENSDART00000038657 | Dr.8390.1.S1_at                                                                                                                                                                                                                                         | zgc:55420    | hypothetical protein LOC406828 [Source:RefSeq_peptide;Acc:NP_998672]                                                        | -2611 | -2606 | -1     | agcgtg   |        |
| ENSDARG00000023820 | ENSDART00000038657 | Dr.8390.1.S1_at                                                                                                                                                                                                                                         | zgc:55420    | hypothetical protein LOC406828 [Source:RefSeq_peptide;Acc:NP_998672]                                                        | -2515 | -2510 | -1     | tcgctg   |        |
| ENSDARG00000023820 | ENSDART00000038657 | Dr.8390.1.S1_at                                                                                                                                                                                                                                         | zgc:55420    | hypothetical protein LOC406828 [Source:RefSeq_peptide;Acc:NP_998672]                                                        | -4711 | -4706 | 1      | tcgctg   |        |
| ENSDARG00000023820 | ENSDART00000038657 | Dr.8390.1.S1_at                                                                                                                                                                                                                                         | zgc:55420    | hypothetical protein LOC406828 [Source:RefSeq_peptide;Acc:NP_998672]                                                        | -1933 | -1928 | 1      | tcgctg   |        |
| ENSDARG00000023820 | ENSDART00000038657 | Dr.8390.1.S1_at                                                                                                                                                                                                                                         | zgc:55420    | hypothetical protein LOC406828 [Source:RefSeq_peptide;Acc:NP_998672]                                                        | -1521 | -1516 | 1      | cgctgt   |        |
| ENSDARG00000023820 | ENSDART00000038657 | Dr.8390.1.S1_at                                                                                                                                                                                                                                         | zgc:55420    | hypothetical protein LOC406828 [Source:RefSeq_peptide;Acc:NP_998672]                                                        | -162  | -157  | -1     | tcgctg   |        |
| ENSDARG00000024407 | ENSDART00000033943 | Dr.16681.1.A1_at                                                                                                                                                                                                                                        | mamd1        | Novel protein (Fragment). [Source:Uniprot/SPTREMBL;Acc:Q7ZZ84]                                                              | -2931 | -2926 | 1      | tcgctg   |        |
| ENSDARG00000024407 | ENSDART00000033943 | Dr.16681.1.A1_at                                                                                                                                                                                                                                        | mamd1        | Novel protein (Fragment). [Source:Uniprot/SPTREMBL;Acc:Q7ZZ84]                                                              | -2240 | -2235 | -1     | tcgctg   |        |
| ENSDARG00000024480 | ENSDART00000034117 | Dr.3512.1.A1_at                                                                                                                                                                                                                                         | Q6NWE8_BRARE | Hypothetical protein (Fragment). [Source:Uniprot/SPTREMBL;Acc:Q6NWE8]                                                       | -1626 | -1621 | 1      | agcgtg   |        |
| ENSDARG00000024480 | ENSDART00000034117 | Dr.3512.1.A1_at                                                                                                                                                                                                                                         | Q6NWE8_BRARE | Hypothetical protein (Fragment). [Source:Uniprot/SPTREMBL;Acc:Q6NWE8]                                                       | -1593 | -1588 | -1     | tcgctg   |        |
| ENSDARG00000024480 | ENSDART00000034117 | Dr.3512.1.A1_at                                                                                                                                                                                                                                         | Q6NWE8_BRARE | Hypothetical protein (Fragment). [Source:Uniprot/SPTREMBL;Acc:Q6NWE8]                                                       | -1573 | -1568 | -1     | tcgctg   |        |
| ENSDARG00000024480 | ENSDART00000034117 | Dr.3512.1.A1_at                                                                                                                                                                                                                                         | Q6NWE8_BRARE | Hypothetical protein (Fragment). [Source:Uniprot/SPTREMBL;Acc:Q6NWE8]                                                       | -1569 | -1564 | -1     | tcgctg   |        |
| ENSDARG00000024480 | ENSDART00000034117 | Dr.3512.1.A1_at                                                                                                                                                                                                                                         | Q6NWE8_BRARE | Hypothetical protein (Fragment). [Source:Uniprot/SPTREMBL;Acc:Q6NWE8]                                                       | -1565 | -1560 | -1     | tcgctg   |        |
|                    |                    | Dr.3025.2.S1_at,Dr.3025.3.S1_at,Dr.25379.1.S1_at,Dr.25379.1.S1_at,Dr.25379.1.S1_at,Dr.3025.3.S1_at                                                                                                                                                      |              |                                                                                                                             |       |       |        |          |        |
| ENSDARG00000024892 | ENSDART00000033228 | .2.S1_at,Dr.3025.3.S1_at,Dr.25379.1.S1_at,Dr.3025.1.A1_at,Dr.3025.3.S1_at,Dr.3025.2.S1_at,Dr.3025.3.S1_at,Dr.25379.1.S1_at,Dr.25379.1.S1_at,Dr.3025.3.S1_at                                                                                             |              |                                                                                                                             | -3817 | -3812 | -1     | agcgtg   |        |
| ENSDARG00000024892 | ENSDART00000033228 | .2.S1_at,Dr.3025.3.S1_at,Dr.25379.1.S1_at,Dr.3025.1.A1_at,Dr.3025.3.S1_at,Dr.3025.2.S1_at,Dr.3025.3.S1_at,Dr.25379.1.S1_at,Dr.25379.1.S1_at,Dr.3025.3.S1_at                                                                                             |              |                                                                                                                             | -3698 | -3693 | -1     | agcgtg   |        |
| ENSDARG00000024892 | ENSDART00000033228 | .2.S1_at,Dr.3025.3.S1_at,Dr.25379.1.S1_at,Dr.3025.1.A1_at,Dr.3025.3.S1_at,Dr.3025.2.S1_at,Dr.3025.3.S1_at,Dr.25379.1.S1_at,Dr.25379.1.S1_at,Dr.3025.3.S1_at                                                                                             |              |                                                                                                                             | -2476 | -2471 | -1     | cgctgt   |        |
| ENSDARG00000024892 | ENSDART00000033228 | .2.S1_at,Dr.3025.3.S1_at,Dr.25379.1.S1_at,Dr.3025.1.A1_at,Dr.3025.3.S1_at,Dr.3025.2.S1_at,Dr.3025.3.S1_at,Dr.25379.1.S1_at,Dr.25379.1.S1_at,Dr.3025.3.S1_at                                                                                             |              |                                                                                                                             | -4576 | -4571 | 1      | ggcgtg   |        |
| ENSDARG00000024892 | ENSDART00000033228 | .2.S1_at,Dr.3025.3.S1_at,Dr.25379.1.S1_at,Dr.3025.1.A1_at,Dr.3025.3.S1_at,Dr.3025.2.S1_at,Dr.3025.3.S1_at,Dr.25379.1.S1_at,Dr.25379.1.S1_at,Dr.3025.3.S1_at                                                                                             |              |                                                                                                                             | -4314 | -4309 | 1      | agcgtg   |        |
| ENSDARG00000024892 | ENSDART00000033228 | .2.S1_at,Dr.3025.3.S1_at,Dr.25379.1.S1_at,Dr.3025.1.A1_at,Dr.3025.3.S1_at                                                                                                                                                                               |              |                                                                                                                             | -4209 | -4204 | 1      | tcgctg   |        |



Supplementary Table 2 (cont.). Location of putative AHRES

| Gene ID            | Transcript ID     | Affy IDs                                                                                                                                      | Symbol         | Description                                                             | Start | End   | Strand | Sequence |
|--------------------|-------------------|-----------------------------------------------------------------------------------------------------------------------------------------------|----------------|-------------------------------------------------------------------------|-------|-------|--------|----------|
| ENSDARG00000027088 | ENSART00000039267 | Dr.1192.1.S1_at,Dr.1192.1.S1_a_at                                                                                                             | wu:fb1h03      | prostaglandin D2 synthase [Source:RefSeq_peptide;Acc:NP_998799]         | -4658 | -4653 | 1      | tcgctg   |
| ENSDARG00000027088 | ENSART00000039267 | Dr.1192.1.S1_at,Dr.1192.1.S1_a_at                                                                                                             | wu:fb1h03      | prostaglandin D2 synthase [Source:RefSeq_peptide;Acc:NP_998799]         | -166  | -161  | -1     | tcgctg   |
| ENSDARG00000027088 | ENSART00000039267 | Dr.1192.1.S1_at,Dr.1192.1.S1_a_at                                                                                                             | wu:fb1h03      | prostaglandin D2 synthase [Source:RefSeq_peptide;Acc:NP_998799]         | -136  | -131  | 1      | tcgctg   |
| ENSDARG00000027088 | ENSART00000039267 | Dr.1192.1.S1_at,Dr.1192.1.S1_a_at                                                                                                             | wu:fb1h03      | prostaglandin D2 synthase [Source:RefSeq_peptide;Acc:NP_998799]         | -4658 | -4653 | 1      | tcgctg   |
| ENSDARG00000027088 | ENSART00000039267 | Dr.1192.1.S1_at,Dr.1192.1.S1_a_at                                                                                                             | wu:fb1h03      | prostaglandin D2 synthase [Source:RefSeq_peptide;Acc:NP_998799]         | -166  | -161  | -1     | tcgctg   |
| ENSDARG00000027088 | ENSART00000039267 | Dr.1192.1.S1_at,Dr.1192.1.S1_a_at                                                                                                             | wu:fb1h03      | prostaglandin D2 synthase [Source:RefSeq_peptide;Acc:NP_998799]         | -136  | -131  | 1      | tcgctg   |
| ENSDARG00000027669 | ENSART00000035274 | Dr.1991.1.A1_s_at                                                                                                                             | zgc:66417      | hypothetical protein LOC387303 [Source:RefSeq_peptide;Acc:NP_956419]    | -2874 | -2869 | 1      | tcgctg   |
| ENSDARG00000027669 | ENSART00000035274 | Dr.1991.1.A1_s_at                                                                                                                             | zgc:66417      | hypothetical protein LOC387303 [Source:RefSeq_peptide;Acc:NP_956419]    | -129  | -124  | -1     | ggcgtg   |
| ENSDARG00000027924 | ENSART00000024900 | 593.1.S1_at,Dr.4412.12.A1_at,Dr.25527.1.A1_x_at,Dr.25527.1.A1_at<br>Dr.25593.2.A1_at,Dr.25593.1.S1_at,Dr.4412.12.A1_at,Dr.25593.2.A1_at,Dr.25 |                |                                                                         | -3372 | -3367 | -1     | agcgtg   |
| ENSDARG00000027924 | ENSART00000024900 | 593.1.S1_at,Dr.4412.12.A1_at,Dr.25527.1.A1_x_at,Dr.25527.1.A1_at<br>Dr.25593.2.A1_at,Dr.25593.1.S1_at,Dr.4412.12.A1_at,Dr.25593.2.A1_at,Dr.25 |                |                                                                         | -2691 | -2686 | -1     | agcgtg   |
| ENSDARG00000027924 | ENSART00000024900 | 593.1.S1_at,Dr.4412.12.A1_at,Dr.25527.1.A1_x_at,Dr.25527.1.A1_at<br>Dr.25593.2.A1_at,Dr.25593.1.S1_at,Dr.4412.12.A1_at,Dr.25593.2.A1_at,Dr.25 |                |                                                                         | -1910 | -1905 | 1      | tcgctg   |
| ENSDARG00000027924 | ENSART00000024900 | 593.1.S1_at,Dr.4412.12.A1_at,Dr.25527.1.A1_x_at,Dr.25527.1.A1_at<br>Dr.25593.2.A1_at,Dr.25593.1.S1_at,Dr.4412.12.A1_at,Dr.25593.2.A1_at,Dr.25 |                |                                                                         | -4427 | -4422 | 1      | cgcgtg   |
| ENSDARG00000027924 | ENSART00000047994 | 593.1.S1_at,Dr.4412.12.A1_at,Dr.25527.1.A1_x_at,Dr.25527.1.A1_at<br>Dr.25593.2.A1_at,Dr.25593.1.S1_at,Dr.4412.12.A1_at,Dr.25593.2.A1_at,Dr.25 |                |                                                                         | -4195 | -4190 | 1      | tcgctg   |
| ENSDARG00000027924 | ENSART00000024900 | 593.1.S1_at,Dr.4412.12.A1_at,Dr.25527.1.A1_x_at,Dr.25527.1.A1_at<br>Dr.25593.2.A1_at,Dr.25593.1.S1_at,Dr.4412.12.A1_at,Dr.25593.2.A1_at,Dr.25 |                |                                                                         | -3372 | -3367 | -1     | agcgtg   |
| ENSDARG00000027924 | ENSART00000024900 | 593.1.S1_at,Dr.4412.12.A1_at,Dr.25527.1.A1_x_at,Dr.25527.1.A1_at<br>Dr.25593.2.A1_at,Dr.25593.1.S1_at,Dr.4412.12.A1_at,Dr.25593.2.A1_at,Dr.25 |                |                                                                         | -2691 | -2686 | -1     | agcgtg   |
| ENSDARG00000027924 | ENSART00000024900 | 593.1.S1_at,Dr.4412.12.A1_at,Dr.25527.1.A1_x_at,Dr.25527.1.A1_at<br>Dr.25593.2.A1_at,Dr.25593.1.S1_at,Dr.4412.12.A1_at,Dr.25593.2.A1_at,Dr.25 |                |                                                                         | -1910 | -1905 | 1      | tcgctg   |
| ENSDARG00000027924 | ENSART00000024900 | 593.1.S1_at,Dr.4412.12.A1_at,Dr.25527.1.A1_x_at,Dr.25527.1.A1_at<br>Dr.25593.2.A1_at,Dr.25593.1.S1_at,Dr.4412.12.A1_at,Dr.25593.2.A1_at,Dr.25 |                |                                                                         | -4427 | -4422 | 1      | cgcgtg   |
| ENSDARG00000027924 | ENSART00000047994 | 593.1.S1_at,Dr.4412.12.A1_at,Dr.25527.1.A1_x_at,Dr.25527.1.A1_at<br>Dr.25593.2.A1_at,Dr.25593.1.S1_at,Dr.4412.12.A1_at,Dr.25593.2.A1_at,Dr.25 |                |                                                                         | -4195 | -4190 | 1      | tcgctg   |
| ENSDARG00000027924 | ENSART00000024900 | 593.1.S1_at,Dr.4412.12.A1_at,Dr.25527.1.A1_x_at,Dr.25527.1.A1_at<br>Dr.25593.2.A1_at,Dr.25593.1.S1_at,Dr.4412.12.A1_at,Dr.25593.2.A1_at,Dr.25 |                |                                                                         | -3372 | -3367 | -1     | agcgtg   |
| ENSDARG00000027924 | ENSART00000024900 | 593.1.S1_at,Dr.4412.12.A1_at,Dr.25527.1.A1_x_at,Dr.25527.1.A1_at<br>Dr.25593.2.A1_at,Dr.25593.1.S1_at,Dr.4412.12.A1_at,Dr.25593.2.A1_at,Dr.25 |                |                                                                         | -2691 | -2686 | -1     | agcgtg   |
| ENSDARG00000027924 | ENSART00000024900 | 593.1.S1_at,Dr.4412.12.A1_at,Dr.25527.1.A1_x_at,Dr.25527.1.A1_at<br>Dr.25593.2.A1_at,Dr.25593.1.S1_at,Dr.4412.12.A1_at,Dr.25593.2.A1_at,Dr.25 |                |                                                                         | -1910 | -1905 | 1      | tcgctg   |
| ENSDARG00000027924 | ENSART00000024900 | 593.1.S1_at,Dr.4412.12.A1_at,Dr.25527.1.A1_x_at,Dr.25527.1.A1_at<br>Dr.25593.2.A1_at,Dr.25593.1.S1_at,Dr.4412.12.A1_at,Dr.25593.2.A1_at,Dr.25 |                |                                                                         | -4427 | -4422 | 1      | cgcgtg   |
| ENSDARG00000027924 | ENSART00000047994 | 593.1.S1_at,Dr.4412.12.A1_at,Dr.25527.1.A1_x_at,Dr.25527.1.A1_at<br>Dr.25593.2.A1_at,Dr.25593.1.S1_at,Dr.4412.12.A1_at,Dr.25593.2.A1_at,Dr.25 |                |                                                                         | -4195 | -4190 | 1      | tcgctg   |
| ENSDARG00000027924 | ENSART00000024900 | 593.1.S1_at,Dr.4412.12.A1_at,Dr.25527.1.A1_x_at,Dr.25527.1.A1_at<br>Dr.25593.2.A1_at,Dr.25593.1.S1_at,Dr.4412.12.A1_at,Dr.25593.2.A1_at,Dr.25 |                |                                                                         | -3372 | -3367 | -1     | agcgtg   |
| ENSDARG00000027924 | ENSART00000024900 | 593.1.S1_at,Dr.4412.12.A1_at,Dr.25527.1.A1_x_at,Dr.25527.1.A1_at<br>Dr.25593.2.A1_at,Dr.25593.1.S1_at,Dr.4412.12.A1_at,Dr.25593.2.A1_at,Dr.25 |                |                                                                         | -2691 | -2686 | -1     | agcgtg   |
| ENSDARG00000027924 | ENSART00000024900 | 593.1.S1_at,Dr.4412.12.A1_at,Dr.25527.1.A1_x_at,Dr.25527.1.A1_at<br>Dr.25593.2.A1_at,Dr.25593.1.S1_at,Dr.4412.12.A1_at,Dr.25593.2.A1_at,Dr.25 |                |                                                                         | -1910 | -1905 | 1      | tcgctg   |
| ENSDARG00000027924 | ENSART00000024900 | 593.1.S1_at,Dr.4412.12.A1_at,Dr.25527.1.A1_x_at,Dr.25527.1.A1_at<br>Dr.25593.2.A1_at,Dr.25593.1.S1_at,Dr.4412.12.A1_at,Dr.25593.2.A1_at,Dr.25 |                |                                                                         | -4427 | -4422 | 1      | cgcgtg   |
| ENSDARG00000027924 | ENSART00000047994 | 593.1.S1_at,Dr.4412.12.A1_at,Dr.25527.1.A1_x_at,Dr.25527.1.A1_at<br>Dr.25593.2.A1_at,Dr.25593.1.S1_at,Dr.4412.12.A1_at,Dr.25593.2.A1_at,Dr.25 |                |                                                                         | -4195 | -4190 | 1      | tcgctg   |
| ENSDARG00000027924 | ENSART00000024900 | 593.1.S1_at,Dr.4412.12.A1_at,Dr.25527.1.A1_x_at,Dr.25527.1.A1_at<br>Dr.25593.2.A1_at,Dr.25593.1.S1_at,Dr.4412.12.A1_at,Dr.25593.2.A1_at,Dr.25 |                |                                                                         | -3372 | -3367 | -1     | agcgtg   |
| ENSDARG00000027924 | ENSART00000024900 | 593.1.S1_at,Dr.4412.12.A1_at,Dr.25527.1.A1_x_at,Dr.25527.1.A1_at<br>Dr.25593.2.A1_at,Dr.25593.1.S1_at,Dr.4412.12.A1_at,Dr.25593.2.A1_at,Dr.25 |                |                                                                         | -2691 | -2686 | -1     | agcgtg   |
| ENSDARG00000027924 | ENSART00000024900 | 593.1.S1_at,Dr.4412.12.A1_at,Dr.25527.1.A1_x_at,Dr.25527.1.A1_at<br>Dr.25593.2.A1_at,Dr.25593.1.S1_at,Dr.4412.12.A1_at,Dr.25593.2.A1_at,Dr.25 |                |                                                                         | -1910 | -1905 | 1      | tcgctg   |
| ENSDARG00000027924 | ENSART00000024900 | 593.1.S1_at,Dr.4412.12.A1_at,Dr.25527.1.A1_x_at,Dr.25527.1.A1_at<br>Dr.25593.2.A1_at,Dr.25593.1.S1_at,Dr.4412.12.A1_at,Dr.25593.2.A1_at,Dr.25 |                |                                                                         | -4427 | -4422 | 1      | cgcgtg   |
| ENSDARG00000027924 | ENSART00000047994 | 593.1.S1_at,Dr.4412.12.A1_at,Dr.25527.1.A1_x_at,Dr.25527.1.A1_at<br>Dr.25593.2.A1_at,Dr.25593.1.S1_at,Dr.4412.12.A1_at,Dr.25593.2.A1_at,Dr.25 |                |                                                                         | -4195 | -4190 | 1      | tcgctg   |
| ENSDARG00000028618 | ENSART00000028260 | Dr.890.1.S1_at                                                                                                                                | zgc:77517      | hypothetical protein LOC393540 [Source:RefSeq_peptide;Acc:NP_956862]    | -3818 | -3813 | -1     | tcgctg   |
| ENSDARG00000028618 | ENSART00000028260 | Dr.890.1.S1_at                                                                                                                                | zgc:77517      | hypothetical protein LOC393540 [Source:RefSeq_peptide;Acc:NP_956862]    | -102  | -97   | 1      | cgcgtg   |
| ENSDARG00000028784 | ENSART00000044410 | Dr.12714.1.A1_at                                                                                                                              |                |                                                                         | -551  | -546  | -1     | agcgtg   |
| ENSDARG00000029086 | ENSART00000041921 | Dr.1282.1.S1_at                                                                                                                               | kr18           | keratin 8 [Source:RefSeq_peptide;Acc:NP_956374]                         | -3387 | -3382 | -1     | cgcgtg   |
| ENSDARG00000030236 | ENSART00000011928 | Dr.1368.7.S1_at                                                                                                                               | zgc:91877      | hypothetical protein LOC337397 [Source:RefSeq_peptide;Acc:NP_997941]    | -1028 | -1023 | -1     | tcgctg   |
| ENSDARG00000030236 | ENSART00000011928 | Dr.1368.7.S1_at                                                                                                                               | zgc:91877      | hypothetical protein LOC337397 [Source:RefSeq_peptide;Acc:NP_997941]    | 77    | 82    | -1     | agcgtg   |
| ENSDARG00000030662 | ENSART00000048550 | Dr.9682.1.A1_at                                                                                                                               |                |                                                                         | -3682 | -3677 | 1      | tcgctg   |
| ENSDARG00000030662 | ENSART00000048550 | Dr.9682.1.A1_at                                                                                                                               |                |                                                                         | -1444 | -1439 | 1      | cgcgtg   |
| ENSDARG00000030662 | ENSART00000048550 | Dr.9682.1.A1_at                                                                                                                               |                |                                                                         | -301  | -296  | -1     | tcgctg   |
| ENSDARG00000030662 | ENSART00000048550 | Dr.9682.1.A1_at                                                                                                                               |                |                                                                         | -4904 | -4899 | -1     | agcgtg   |
| ENSDARG00000031664 | ENSART00000049339 | Dr.8215.1.A1_at                                                                                                                               | sox21a         | SRY-box 21 [Source:RefSeq_peptide;Acc:NP_571361]                        | -2414 | -2409 | 1      | agcgtg   |
| ENSDARG00000031664 | ENSART00000049339 | Dr.8215.1.A1_at                                                                                                                               | sox21a         | SRY-box 21 [Source:RefSeq_peptide;Acc:NP_571361]                        | -311  | -306  | -1     | ggcgtg   |
| ENSDARG00000031664 | ENSART00000049339 | Dr.8215.1.A1_at                                                                                                                               | sox21a         | SRY-box 21 [Source:RefSeq_peptide;Acc:NP_571361]                        | -213  | -208  | 1      | cgcgtg   |
| ENSDARG00000031854 | ENSART00000043418 | Dr.7688.1.A1_at,Dr.7688.1.A1_at                                                                                                               |                |                                                                         | -4616 | -4611 | -1     | tcgctg   |
| ENSDARG00000031854 | ENSART00000043418 | Dr.7688.1.A1_at,Dr.7688.1.A1_at                                                                                                               |                |                                                                         | -769  | -764  | 1      | cgcgtg   |
| ENSDARG00000031854 | ENSART00000043418 | Dr.7688.1.A1_at,Dr.7688.1.A1_at                                                                                                               |                |                                                                         | -545  | -540  | -1     | ggcgtg   |
| ENSDARG00000031854 | ENSART00000050805 | Dr.7688.1.A1_at,Dr.7688.1.A1_at                                                                                                               |                |                                                                         | -4616 | -4611 | -1     | tcgctg   |
| ENSDARG00000031854 | ENSART00000050805 | Dr.7688.1.A1_at,Dr.7688.1.A1_at                                                                                                               |                |                                                                         | -769  | -764  | 1      | cgcgtg   |
| ENSDARG00000031854 | ENSART00000050805 | Dr.7688.1.A1_at,Dr.7688.1.A1_at                                                                                                               |                |                                                                         | -545  | -540  | -1     | ggcgtg   |
| ENSDARG00000033770 | ENSART00000011961 | Dr.25009.6.A1_a_at                                                                                                                            | vg1            | Vitellogenin 1 (Fragment). [Source:Uniprot/SPTREMBL;Acc:Q8JH36]         | -3386 | -3381 | -1     | cgcgtg   |
| ENSDARG00000033770 | ENSART00000011961 | Dr.25009.6.A1_a_at                                                                                                                            | vg1            | Vitellogenin 1 (Fragment). [Source:Uniprot/SPTREMBL;Acc:Q8JH36]         | -2983 | -2978 | 1      | ggcgtg   |
| ENSDARG00000033770 | ENSART00000011961 | Dr.25009.6.A1_a_at                                                                                                                            | vg1            | Vitellogenin 1 (Fragment). [Source:Uniprot/SPTREMBL;Acc:Q8JH36]         | -2703 | -2698 | -1     | tcgctg   |
| ENSDARG00000033770 | ENSART00000011961 | Dr.25009.6.A1_a_at                                                                                                                            | vg1            | Vitellogenin 1 (Fragment). [Source:Uniprot/SPTREMBL;Acc:Q8JH36]         | -2417 | -2412 | -1     | tcgctg   |
| ENSDARG00000033770 | ENSART00000011961 | Dr.25009.6.A1_a_at                                                                                                                            | vg1            | Vitellogenin 1 (Fragment). [Source:Uniprot/SPTREMBL;Acc:Q8JH36]         | -2381 | -2376 | 1      | tcgctg   |
| ENSDARG00000033770 | ENSART00000011961 | Dr.25009.6.A1_a_at                                                                                                                            | vg1            | Vitellogenin 1 (Fragment). [Source:Uniprot/SPTREMBL;Acc:Q8JH36]         | -1870 | -1865 | 1      | tcgctg   |
| ENSDARG00000033770 | ENSART00000011961 | Dr.25009.6.A1_a_at                                                                                                                            | vg1            | Vitellogenin 1 (Fragment). [Source:Uniprot/SPTREMBL;Acc:Q8JH36]         | -4407 | -4402 | -1     | ggcgtg   |
| ENSDARG00000033770 | ENSART00000011961 | Dr.25009.6.A1_a_at                                                                                                                            | vg1            | Vitellogenin 1 (Fragment). [Source:Uniprot/SPTREMBL;Acc:Q8JH36]         | -4306 | -4301 | 1      | cgcgtg   |
| ENSDARG00000033949 | ENSART00000045135 | Dr.18466.1.A1_at                                                                                                                              | NP_001017680.1 | hypothetical protein LOC550375 [Source:RefSeq_peptide;Acc:NP_001017680] | -3737 | -3732 | 1      | tcgctg   |
| ENSDARG00000033949 | ENSART00000045135 | Dr.18466.1.A1_at                                                                                                                              | NP_001017680.1 | hypothetical protein LOC550375 [Source:RefSeq_peptide;Acc:NP_001017680] | -1464 | -1459 | 1      | agcgtg   |
| ENSDARG00000034351 | ENSART00000043771 | Dr.23631.1.S1_at                                                                                                                              | tagln2         | transgelin 2 [Source:RefSeq_peptide;Acc:NP_963870]                      | -1492 | -1487 | 1      | agcgtg   |
| ENSDARG00000035160 | ENSART00000050933 | Dr.13775.1.S1_at                                                                                                                              |                |                                                                         | -40   | -35   | 1      | agcgtg   |
| ENSDARG00000035666 | ENSART00000051733 | Dr.4797.1.S1_at                                                                                                                               | Q6DGW1_BRARE   | Hypothetical protein (Fragment). [Source:Uniprot/SPTREMBL;Acc:Q6DGW1]   | -3118 | -3113 | -1     | ggcgtg   |
| ENSDARG00000035666 | ENSART00000051733 | Dr.4797.1.S1_at                                                                                                                               | Q6DGW1_BRARE   | Hypothetical protein (Fragment). [Source:Uniprot/SPTREMBL;Acc:Q6DGW1]   | -3045 | -3040 | 1      | agcgtg   |
| ENSDARG00000035666 | ENSART00000051733 | Dr.4797.1.S1_at                                                                                                                               | Q6DGW1_BRARE   | Hypothetical protein (Fragment). [Source:Uniprot/SPTREMBL;Acc:Q6DGW1]   | -1406 | -1401 | 1      | ggcgtg   |
| ENSDARG00000035666 | ENSART00000051733 | Dr.4797.1.S1_at                                                                                                                               | Q6DGW1_BRARE   | Hypothetical protein (Fragment). [Source:Uniprot/SPTREMBL;Acc:Q6DGW1]   | -859  | -854  | 1      | tcgctg   |
| ENSDARG00000035743 | ENSART00000051853 | Dr.14748.1.S1_at                                                                                                                              | zgc:63985      | Unknown (protein for MGC:63985) [Source:RefSeq_peptide;Acc:NP_956252]   | -1043 | -1038 | 1      | agcgtg   |
| ENSDARG00000036082 | ENSART00000052385 | Dr.15819.1.A1_at,Dr.17776.1.A1_at                                                                                                             | NP_001001843.1 | tryptophan hydroxylase 1, like [Source:RefSeq_peptide;Acc:NP_001001843] | -3632 | -3627 | 1      | tcgctg   |
| ENSDARG00000036082 | ENSART00000052385 | Dr.15819.1.A1_at,Dr.17776.1.A1_at                                                                                                             | NP_001001843.1 | tryptophan hydroxylase 1, like [Source:RefSeq_peptide;Acc:NP_001001843] | -1852 | -1847 | 1      | agcgtg   |
| ENSDARG00000036082 | ENSART00000052385 | Dr.15819.1.A1_at,Dr.17776.1.A1_at                                                                                                             | NP_001001843.1 | tryptophan hydroxylase 1, like [Source:RefSeq_peptide;Acc:NP_001001843] | -1701 | -1696 | -1     | agcgtg   |

Supplementary Table 2 (cont.). Location of putative AHRES

| Gene ID           | Transcript ID     | Affy IDs                                                                 | Symbol           | Description                                                                                               | Start | End   | Strand | Sequence |
|-------------------|-------------------|--------------------------------------------------------------------------|------------------|-----------------------------------------------------------------------------------------------------------|-------|-------|--------|----------|
| ENSDARG0000036082 | ENSDART0000052385 | Dr.15819.1.A1_at,Dr.17776.1.A1_at                                        | NP_001001843.1   | tryptophan hydroxylase 1, like [Source:RefSeq_peptide;Acc:NP_001001843]                                   | -240  | -235  | -1     | agcgtg   |
| ENSDARG0000036082 | ENSDART0000052385 | Dr.15819.1.A1_at,Dr.17776.1.A1_at                                        | NP_001001843.1   | tryptophan hydroxylase 1, like [Source:RefSeq_peptide;Acc:NP_001001843]                                   | -56   | -51   | 1      | cgcggt   |
| ENSDARG0000036470 | ENSDART0000052991 | Dr.10326.1.S1_at                                                         | junb             | jun B proto-oncogene [Source:RefSeq_peptide;Acc:NP_998721]                                                | -66   | -61   | -1     | ggcggt   |
| ENSDARG0000036481 | ENSDART0000053001 | Dr.6550.1.A1_at                                                          | Q6PG35_BRARE     | LOC407646 protein (Fragment). [Source:Uniprot/SPTREMBL;Acc:Q6PG35]                                        | -4651 | -4646 | -1     | tcgctg   |
| ENSDARG0000036517 | ENSDART0000053070 | Dr.14111.1.S1_at                                                         | si:xx-by187g17.1 | Novel protein similar to zebrafish hemoglobin alpha-adult 1 (Hbaa1). [Source:Uniprot/SPTREMBL;Acc:Q6ZM17] | -2107 | -2102 | -1     | tcgctg   |
| ENSDARG0000036517 | ENSDART0000053070 | Dr.14111.1.S1_at                                                         | si:xx-by187g17.1 | Novel protein similar to zebrafish hemoglobin alpha-adult 1 (Hbaa1). [Source:Uniprot/SPTREMBL;Acc:Q6ZM17] | -4586 | -4581 | 1      | tcgctg   |
| ENSDARG0000036518 | ENSDART0000043748 | Dr.25155.1.S1_s_at                                                       | ba2l             | Hemoglobin beta-1 chain (BetaA1 globin). [Source:Uniprot/SWISSPROT;Acc:Q90486]                            | -3361 | -3356 | 1      | tcgctg   |
| ENSDARG0000036518 | ENSDART0000043748 | Dr.25155.1.S1_s_at                                                       | ba2l             | Hemoglobin beta-1 chain (BetaA1 globin). [Source:Uniprot/SWISSPROT;Acc:Q90486]                            | -1341 | -1336 | -1     | tcgctg   |
| ENSDARG0000036518 | ENSDART0000043748 | Dr.25155.1.S1_s_at                                                       | ba2l             | Hemoglobin beta-1 chain (BetaA1 globin). [Source:Uniprot/SWISSPROT;Acc:Q90486]                            | -4481 | -4476 | -1     | tcgctg   |
| ENSDARG0000036519 | ENSDART0000053072 | Dr.14111.1.S1_at                                                         | hbaa1            | Hemoglobin alpha chain (Alpha globin aa1). [Source:Uniprot/SWISSPROT;Acc:Q90487]                          | -2950 | -2945 | 1      | cgcggt   |
| ENSDARG0000036521 | ENSDART0000053073 | Dr.25155.1.S1_s_at                                                       | ba2l             | Hemoglobin beta-1 chain (BetaA1 globin). [Source:Uniprot/SWISSPROT;Acc:Q90486]                            | -3811 | -3806 | 1      | tcgctg   |
| ENSDARG0000036521 | ENSDART0000053073 | Dr.25155.1.S1_s_at                                                       | ba2              | Hemoglobin beta-1 chain (BetaA1 globin). [Source:Uniprot/SWISSPROT;Acc:Q90486]                            | -1332 | -1327 | -1     | tcgctg   |
| ENSDARG0000036527 | ENSDART0000053078 | Dr.14111.1.S1_at                                                         | si:xx-by187g17.1 | hemoglobin alpha adult-1 (hbaa1), mRNA [Source:RefSeq_dna;Acc:NM_131257]                                  | -2104 | -2099 | -1     | tcgctg   |
| ENSDARG0000036527 | ENSDART0000053078 | Dr.14111.1.S1_at                                                         | si:xx-by187g17.1 | hemoglobin alpha adult-1 (hbaa1), mRNA [Source:RefSeq_dna;Acc:NM_131257]                                  | -4583 | -4578 | 1      | tcgctg   |
| ENSDARG0000036528 | ENSDART0000053080 | Dr.8723.1.S1_at                                                          | NP_001002461.1   | zgc:92903 [Source:RefSeq_peptide;Acc:NP_001002461]                                                        | -1100 | -1095 | -1     | agcgtg   |
| ENSDARG0000036528 | ENSDART0000053080 | Dr.8723.1.S1_at                                                          | NP_001002461.1   | zgc:92903 [Source:RefSeq_peptide;Acc:NP_001002461]                                                        | -48   | -43   | 1      | tcgctg   |
| ENSDARG0000036529 | ENSDART0000053081 | Dr.25155.1.S1_s_at                                                       | ba2l             | Hemoglobin beta-1 chain (BetaA1 globin). [Source:Uniprot/SWISSPROT;Acc:Q90486]                            | -3358 | -3353 | 1      | tcgctg   |
| ENSDARG0000036529 | ENSDART0000053081 | Dr.25155.1.S1_s_at                                                       | ba2l             | Hemoglobin beta-1 chain (BetaA1 globin). [Source:Uniprot/SWISSPROT;Acc:Q90486]                            | -1341 | -1336 | -1     | tcgctg   |
| ENSDARG0000036529 | ENSDART0000053081 | Dr.25155.1.S1_s_at                                                       | ba2l             | Hemoglobin beta-1 chain (BetaA1 globin). [Source:Uniprot/SWISSPROT;Acc:Q90486]                            | -4476 | -4471 | -1     | tcgctg   |
| ENSDARG0000036531 | ENSDART0000053083 | Dr.14111.1.S1_at                                                         | hbaa1            | Hemoglobin alpha chain (Alpha globin aa1). [Source:Uniprot/SWISSPROT;Acc:Q90487]                          | -2943 | -2938 | 1      | cgcggt   |
| ENSDARG0000036533 | ENSDART0000053086 | Dr.10170.1.A1_at,Dr.10170.1.A1_at                                        |                  |                                                                                                           | -3938 | -3933 | -1     | cgcggt   |
| ENSDARG0000036533 | ENSDART0000053086 | Dr.10170.1.A1_at,Dr.10170.1.A1_at                                        |                  |                                                                                                           | -3823 | -3818 | -1     | tcgctg   |
| ENSDARG0000036533 | ENSDART0000053086 | Dr.10170.1.A1_at,Dr.10170.1.A1_at                                        |                  |                                                                                                           | -3765 | -3760 | 1      | ggcggt   |
| ENSDARG0000036533 | ENSDART0000053086 | Dr.10170.1.A1_at,Dr.10170.1.A1_at                                        |                  |                                                                                                           | -3350 | -3345 | 1      | agcgtg   |
| ENSDARG0000036533 | ENSDART0000053086 | Dr.10170.1.A1_at,Dr.10170.1.A1_at                                        |                  |                                                                                                           | -4669 | -4664 | 1      | agcgtg   |
| ENSDARG0000036533 | ENSDART0000053086 | Dr.10170.1.A1_at,Dr.10170.1.A1_at                                        |                  |                                                                                                           | -4994 | -4989 | -1     | ggcggt   |
| ENSDARG0000036533 | ENSDART0000053086 | Dr.10170.1.A1_at,Dr.10170.1.A1_at                                        |                  |                                                                                                           | -4937 | -4932 | -1     | ggcggt   |
| ENSDARG0000036533 | ENSDART0000053087 | Dr.10170.1.A1_at,Dr.10170.1.A1_at                                        |                  |                                                                                                           | -3902 | -3897 | -1     | cgcggt   |
| ENSDARG0000036533 | ENSDART0000053087 | Dr.10170.1.A1_at,Dr.10170.1.A1_at                                        |                  |                                                                                                           | -3787 | -3782 | -1     | tcgctg   |
| ENSDARG0000036533 | ENSDART0000053087 | Dr.10170.1.A1_at,Dr.10170.1.A1_at                                        |                  |                                                                                                           | -3729 | -3724 | 1      | ggcggt   |
| ENSDARG0000036533 | ENSDART0000053087 | Dr.10170.1.A1_at,Dr.10170.1.A1_at                                        |                  |                                                                                                           | -3314 | -3309 | 1      | agcgtg   |
| ENSDARG0000036533 | ENSDART0000053087 | Dr.10170.1.A1_at,Dr.10170.1.A1_at                                        |                  |                                                                                                           | -4633 | -4628 | 1      | agcgtg   |
| ENSDARG0000036533 | ENSDART0000053087 | Dr.10170.1.A1_at,Dr.10170.1.A1_at                                        |                  |                                                                                                           | -4958 | -4953 | -1     | ggcggt   |
| ENSDARG0000036533 | ENSDART0000053087 | Dr.10170.1.A1_at,Dr.10170.1.A1_at                                        |                  |                                                                                                           | -4901 | -4896 | -1     | ggcggt   |
| ENSDARG0000036535 | ENSDART0000042396 | Dr.25155.1.S1_s_at                                                       | ba2              | Hemoglobin beta-1 chain (BetaA1 globin). [Source:Uniprot/SWISSPROT;Acc:Q90486]                            | -3804 | -3799 | 1      | tcgctg   |
| ENSDARG0000036535 | ENSDART0000042396 | Dr.25155.1.S1_s_at                                                       | ba2              | Hemoglobin beta-1 chain (BetaA1 globin). [Source:Uniprot/SWISSPROT;Acc:Q90486]                            | -1325 | -1320 | -1     | tcgctg   |
| ENSDARG0000037281 | ENSDART0000054230 | Dr.4907.1.S1_at                                                          | NP_998219.1      | fibrinogen gamma polypeptide [Source:RefSeq_peptide;Acc:NP_998219]                                        | -4801 | -4796 | 1      | cgcggt   |
| ENSDARG0000037618 | ENSDART0000054788 | Dr.13972.1.S1_at                                                         | zgc:64114        | hypothetical protein LOC378866 [Source:RefSeq_peptide;Acc:NP_956401]                                      | -3332 | -3327 | 1      | tcgctg   |
| ENSDARG0000037618 | ENSDART0000054788 | Dr.13972.1.S1_at                                                         | zgc:64114        | hypothetical protein LOC378866 [Source:RefSeq_peptide;Acc:NP_956401]                                      | -4700 | -4695 | -1     | cgcggt   |
| ENSDARG0000037618 | ENSDART0000054788 | Dr.13972.1.S1_at                                                         | zgc:64114        | hypothetical protein LOC378866 [Source:RefSeq_peptide;Acc:NP_956401]                                      | -1223 | -1218 | -1     | tcgctg   |
| ENSDARG0000037618 | ENSDART0000054788 | Dr.13972.1.S1_at                                                         | zgc:64114        | hypothetical protein LOC378866 [Source:RefSeq_peptide;Acc:NP_956401]                                      | -1219 | -1214 | -1     | tcgctg   |
| ENSDARG0000037618 | ENSDART0000054788 | Dr.13972.1.S1_at                                                         | zgc:64114        | hypothetical protein LOC378866 [Source:RefSeq_peptide;Acc:NP_956401]                                      | -1203 | -1198 | -1     | tcgctg   |
| ENSDARG0000037618 | ENSDART0000054788 | Dr.13972.1.S1_at                                                         | zgc:64114        | hypothetical protein LOC378866 [Source:RefSeq_peptide;Acc:NP_956401]                                      | -1199 | -1194 | -1     | tcgctg   |
| ENSDARG0000037618 | ENSDART0000054788 | Dr.13972.1.S1_at                                                         | zgc:64114        | hypothetical protein LOC378866 [Source:RefSeq_peptide;Acc:NP_956401]                                      | -578  | -573  | -1     | tcgctg   |
| ENSDARG0000037618 | ENSDART0000054788 | Dr.13972.1.S1_at                                                         | zgc:64114        | hypothetical protein LOC378866 [Source:RefSeq_peptide;Acc:NP_956401]                                      | -351  | -346  | 1      | ggcggt   |
| ENSDARG0000037618 | ENSDART0000054788 | Dr.13972.1.S1_at                                                         | zgc:64114        | hypothetical protein LOC378866 [Source:RefSeq_peptide;Acc:NP_956401]                                      | -243  | -238  | -1     | cgcggt   |
| ENSDARG0000037618 | ENSDART0000054788 | Dr.13972.1.S1_at                                                         | zgc:64114        | hypothetical protein LOC378866 [Source:RefSeq_peptide;Acc:NP_956401]                                      | -30   | -25   | -1     | tcgctg   |
| ENSDARG0000038321 | ENSDART0000055897 | Dr.9682.1.A1_at                                                          |                  |                                                                                                           | -3855 | -3850 | 1      | tcgctg   |
| ENSDARG0000038321 | ENSDART0000055897 | Dr.9682.1.A1_at                                                          |                  |                                                                                                           | -1979 | -1974 | -1     | ggcggt   |
| ENSDARG0000038321 | ENSDART0000055897 | Dr.9682.1.A1_at                                                          |                  |                                                                                                           | -346  | -341  | -1     | tcgctg   |
| ENSDARG0000038622 | ENSDART0000056382 | Dr.20270.1.S1_at                                                         |                  |                                                                                                           | -4477 | -4472 | 1      | agcgtg   |
| ENSDARG0000038622 | ENSDART0000056382 | Dr.20270.1.S1_at                                                         |                  |                                                                                                           | -1704 | -1699 | 1      | agcgtg   |
| ENSDARG0000038622 | ENSDART0000056382 | Dr.20270.1.S1_at                                                         |                  |                                                                                                           | -4665 | -4660 | 1      | ggcggt   |
| ENSDARG0000038622 | ENSDART0000056382 | Dr.20270.1.S1_at                                                         |                  |                                                                                                           | -1420 | -1415 | 1      | ggcggt   |
| ENSDARG0000038622 | ENSDART0000056382 | Dr.20270.1.S1_at                                                         |                  |                                                                                                           | -1399 | -1394 | -1     | ggcggt   |
| ENSDARG0000038622 | ENSDART0000056382 | Dr.20270.1.S1_at                                                         |                  |                                                                                                           | -1221 | -1216 | 1      | tcgctg   |
| ENSDARG0000038622 | ENSDART0000056382 | Dr.20270.1.S1_at                                                         |                  |                                                                                                           | -1057 | -1052 | -1     | tcgctg   |
| ENSDARG0000038812 | ENSDART0000056679 | Dr.20140.1.A1_at                                                         | NP_991178.1      | E2F transcription factor 4, p107/p130-binding [Source:RefSeq_peptide;Acc:NP_991178]                       | -3847 | -3842 | 1      | ggcggt   |
| ENSDARG0000038813 | ENSDART0000056680 | Dr.20140.1.A1_at                                                         | NP_991178.1      | E2F transcription factor 4, p107/p130-binding [Source:RefSeq_peptide;Acc:NP_991178]                       | -3732 | -3727 | 1      | ggcggt   |
| ENSDARG0000039027 | ENSDART0000056969 | Dr.4797.1.S1_at,Dr.4797.1.S1_at                                          |                  |                                                                                                           | -2978 | -2973 | -1     | agcgtg   |
| ENSDARG0000039027 | ENSDART0000056969 | Dr.4797.1.S1_at,Dr.4797.1.S1_at                                          |                  |                                                                                                           | -862  | -857  | -1     | tcgctg   |
| ENSDARG0000039027 | ENSDART0000056969 | Dr.4797.1.S1_at,Dr.4797.1.S1_at                                          |                  |                                                                                                           | -540  | -535  | 1      | ggcggt   |
| ENSDARG0000039027 | ENSDART0000056969 | Dr.4797.1.S1_at,Dr.4797.1.S1_at                                          |                  |                                                                                                           | -4068 | -4063 | -1     | agcgtg   |
| ENSDARG0000039728 | ENSDART0000037346 | Dr.3581.1.S1_at,Dr.3581.1.S1_a_at                                        | ctrb1            | chymotrypsinogen B1 [Source:RefSeq_peptide;Acc:NP_997783]                                                 | -4839 | -4834 | -1     | ggcggt   |
| ENSDARG0000039747 | ENSDART0000058095 | Dr.4797.1.S1_at                                                          |                  |                                                                                                           | -2916 | -2911 | -1     | ggcggt   |
| ENSDARG0000039747 | ENSDART0000058095 | Dr.4797.1.S1_at                                                          |                  |                                                                                                           | -2797 | -2792 | 1      | agcgtg   |
| ENSDARG0000039747 | ENSDART0000058095 | Dr.4797.1.S1_at                                                          |                  |                                                                                                           | -2399 | -2394 | 1      | agcgtg   |
| ENSDARG0000039747 | ENSDART0000058095 | Dr.4797.1.S1_at                                                          |                  |                                                                                                           | -1967 | -1962 | -1     | tcgctg   |
| ENSDARG0000039841 | ENSDART0000058272 | Dr.7110.1.S1_at                                                          | zgc:77614        | hypothetical protein LOC393868 [Source:RefSeq_peptide;Acc:NP_957188]                                      | -2848 | -2843 | 1      | tcgctg   |
| ENSDARG0000039914 | ENSDART0000058384 | AFFX-Dr-GAPDH-3_at,AFFX-Dr-GAPDH-M_at,Dr.1194.1.S1_at,AFFX-Dr-GAPDH-5_at | zgc:76908        | glyceraldehyde 3-phosphate dehydrogenase [Source:RefSeq_peptide;Acc:NP_998259]                            | -3815 | -3810 | 1      | agcgtg   |
| ENSDARG0000039914 | ENSDART0000058384 | AFFX-Dr-GAPDH-3_at,AFFX-Dr-GAPDH-M_at,Dr.1194.1.S1_at,AFFX-Dr-GAPDH-5_at | zgc:76908        | glyceraldehyde 3-phosphate dehydrogenase [Source:RefSeq_peptide;Acc:NP_998259]                            | -2730 | -2725 | 1      | agcgtg   |
| ENSDARG0000039914 | ENSDART0000058384 | AFFX-Dr-GAPDH-3_at,AFFX-Dr-GAPDH-M_at,Dr.1194.1.S1_at,AFFX-Dr-GAPDH-5_at | zgc:76908        | glyceraldehyde 3-phosphate dehydrogenase [Source:RefSeq_peptide;Acc:NP_998259]                            | -1064 | -1059 | 1      | tcgctg   |
| ENSDARG0000039914 | ENSDART0000058384 | AFFX-Dr-GAPDH-3_at,AFFX-Dr-GAPDH-M_at,Dr.1194.1.S1_at,AFFX-Dr-GAPDH-5_at | zgc:76908        | glyceraldehyde 3-phosphate dehydrogenase [Source:RefSeq_peptide;Acc:NP_998259]                            | -3815 | -3810 | 1      | agcgtg   |
| ENSDARG0000039914 | ENSDART0000058384 | AFFX-Dr-GAPDH-3_at,AFFX-Dr-GAPDH-M_at,Dr.1194.1.S1_at,AFFX-Dr-GAPDH-5_at | zgc:76908        | glyceraldehyde 3-phosphate dehydrogenase [Source:RefSeq_peptide;Acc:NP_998259]                            | -2730 | -2725 | 1      | agcgtg   |
| ENSDARG0000039914 | ENSDART0000058384 | AFFX-Dr-GAPDH-3_at,AFFX-Dr-GAPDH-M_at,Dr.1194.1.S1_at,AFFX-Dr-GAPDH-5_at | zgc:76908        | glyceraldehyde 3-phosphate dehydrogenase [Source:RefSeq_peptide;Acc:NP_998259]                            | -1064 | -1059 | 1      | tcgctg   |
| ENSDARG0000039914 | ENSDART0000058384 | AFFX-Dr-GAPDH-3_at,AFFX-Dr-GAPDH-M_at,Dr.1194.1.S1_at,AFFX-Dr-GAPDH-5_at | zgc:76908        | glyceraldehyde 3-phosphate dehydrogenase [Source:RefSeq_peptide;Acc:NP_998259]                            | -3815 | -3810 | 1      | agcgtg   |
| ENSDARG0000039914 | ENSDART0000058384 | AFFX-Dr-GAPDH-3_at,AFFX-Dr-GAPDH-M_at,Dr.1194.1.S1_at,AFFX-Dr-GAPDH-5_at | zgc:76908        | glyceraldehyde 3-phosphate dehydrogenase [Source:RefSeq_peptide;Acc:NP_998259]                            | -2730 | -2725 | 1      | agcgtg   |
| ENSDARG0000039914 | ENSDART0000058384 | AFFX-Dr-GAPDH-3_at,AFFX-Dr-GAPDH-M_at,Dr.1194.1.S1_at,AFFX-Dr-GAPDH-5_at | zgc:76908        | glyceraldehyde 3-phosphate dehydrogenase [Source:RefSeq_peptide;Acc:NP_998259]                            | -1064 | -1059 | 1      | tcgctg   |
| ENSDARG0000039914 | ENSDART0000058384 | AFFX-Dr-GAPDH-3_at,AFFX-Dr-GAPDH-M_at,Dr.1194.1.S1_at,AFFX-Dr-GAPDH-5_at | zgc:76908        | glyceraldehyde 3-phosphate dehydrogenase [Source:RefSeq_peptide;Acc:NP_998259]                            | -3815 | -3810 | 1      | agcgtg   |
| ENSDARG0000039914 | ENSDART0000058384 | AFFX-Dr-GAPDH-3_at,AFFX-Dr-GAPDH-M_at,Dr.1194.1.S1_at,AFFX-Dr-GAPDH-5_at | zgc:76908        | glyceraldehyde 3-phosphate dehydrogenase [Source:RefSeq_peptide;Acc:NP_998259]                            | -2730 | -2725 | 1      | agcgtg   |



Supplementary Table 2 (cont.). Location of putative AHRES

| Gene ID            | Transcript ID      | Affy IDs                                                                                                                            | Symbol         | Description                                                                      | Start | End   | Strand | Sequence |
|--------------------|--------------------|-------------------------------------------------------------------------------------------------------------------------------------|----------------|----------------------------------------------------------------------------------|-------|-------|--------|----------|
| ENSDARG00000041685 | ENSDART00000061098 | Dr.25379.1.S1_at,Dr.3025.3.S1_at,Dr.16397.1.A1_at,Dr.25379.1.S1_at,Dr.3025.3.S1_at,Dr.16397.1.A1_at,Dr.3025.2.S1_at,Dr.3025.3.S1_at |                |                                                                                  | -2312 | -2307 | -1     | tcgctg   |
| ENSDARG00000041685 | ENSDART00000061098 | Dr.25379.1.S1_at,Dr.3025.3.S1_at,Dr.16397.1.A1_at,Dr.25379.1.S1_at,Dr.3025.3.S1_at,Dr.16397.1.A1_at,Dr.3025.2.S1_at,Dr.3025.3.S1_at |                |                                                                                  | -2072 | -2067 | -1     | agcgtg   |
| ENSDARG00000041685 | ENSDART00000061098 | Dr.25379.1.S1_at,Dr.3025.3.S1_at,Dr.16397.1.A1_at,Dr.25379.1.S1_at,Dr.3025.3.S1_at,Dr.16397.1.A1_at,Dr.3025.2.S1_at,Dr.3025.3.S1_at |                |                                                                                  | -4585 | -4580 | 1      | agcgtg   |
| ENSDARG00000041685 | ENSDART0000006984  | Dr.25379.1.S1_at,Dr.3025.3.S1_at,Dr.16397.1.A1_at,Dr.25379.1.S1_at,Dr.3025.3.S1_at,Dr.16397.1.A1_at,Dr.3025.2.S1_at,Dr.3025.3.S1_at |                |                                                                                  | -3122 | -3117 | -1     | tcgctg   |
| ENSDARG00000041685 | ENSDART0000006984  | Dr.25379.1.S1_at,Dr.3025.3.S1_at,Dr.16397.1.A1_at,Dr.25379.1.S1_at,Dr.3025.3.S1_at,Dr.16397.1.A1_at,Dr.3025.2.S1_at,Dr.3025.3.S1_at |                |                                                                                  | -2882 | -2877 | -1     | agcgtg   |
| ENSDARG00000041685 | ENSDART0000006984  | Dr.25379.1.S1_at,Dr.3025.3.S1_at,Dr.16397.1.A1_at,Dr.25379.1.S1_at,Dr.3025.3.S1_at,Dr.16397.1.A1_at,Dr.3025.2.S1_at,Dr.3025.3.S1_at |                |                                                                                  | -629  | -624  | -1     | ggcgtg   |
| ENSDARG00000041685 | ENSDART00000061093 | Dr.25379.1.S1_at,Dr.3025.3.S1_at,Dr.16397.1.A1_at,Dr.25379.1.S1_at,Dr.3025.3.S1_at,Dr.16397.1.A1_at,Dr.3025.2.S1_at,Dr.3025.3.S1_at |                |                                                                                  | -3476 | -3471 | 1      | ggcgtg   |
| ENSDARG00000041685 | ENSDART00000061093 | Dr.25379.1.S1_at,Dr.3025.3.S1_at,Dr.16397.1.A1_at,Dr.25379.1.S1_at,Dr.3025.3.S1_at,Dr.16397.1.A1_at,Dr.3025.2.S1_at,Dr.3025.3.S1_at |                |                                                                                  | -3106 | -3101 | -1     | tcgctg   |
| ENSDARG00000041685 | ENSDART00000061093 | Dr.25379.1.S1_at,Dr.3025.3.S1_at,Dr.16397.1.A1_at,Dr.25379.1.S1_at,Dr.3025.3.S1_at,Dr.16397.1.A1_at,Dr.3025.2.S1_at,Dr.3025.3.S1_at |                |                                                                                  | -2371 | -2366 | -1     | ggcgtg   |
| ENSDARG00000041685 | ENSDART00000061098 | Dr.25379.1.S1_at,Dr.3025.3.S1_at,Dr.16397.1.A1_at,Dr.25379.1.S1_at,Dr.3025.3.S1_at,Dr.16397.1.A1_at,Dr.3025.2.S1_at,Dr.3025.3.S1_at |                |                                                                                  | -2312 | -2307 | -1     | tcgctg   |
| ENSDARG00000041685 | ENSDART00000061098 | Dr.25379.1.S1_at,Dr.3025.3.S1_at,Dr.16397.1.A1_at,Dr.25379.1.S1_at,Dr.3025.3.S1_at,Dr.16397.1.A1_at,Dr.3025.2.S1_at,Dr.3025.3.S1_at |                |                                                                                  | -2072 | -2067 | -1     | agcgtg   |
| ENSDARG00000041685 | ENSDART00000061098 | Dr.25379.1.S1_at,Dr.3025.3.S1_at,Dr.16397.1.A1_at,Dr.25379.1.S1_at,Dr.3025.3.S1_at,Dr.16397.1.A1_at,Dr.3025.2.S1_at,Dr.3025.3.S1_at |                |                                                                                  | -4585 | -4580 | 1      | agcgtg   |
| ENSDARG00000041769 | ENSDART00000061219 | Dr.7806.1.A1_at                                                                                                                     | NP_001014360.1 | hypothetical protein LOC541525 [Source:RefSeq_peptide;Acc:NP_001014360]          | -1147 | -1142 | 1      | agcgtg   |
| ENSDARG00000041769 | ENSDART00000061219 | Dr.7806.1.A1_at                                                                                                                     | NP_001014360.1 | hypothetical protein LOC541525 [Source:RefSeq_peptide;Acc:NP_001014360]          | -593  | -588  | 1      | tcgctg   |
| ENSDARG00000041769 | ENSDART00000061219 | Dr.7806.1.A1_at                                                                                                                     | NP_001014360.1 | hypothetical protein LOC541525 [Source:RefSeq_peptide;Acc:NP_001014360]          | -11   | -6    | 1      | cgctgt   |
| ENSDARG00000041774 | ENSDART00000061223 | Dr.25009.6.A1_a_at                                                                                                                  |                |                                                                                  | -3462 | -3457 | 1      | tcgctg   |
| ENSDARG00000041774 | ENSDART00000061223 | Dr.25009.6.A1_a_at                                                                                                                  |                |                                                                                  | -3163 | -3158 | -1     | tcgctg   |
| ENSDARG00000041774 | ENSDART00000061223 | Dr.25009.6.A1_a_at                                                                                                                  |                |                                                                                  | -2354 | -2349 | 1      | tcgctg   |
| ENSDARG00000041813 | ENSDART00000061279 | Dr.7806.1.A1_at                                                                                                                     | NP_001014360.1 | hypothetical protein LOC541525 [Source:RefSeq_peptide;Acc:NP_001014360]          | -1147 | -1142 | 1      | agcgtg   |
| ENSDARG00000041813 | ENSDART00000061279 | Dr.7806.1.A1_at                                                                                                                     | NP_001014360.1 | hypothetical protein LOC541525 [Source:RefSeq_peptide;Acc:NP_001014360]          | -593  | -588  | 1      | tcgctg   |
| ENSDARG00000041813 | ENSDART00000061279 | Dr.7806.1.A1_at                                                                                                                     | NP_001014360.1 | hypothetical protein LOC541525 [Source:RefSeq_peptide;Acc:NP_001014360]          | -11   | -6    | 1      | cgctgt   |
| ENSDARG00000041997 | ENSDART00000061544 | Dr.12106.1.S1_at                                                                                                                    | NP_955881.1    | leucine zipper transcription factor-like 1 [Source:RefSeq_peptide;Acc:NP_955881] | -3994 | -3989 | -1     | tcgctg   |
| ENSDARG00000041997 | ENSDART00000061544 | Dr.12106.1.S1_at                                                                                                                    | NP_955881.1    | leucine zipper transcription factor-like 1 [Source:RefSeq_peptide;Acc:NP_955881] | -3121 | -3116 | -1     | tcgctg   |
| ENSDARG00000041997 | ENSDART00000061544 | Dr.12106.1.S1_at                                                                                                                    | NP_955881.1    | leucine zipper transcription factor-like 1 [Source:RefSeq_peptide;Acc:NP_955881] | -3028 | -3023 | -1     | tcgctg   |
| ENSDARG00000041997 | ENSDART00000061544 | Dr.12106.1.S1_at                                                                                                                    | NP_955881.1    | leucine zipper transcription factor-like 1 [Source:RefSeq_peptide;Acc:NP_955881] | -2933 | -2928 | -1     | tcgctg   |
| ENSDARG00000041997 | ENSDART00000061544 | Dr.12106.1.S1_at                                                                                                                    | NP_955881.1    | leucine zipper transcription factor-like 1 [Source:RefSeq_peptide;Acc:NP_955881] | -2886 | -2881 | -1     | ggcgtg   |
| ENSDARG00000041997 | ENSDART00000061544 | Dr.12106.1.S1_at                                                                                                                    | NP_955881.1    | leucine zipper transcription factor-like 1 [Source:RefSeq_peptide;Acc:NP_955881] | -2842 | -2837 | -1     | tcgctg   |
| ENSDARG00000041997 | ENSDART00000061544 | Dr.12106.1.S1_at                                                                                                                    | NP_955881.1    | leucine zipper transcription factor-like 1 [Source:RefSeq_peptide;Acc:NP_955881] | -2749 | -2744 | -1     | tcgctg   |
| ENSDARG00000041997 | ENSDART00000061544 | Dr.12106.1.S1_at                                                                                                                    | NP_955881.1    | leucine zipper transcription factor-like 1 [Source:RefSeq_peptide;Acc:NP_955881] | -1985 | -1980 | 1      | ggcgtg   |
| ENSDARG00000041997 | ENSDART00000061544 | Dr.12106.1.S1_at                                                                                                                    | NP_955881.1    | leucine zipper transcription factor-like 1 [Source:RefSeq_peptide;Acc:NP_955881] | -1912 | -1907 | -1     | cgctgt   |
| ENSDARG00000041997 | ENSDART00000061544 | Dr.12106.1.S1_at                                                                                                                    | NP_955881.1    | leucine zipper transcription factor-like 1 [Source:RefSeq_peptide;Acc:NP_955881] | -1723 | -1718 | 1      | agcgtg   |
| ENSDARG00000041997 | ENSDART00000061544 | Dr.12106.1.S1_at                                                                                                                    | NP_955881.1    | leucine zipper transcription factor-like 1 [Source:RefSeq_peptide;Acc:NP_955881] | -1616 | -1611 | 1      | cgctgt   |
| ENSDARG00000041997 | ENSDART00000061544 | Dr.12106.1.S1_at                                                                                                                    | NP_955881.1    | leucine zipper transcription factor-like 1 [Source:RefSeq_peptide;Acc:NP_955881] | -1309 | -1304 | -1     | agcgtg   |
| ENSDARG00000041997 | ENSDART00000061544 | Dr.12106.1.S1_at                                                                                                                    | NP_955881.1    | leucine zipper transcription factor-like 1 [Source:RefSeq_peptide;Acc:NP_955881] | -1225 | -1220 | 1      | agcgtg   |
| ENSDARG00000041997 | ENSDART00000061544 | Dr.12106.1.S1_at                                                                                                                    | NP_955881.1    | leucine zipper transcription factor-like 1 [Source:RefSeq_peptide;Acc:NP_955881] | -1129 | -1124 | -1     | agcgtg   |
| ENSDARG00000041997 | ENSDART00000061544 | Dr.12106.1.S1_at                                                                                                                    | NP_955881.1    | leucine zipper transcription factor-like 1 [Source:RefSeq_peptide;Acc:NP_955881] | -204  | -199  | 1      | ggcgtg   |
| ENSDARG00000041997 | ENSDART00000061544 | Dr.12106.1.S1_at                                                                                                                    | NP_955881.1    | leucine zipper transcription factor-like 1 [Source:RefSeq_peptide;Acc:NP_955881] | -4007 | -4002 | -1     | cgctgt   |
| ENSDARG00000041997 | ENSDART00000061544 | Dr.12106.1.S1_at                                                                                                                    | NP_955881.1    | leucine zipper transcription factor-like 1 [Source:RefSeq_peptide;Acc:NP_955881] | -4005 | -4000 | 1      | cgctgt   |
| ENSDARG00000042035 | ENSDART00000061601 | Dr.7110.1.S1_at                                                                                                                     | zgc:77614      | hypothetical protein LOC393868 [Source:RefSeq_peptide;Acc:NP_957188]             | -2073 | -2068 | 1      | tcgctg   |
| ENSDARG00000042035 | ENSDART00000061601 | Dr.7110.1.S1_at                                                                                                                     | zgc:77614      | hypothetical protein LOC393868 [Source:RefSeq_peptide;Acc:NP_957188]             | -1107 | -1102 | 1      | agcgtg   |
| ENSDARG00000042036 | ENSDART00000061605 | Dr.7110.1.S1_at                                                                                                                     | zgc:77614      | hypothetical protein LOC393868 [Source:RefSeq_peptide;Acc:NP_957188]             | -3478 | -3473 | 1      | cgctgt   |
| ENSDARG00000042036 | ENSDART00000061605 | Dr.7110.1.S1_at                                                                                                                     | zgc:77614      | hypothetical protein LOC393868 [Source:RefSeq_peptide;Acc:NP_957188]             | -2685 | -2680 | -1     | agcgtg   |
| ENSDARG00000042036 | ENSDART00000061605 | Dr.7110.1.S1_at                                                                                                                     | zgc:77614      | hypothetical protein LOC393868 [Source:RefSeq_peptide;Acc:NP_957188]             | -1952 | -1947 | -1     | agcgtg   |
| ENSDARG00000042036 | ENSDART00000061605 | Dr.7110.1.S1_at                                                                                                                     | zgc:77614      | hypothetical protein LOC393868 [Source:RefSeq_peptide;Acc:NP_957188]             | -4240 | -4235 | -1     | cgctgt   |
| ENSDARG00000042036 | ENSDART00000061605 | Dr.7110.1.S1_at                                                                                                                     | zgc:77614      | hypothetical protein LOC393868 [Source:RefSeq_peptide;Acc:NP_957188]             | -4141 | -4136 | 1      | ggcgtg   |
| ENSDARG00000042036 | ENSDART00000061605 | Dr.7110.1.S1_at                                                                                                                     | zgc:77614      | hypothetical protein LOC393868 [Source:RefSeq_peptide;Acc:NP_957188]             | -4030 | -4025 | -1     | tcgctg   |
| ENSDARG00000042040 | ENSDART00000061613 | Dr.7110.1.S1_at                                                                                                                     |                |                                                                                  | -3458 | -3453 | 1      | cgctgt   |
| ENSDARG00000042040 | ENSDART00000061613 | Dr.7110.1.S1_at                                                                                                                     |                |                                                                                  | -3452 | -3447 | -1     | cgctgt   |
| ENSDARG00000042040 | ENSDART00000061613 | Dr.7110.1.S1_at                                                                                                                     |                |                                                                                  | -3296 | -3291 | -1     | agcgtg   |
| ENSDARG00000042040 | ENSDART00000061613 | Dr.7110.1.S1_at                                                                                                                     |                |                                                                                  | -3099 | -3094 | 1      | tcgctg   |
| ENSDARG00000042040 | ENSDART00000061613 | Dr.7110.1.S1_at                                                                                                                     |                |                                                                                  | -4806 | -4801 | -1     | agcgtg   |
| ENSDARG00000042040 | ENSDART00000061613 | Dr.7110.1.S1_at                                                                                                                     |                |                                                                                  | -2894 | -2889 | -1     | agcgtg   |
| ENSDARG00000042040 | ENSDART00000061613 | Dr.7110.1.S1_at                                                                                                                     |                |                                                                                  | -2740 | -2735 | -1     | agcgtg   |
| ENSDARG00000042040 | ENSDART00000061613 | Dr.7110.1.S1_at                                                                                                                     |                |                                                                                  | -1791 | -1786 | 1      | tcgctg   |
| ENSDARG00000042046 | ENSDART00000061618 | Dr.7110.1.S1_at                                                                                                                     | zgc:77614      | hypothetical protein LOC393868 [Source:RefSeq_peptide;Acc:NP_957188]             | -1760 | -1755 | 1      | tcgctg   |
| ENSDARG00000042050 | ENSDART00000061623 | Dr.7110.1.S1_at                                                                                                                     | zgc:77614      | hypothetical protein LOC393868 [Source:RefSeq_peptide;Acc:NP_957188]             | -3571 | -3566 | -1     | ggcgtg   |
| ENSDARG00000042050 | ENSDART00000061623 | Dr.7110.1.S1_at                                                                                                                     | zgc:77614      | hypothetical protein LOC393868 [Source:RefSeq_peptide;Acc:NP_957188]             | -1913 | -1908 | -1     | agcgtg   |
| ENSDARG00000042102 | ENSDART00000061707 | Dr.13689.1.S1_at                                                                                                                    | zgc:63985      | Unknown (protein for MGC:66449) [Source:RefSeq_peptide;Acc:NP_956095]            | -2802 | -2797 | -1     | cgctgt   |
| ENSDARG00000042391 | ENSDART00000062156 | Dr.14748.1.S1_at                                                                                                                    | zgc:63985      | zgc:63985 (zgc:63985), mRNA [Source:RefSeq_dna;Acc:NM_199958]                    | -1900 | -1895 | -1     | tcgctg   |
| ENSDARG00000042391 | ENSDART00000062156 | Dr.14748.1.S1_at                                                                                                                    | zgc:63985      | zgc:63985 (zgc:63985), mRNA [Source:RefSeq_dna;Acc:NM_199958]                    | -1043 | -1038 | 1      | agcgtg   |
| ENSDARG00000043218 | ENSDART00000063453 | Dr.15054.1.S1_at                                                                                                                    | rbp2a          | retinol binding protein 2a, cellular [Source:RefSeq_peptide;Acc:NP_694549]       | -2638 | -2633 | 1      | ggcgtg   |
| ENSDARG00000043218 | ENSDART00000063453 | Dr.15054.1.S1_at                                                                                                                    | rbp2a          | retinol binding protein 2a, cellular [Source:RefSeq_peptide;Acc:NP_694549]       | -2352 | -2347 | 1      | cgctgt   |
| ENSDARG00000043218 | ENSDART00000063453 | Dr.15054.1.S1_at                                                                                                                    | rbp2a          | retinol binding protein 2a, cellular [Source:RefSeq_peptide;Acc:NP_694549]       | -1487 | -1482 | 1      | tcgctg   |
| ENSDARG00000043218 | ENSDART00000063453 | Dr.15054.1.S1_at                                                                                                                    | rbp2a          | retinol binding protein 2a, cellular [Source:RefSeq_peptide;Acc:NP_694549]       | -4225 | -4220 | 1      | agcgtg   |
| ENSDARG00000043320 | ENSDART00000063596 | Dr.14268.1.A1_at,Dr.18893.1.S1_at                                                                                                   |                |                                                                                  | -4981 | -4976 | 1      | tcgctg   |
| ENSDARG00000043320 | ENSDART00000063596 | Dr.14268.1.A1_at,Dr.18893.1.S1_at                                                                                                   |                |                                                                                  | -557  | -552  | 1      | ggcgtg   |
| ENSDARG00000043320 | ENSDART00000063596 | Dr.14268.1.A1_at,Dr.18893.1.S1_at                                                                                                   |                |                                                                                  | -251  | -246  | 1      | agcgtg   |
| ENSDARG00000043592 | ENSDART00000064008 | Dr.17113.1.A1_a_at,Dr.3889.1.A1_at,Dr.17113.1.A1_a_at,Dr.3889.1.A1_at                                                               | ptena          | phosphatase and tensin-like protein A [Source:RefSeq_peptide;Acc:NP_957002]      | -734  | -729  | -1     | cgctgt   |
| ENSDARG00000043592 | ENSDART00000064008 | Dr.17113.1.A1_a_at,Dr.3889.1.A1_at,Dr.17113.1.A1_a_at,Dr.3889.1.A1_at                                                               | ptena          | phosphatase and tensin-like protein A [Source:RefSeq_peptide;Acc:NP_957002]      | -561  | -556  | -1     | agcgtg   |
| ENSDARG00000043592 | ENSDART00000064008 | Dr.17113.1.A1_a_at,Dr.3889.1.A1_at,Dr.17113.1.A1_a_at,Dr.3889.1.A1_at                                                               | ptena          | phosphatase and tensin-like protein A [Source:RefSeq_peptide;Acc:NP_957002]      | -527  | -522  | -1     | tcgctg   |
| ENSDARG00000043592 | ENSDART00000064010 | Dr.17113.1.A1_a_at,Dr.3889.1.A1_at,Dr.17113.1.A1_a_at,Dr.3889.1.A1_at                                                               | ptena          | phosphatase and tensin-like protein A [Source:RefSeq_peptide;Acc:NP_957002]      | -533  | -528  | -1     | cgctgt   |
| ENSDARG00000043592 | ENSDART00000064010 | Dr.17113.1.A1_a_at,Dr.3889.1.A1_at,Dr.17113.1.A1_a_at,Dr.3889.1.A1_at                                                               | ptena          | phosphatase and tensin-like protein A [Source:RefSeq_peptide;Acc:NP_957002]      | -360  | -355  | -1     | agcgtg   |
| ENSDARG00000043592 | ENSDART00000064010 | Dr.17113.1.A1_a_at,Dr.3889.1.A1_at,Dr.17113.1.A1_a_at,Dr.3889.1.A1_at                                                               | ptena          | phosphatase and tensin-like protein A [Source:RefSeq_peptide;Acc:NP_957002]      | -326  | -321  | -1     | tcgctg   |
| ENSDARG00000043618 | ENSDART00000064041 | Dr.7236.1.A1_at,Dr.7236.1.A1_at                                                                                                     |                |                                                                                  | -2734 | -2729 | -1     | cgctgt   |



Supplementary Table 2 (cont.). Location of putative AHREs

| Gene ID            | Transcript ID      | Affy IDs                                                                                  | Symbol         | Description                                                                                                                                            | Start | End   | Strand | Sequence |
|--------------------|--------------------|-------------------------------------------------------------------------------------------|----------------|--------------------------------------------------------------------------------------------------------------------------------------------------------|-------|-------|--------|----------|
| ENSDARG00000043618 | ENSDART00000064041 | Dr.7236.1.A1_at,Dr.7236.1.A1_at                                                           |                |                                                                                                                                                        | -2732 | -2727 | 1      | cgcggtg  |
| ENSDARG00000043618 | ENSDART00000064044 | Dr.7236.1.A1_at,Dr.7236.1.A1_at                                                           |                |                                                                                                                                                        | -2734 | -2729 | -1     | cgcggtg  |
| ENSDARG00000043618 | ENSDART00000064044 | Dr.7236.1.A1_at,Dr.7236.1.A1_at                                                           |                |                                                                                                                                                        | -2732 | -2727 | 1      | cgcggtg  |
| ENSDARG00000043670 | ENSDART00000024462 | Dr.1605.1.S1_at                                                                           | NM_001013259.1 | serine (or cysteine) proteinase inhibitor, clade A (alpha-1 antipeptidase, antitrypsin), member 1 (serpin1), mRNA [Source:RefSeq_dna;Acc:NM_001013259] | -4819 | -4814 | 1      | agcggtg  |
| ENSDARG00000043670 | ENSDART00000024462 | Dr.1605.1.S1_at                                                                           | NM_001013259.1 | serine (or cysteine) proteinase inhibitor, clade A (alpha-1 antipeptidase, antitrypsin), member 1 (serpin1), mRNA [Source:RefSeq_dna;Acc:NM_001013259] | -4143 | -4138 | 1      | agcggtg  |
| ENSDARG00000043692 | ENSDART00000064157 | Dr.19877.1.S1_at                                                                          | zgc:66133      | hypothetical protein LOC393468 [Source:RefSeq_peptide;Acc:NP_956790]                                                                                   | -3071 | -3066 | -1     | tcgctgt  |
| ENSDARG00000043692 | ENSDART00000064157 | Dr.19877.1.S1_at                                                                          | zgc:66133      | hypothetical protein LOC393468 [Source:RefSeq_peptide;Acc:NP_956790]                                                                                   | -2789 | -2784 | 1      | cgcggtg  |
| ENSDARG00000043692 | ENSDART00000064157 | Dr.19877.1.S1_at                                                                          | zgc:66133      | hypothetical protein LOC393468 [Source:RefSeq_peptide;Acc:NP_956790]                                                                                   | -2454 | -2449 | -1     | ggcggtg  |
| ENSDARG00000043692 | ENSDART00000064157 | Dr.19877.1.S1_at                                                                          | zgc:66133      | hypothetical protein LOC393468 [Source:RefSeq_peptide;Acc:NP_956790]                                                                                   | -1360 | -1355 | 1      | ggcggtg  |
| ENSDARG00000043692 | ENSDART00000064157 | Dr.19877.1.S1_at                                                                          | zgc:66133      | hypothetical protein LOC393468 [Source:RefSeq_peptide;Acc:NP_956790]                                                                                   | -942  | -937  | -1     | cgcggtg  |
| ENSDARG00000043692 | ENSDART00000064157 | Dr.19877.1.S1_at                                                                          | zgc:66133      | hypothetical protein LOC393468 [Source:RefSeq_peptide;Acc:NP_956790]                                                                                   | -105  | -100  | -1     | cgcggtg  |
| ENSDARG00000043692 | ENSDART00000064157 | Dr.19877.1.S1_at                                                                          | zgc:66133      | hypothetical protein LOC393468 [Source:RefSeq_peptide;Acc:NP_956790]                                                                                   | -16   | -11   | -1     | cgcggtg  |
| ENSDARG00000043960 | ENSDART00000064542 | Dr.6147.1.A1_at                                                                           | zgc:77150      | hypothetical protein LOC406587 [Source:RefSeq_peptide;Acc:NP_999913]                                                                                   | -3939 | -3934 | -1     | agcggtg  |
| ENSDARG00000043960 | ENSDART00000064542 | Dr.6147.1.A1_at                                                                           | zgc:77150      | hypothetical protein LOC406587 [Source:RefSeq_peptide;Acc:NP_999913]                                                                                   | -4689 | -4684 | 1      | cgcggtg  |
| ENSDARG00000043960 | ENSDART00000064542 | Dr.6147.1.A1_at                                                                           | zgc:77150      | hypothetical protein LOC406587 [Source:RefSeq_peptide;Acc:NP_999913]                                                                                   | -552  | -547  | 1      | tcgctgt  |
| ENSDARG00000043960 | ENSDART00000064542 | Dr.6147.1.A1_at                                                                           | zgc:77150      | hypothetical protein LOC406587 [Source:RefSeq_peptide;Acc:NP_999913]                                                                                   | -4539 | -4534 | 1      | tcgctgt  |
| ENSDARG00000043990 | ENSDART00000064579 | Dr.7806.1.A1_at                                                                           | zgc:77150      | hypothetical protein LOC406587 [Source:RefSeq_peptide;Acc:NP_999913]                                                                                   | -138  | -133  | 1      | tcgctgt  |
| ENSDARG00000043997 | ENSDART00000064586 | Dr.11609.1.S1_at                                                                          | Q7SZD0_BRARE   | LOC402847 protein (Fragment) [Source:UniProt/SPTREMBL;Acc:Q7SZD0]                                                                                      | -2929 | -2924 | -1     | agcggtg  |
| ENSDARG00000043997 | ENSDART00000064586 | Dr.11609.1.S1_at                                                                          | Q7SZD0_BRARE   | LOC402847 protein (Fragment) [Source:UniProt/SPTREMBL;Acc:Q7SZD0]                                                                                      | -600  | -595  | -1     | tcgctgt  |
| ENSDARG00000043997 | ENSDART00000064586 | Dr.11609.1.S1_at                                                                          | Q7SZD0_BRARE   | LOC402847 protein (Fragment) [Source:UniProt/SPTREMBL;Acc:Q7SZD0]                                                                                      | -552  | -547  | -1     | tcgctgt  |
| ENSDARG00000043997 | ENSDART00000064586 | Dr.11609.1.S1_at                                                                          | Q7SZD0_BRARE   | LOC402847 protein (Fragment) [Source:UniProt/SPTREMBL;Acc:Q7SZD0]                                                                                      | -67   | -62   | 1      | ggcggtg  |
| ENSDARG00000044001 | ENSDART00000064597 | Dr.20815.3.A1_at                                                                          | NP_999858.1    | chimera galectin Gal3 [Source:RefSeq_peptide;Acc:NP_999858]                                                                                            | -3720 | -3715 | -1     | tcgctgt  |
| ENSDARG00000044001 | ENSDART00000064597 | Dr.20815.3.A1_at                                                                          | NP_999858.1    | chimera galectin Gal3 [Source:RefSeq_peptide;Acc:NP_999858]                                                                                            | -371  | -366  | -1     | tcgctgt  |
| ENSDARG00000044002 | ENSDART00000064591 | Dr.11609.1.S1_at,Dr.11609.1.S1_at                                                         | NP_001002187.1 | hypothetical protein LOC431734 [Source:RefSeq_peptide;Acc:NP_001002187]                                                                                | -3995 | -3990 | -1     | tcgctgt  |
| ENSDARG00000044002 | ENSDART00000064591 | Dr.11609.1.S1_at,Dr.11609.1.S1_at                                                         | NP_001002187.1 | hypothetical protein LOC431734 [Source:RefSeq_peptide;Acc:NP_001002187]                                                                                | -4812 | -4807 | -1     | agcggtg  |
| ENSDARG00000044002 | ENSDART00000064591 | Dr.11609.1.S1_at,Dr.11609.1.S1_at                                                         | NP_001002187.1 | hypothetical protein LOC431734 [Source:RefSeq_peptide;Acc:NP_001002187]                                                                                | -4972 | -4967 | -1     | tcgctgt  |
| ENSDARG00000044002 | ENSDART00000064591 | Dr.11609.1.S1_at,Dr.11609.1.S1_at                                                         | NP_001002187.1 | hypothetical protein LOC431734 [Source:RefSeq_peptide;Acc:NP_001002187]                                                                                | -1517 | -1512 | 1      | tcgctgt  |
| ENSDARG00000044002 | ENSDART00000064596 | Dr.11609.1.S1_at,Dr.11609.1.S1_at                                                         | NP_001002187.1 | hypothetical protein LOC431734 [Source:RefSeq_peptide;Acc:NP_001002187]                                                                                | -439  | -434  | -1     | tcgctgt  |
| ENSDARG00000044002 | ENSDART00000064596 | Dr.11609.1.S1_at,Dr.11609.1.S1_at                                                         | NP_001002187.1 | hypothetical protein LOC431734 [Source:RefSeq_peptide;Acc:NP_001002187]                                                                                | -1653 | -1648 | -1     | ggcggtg  |
| ENSDARG00000044002 | ENSDART00000064596 | Dr.11609.1.S1_at,Dr.11609.1.S1_at                                                         | NP_001002187.1 | hypothetical protein LOC431734 [Source:RefSeq_peptide;Acc:NP_001002187]                                                                                | -1300 | -1295 | -1     | tcgctgt  |
| ENSDARG00000044002 | ENSDART00000064596 | Dr.11609.1.S1_at,Dr.11609.1.S1_at                                                         | NP_001002187.1 | hypothetical protein LOC431734 [Source:RefSeq_peptide;Acc:NP_001002187]                                                                                | -1140 | -1135 | -1     | agcggtg  |
| ENSDARG00000044002 | ENSDART00000064596 | Dr.11609.1.S1_at,Dr.11609.1.S1_at                                                         | NP_001002187.1 | hypothetical protein LOC431734 [Source:RefSeq_peptide;Acc:NP_001002187]                                                                                | -323  | -318  | -1     | tcgctgt  |
| ENSDARG00000044101 | ENSDART00000064753 | Dr.18135.1.A1_at                                                                          | zgc:92568      | zgc:92568 [Source:RefSeq_peptide;Acc:NP_001005937]                                                                                                     | -4881 | -4876 | 1      | ggcggtg  |
| ENSDARG00000044101 | ENSDART00000064753 | Dr.18135.1.A1_at                                                                          | zgc:92568      | zgc:92568 [Source:RefSeq_peptide;Acc:NP_001005937]                                                                                                     | -475  | -470  | 1      | agcggtg  |
| ENSDARG00000044125 | ENSDART00000064789 | Dr.8723.1.S1_at                                                                           | zgc:92903      | zgc:92903 [Source:RefSeq_peptide;Acc:NP_001002461]                                                                                                     | -1108 | -1103 | -1     | agcggtg  |
| ENSDARG00000044125 | ENSDART00000064789 | Dr.8723.1.S1_at                                                                           | zgc:92903      | zgc:92903 [Source:RefSeq_peptide;Acc:NP_001002461]                                                                                                     | -48   | -43   | 1      | tcgctgt  |
| ENSDARG00000044176 | ENSDART00000064858 | Dr.23470.1.S1_s_at,Dr.8198.1.A1_at                                                        | kmlm2.2        | Kreisler (mouse) maf-related leucine zipper homolog 2.2 [Source:RefSeq_peptide;Acc:NP_571917]                                                          | -3256 | -3251 | -1     | agcggtg  |
| ENSDARG00000044176 | ENSDART00000064858 | Dr.23470.1.S1_s_at,Dr.8198.1.A1_at                                                        | kmlm2.2        | Kreisler (mouse) maf-related leucine zipper homolog 2.2 [Source:RefSeq_peptide;Acc:NP_571917]                                                          | -1753 | -1748 | -1     | tcgctgt  |
| ENSDARG00000044176 | ENSDART00000064858 | Dr.23470.1.S1_s_at,Dr.8198.1.A1_at                                                        | kmlm2.2        | Kreisler (mouse) maf-related leucine zipper homolog 2.2 [Source:RefSeq_peptide;Acc:NP_571917]                                                          | -76   | -71   | -1     | ggcggtg  |
| ENSDARG00000044176 | ENSDART00000064858 | Dr.23470.1.S1_s_at,Dr.8198.1.A1_at                                                        | kmlm2.2        | Kreisler (mouse) maf-related leucine zipper homolog 2.2 [Source:RefSeq_peptide;Acc:NP_571917]                                                          | -43   | -38   | 1      | agcggtg  |
| ENSDARG00000044176 | ENSDART00000064858 | Dr.23470.1.S1_s_at,Dr.8198.1.A1_at                                                        | kmlm2.2        | Kreisler (mouse) maf-related leucine zipper homolog 2.2 [Source:RefSeq_peptide;Acc:NP_571917]                                                          | -3256 | -3251 | -1     | agcggtg  |
| ENSDARG00000044176 | ENSDART00000064858 | Dr.23470.1.S1_s_at,Dr.8198.1.A1_at                                                        | kmlm2.2        | Kreisler (mouse) maf-related leucine zipper homolog 2.2 [Source:RefSeq_peptide;Acc:NP_571917]                                                          | -1753 | -1748 | -1     | tcgctgt  |
| ENSDARG00000044176 | ENSDART00000064858 | Dr.23470.1.S1_s_at,Dr.8198.1.A1_at                                                        | kmlm2.2        | Kreisler (mouse) maf-related leucine zipper homolog 2.2 [Source:RefSeq_peptide;Acc:NP_571917]                                                          | -76   | -71   | -1     | ggcggtg  |
| ENSDARG00000044176 | ENSDART00000064858 | Dr.23470.1.S1_s_at,Dr.8198.1.A1_at                                                        | kmlm2.2        | Kreisler (mouse) maf-related leucine zipper homolog 2.2 [Source:RefSeq_peptide;Acc:NP_571917]                                                          | -43   | -38   | 1      | agcggtg  |
| ENSDARG00000044613 | ENSDART00000014927 | Dr.14041.1.S1_at                                                                          | NP_001005976.1 | hypothetical protein LOC449803 [Source:RefSeq_peptide;Acc:NP_001005976]                                                                                | -3600 | -3595 | 1      | ggcggtg  |
| ENSDARG00000044613 | ENSDART00000014927 | Dr.14041.1.S1_at                                                                          | NP_001005976.1 | hypothetical protein LOC449803 [Source:RefSeq_peptide;Acc:NP_001005976]                                                                                | -3377 | -3372 | 1      | cgcggtg  |
| ENSDARG00000044613 | ENSDART00000014927 | Dr.14041.1.S1_at                                                                          | NP_001005976.1 | hypothetical protein LOC449803 [Source:RefSeq_peptide;Acc:NP_001005976]                                                                                | -58   | -53   | -1     | tcgctgt  |
| ENSDARG00000044613 | ENSDART00000014927 | Dr.14041.1.S1_at                                                                          | NP_001005976.1 | hypothetical protein LOC449803 [Source:RefSeq_peptide;Acc:NP_001005976]                                                                                | -39   | -34   | 1      | agcggtg  |
| ENSDARG00000044625 | ENSDART00000065562 | Dr.14268.1.A1_at,Dr.18893.1.S1_at                                                         | zgc:92226      | hypothetical protein LOC492341 [Source:RefSeq_peptide;Acc:NP_001007308]                                                                                | -4982 | -4977 | 1      | tcgctgt  |
| ENSDARG00000044625 | ENSDART00000065562 | Dr.14268.1.A1_at,Dr.18893.1.S1_at                                                         | zgc:92226      | hypothetical protein LOC492341 [Source:RefSeq_peptide;Acc:NP_001007308]                                                                                | -251  | -246  | 1      | agcggtg  |
| ENSDARG00000044936 | ENSDART00000066051 | Dr.7110.1.S1_at                                                                           | zgc:77614      | hypothetical protein LOC393868 [Source:RefSeq_peptide;Acc:NP_957188]                                                                                   | -3792 | -3787 | 1      | tcgctgt  |
| ENSDARG00000044936 | ENSDART00000066051 | Dr.7110.1.S1_at                                                                           | zgc:77614      | hypothetical protein LOC393868 [Source:RefSeq_peptide;Acc:NP_957188]                                                                                   | -3267 | -3262 | 1      | cgcggtg  |
| ENSDARG00000044936 | ENSDART00000066051 | Dr.7110.1.S1_at                                                                           | zgc:77614      | hypothetical protein LOC393868 [Source:RefSeq_peptide;Acc:NP_957188]                                                                                   | -4066 | -4061 | 1      | tcgctgt  |
| ENSDARG00000044975 | ENSDART00000030103 | Dr.1361.1.S1_at                                                                           |                |                                                                                                                                                        | -3650 | -3645 | 1      | cgcggtg  |
| ENSDARG00000044975 | ENSDART00000030103 | Dr.1361.1.S1_at                                                                           |                |                                                                                                                                                        | -2276 | -2271 | 1      | agcggtg  |
| ENSDARG00000044975 | ENSDART00000030103 | Dr.1361.1.S1_at                                                                           |                |                                                                                                                                                        | -1621 | -1616 | -1     | ggcggtg  |
| ENSDARG00000044975 | ENSDART00000030103 | Dr.1361.1.S1_at                                                                           |                |                                                                                                                                                        | -4656 | -4651 | -1     | tcgctgt  |
| ENSDARG00000044975 | ENSDART00000030103 | Dr.1361.1.S1_at                                                                           |                |                                                                                                                                                        | -50   | -45   | 1      | agcggtg  |
| ENSDARG00000044983 | ENSDART00000066126 | Dr.7110.1.S1_at                                                                           |                |                                                                                                                                                        | -3372 | -3367 | 1      | agcggtg  |
| ENSDARG00000045180 | ENSDART00000066430 | Dr.20277.1.A1_at                                                                          | NP_997785.1    | actin, alpha 2, smooth muscle, aorta [Source:RefSeq_peptide;Acc:NP_997785]                                                                             | -2999 | -2994 | 1      | agcggtg  |
| ENSDARG00000045230 | ENSDART00000066506 | Dr.956.1.S1_at                                                                            | NP_001002695.1 | zgc:92631 [Source:RefSeq_peptide;Acc:NP_001002695]                                                                                                     | -3672 | -3667 | 1      | tcgctgt  |
| ENSDARG00000045230 | ENSDART00000066506 | Dr.956.1.S1_at                                                                            | NP_001002695.1 | zgc:92631 [Source:RefSeq_peptide;Acc:NP_001002695]                                                                                                     | -3639 | -3634 | -1     | cgcggtg  |
| ENSDARG00000045230 | ENSDART00000066506 | Dr.956.1.S1_at                                                                            | NP_001002695.1 | zgc:92631 [Source:RefSeq_peptide;Acc:NP_001002695]                                                                                                     | -3033 | -3028 | -1     | agcggtg  |
| ENSDARG00000045230 | ENSDART00000066506 | Dr.956.1.S1_at                                                                            | NP_001002695.1 | zgc:92631 [Source:RefSeq_peptide;Acc:NP_001002695]                                                                                                     | -1880 | -1875 | 1      | ggcggtg  |
| ENSDARG00000045230 | ENSDART00000066506 | Dr.956.1.S1_at                                                                            | NP_001002695.1 | zgc:92631 [Source:RefSeq_peptide;Acc:NP_001002695]                                                                                                     | -294  | -289  | -1     | tcgctgt  |
| ENSDARG00000045230 | ENSDART00000066506 | Dr.956.1.S1_at                                                                            | NP_001002695.1 | zgc:92631 [Source:RefSeq_peptide;Acc:NP_001002695]                                                                                                     | -22   | -17   | -1     | ggcggtg  |
| ENSDARG00000045230 | ENSDART00000066506 | Dr.956.1.S1_at                                                                            | NP_001002695.1 | zgc:92631 [Source:RefSeq_peptide;Acc:NP_001002695]                                                                                                     | -4498 | -4493 | -1     | tcgctgt  |
| ENSDARG00000045230 | ENSDART00000066506 | Dr.956.1.S1_at                                                                            | NP_001002695.1 | zgc:92631 [Source:RefSeq_peptide;Acc:NP_001002695]                                                                                                     | -4452 | -4447 | -1     | tcgctgt  |
| ENSDARG00000045407 | ENSDART00000066773 | Dr.10879.1.A1_at                                                                          | NP_001018414.1 | hypothetical protein LOC553602 [Source:RefSeq_peptide;Acc:NP_001018414]                                                                                | -3212 | -3207 | -1     | tcgctgt  |
| ENSDARG00000045407 | ENSDART00000066773 | Dr.10879.1.A1_at                                                                          | NP_001018414.1 | hypothetical protein LOC553602 [Source:RefSeq_peptide;Acc:NP_001018414]                                                                                | -877  | -872  | 1      | agcggtg  |
| ENSDARG00000045407 | ENSDART00000066773 | Dr.10879.1.A1_at                                                                          | NP_001018414.1 | hypothetical protein LOC553602 [Source:RefSeq_peptide;Acc:NP_001018414]                                                                                | -100  | -95   | -1     | agcggtg  |
| ENSDARG00000045567 | ENSDART00000067004 | Dr.13994.1.S1_x_at,Dr.13994.2.A1_a_at,Dr.13994.1.S1_at,Dr.13994.2.A1_x_at,Dr.2819.1.A1_at | zgc:101086     | hypothetical protein LOC445172 [Source:RefSeq_peptide;Acc:NP_001003566]                                                                                | -2856 | -2851 | -1     | tcgctgt  |
| ENSDARG00000045567 | ENSDART00000067004 | Dr.13994.1.S1_x_at,Dr.13994.2.A1_a_at,Dr.13994.1.S1_at,Dr.13994.2.A1_x_at,Dr.2819.1.A1_at | zgc:101086     | hypothetical protein LOC445172 [Source:RefSeq_peptide;Acc:NP_001003566]                                                                                | -2844 | -2839 | -1     | agcggtg  |
| ENSDARG00000045567 | ENSDART00000067004 | Dr.13994.1.S1_x_at,Dr.13994.2.A1_a_at,Dr.13994.1.S1_at,Dr.13994.2.A1_x_at,Dr.2819.1.A1_at | zgc:101086     | hypothetical protein LOC445172 [Source:RefSeq_peptide;Acc:NP_001003566]                                                                                |       |       |        |          |
| ENSDARG00000045585 | ENSDART00000067027 | Dr.13689.1.S1_at                                                                          | zgc:66449      | Unknown (protein for MGC:66449) [Source:RefSeq_peptide;Acc:NP_956095]                                                                                  | -2742 | -2737 | -1     | ggcggtg  |
| ENSDARG00000045585 | ENSDART00000067027 | Dr.13689.1.S1_at                                                                          | zgc:66449      | Unknown (protein for MGC:66449) [Source:RefSeq_peptide;Acc:NP_956095]                                                                                  | -2806 | -2801 | -1     | cgcggtg  |
| ENSDARG00000045678 | ENSDART00000067159 | Dr.15819.1.A1_at,Dr.17776.1.A1_at                                                         | tpH1           | tryptophan hydroxylase 1, like [Source:RefSeq_peptide;Acc:NP_001001843]                                                                                | -4153 | -4148 | -1     | tcgctgt  |
| ENSDARG00000045678 | ENSDART00000067159 | Dr.15819.1.A1_at,Dr.17776.1.A1_at                                                         | tpH1           | tryptophan hydroxylase 1, like [Source:RefSeq_peptide;Acc:NP_001001843]                                                                                | -3633 | -3628 | 1      | tcgctgt  |
| ENSDARG00000045678 | ENSDART00000067159 | Dr.15819.1.A1_at,Dr.17776.1.A1_at                                                         | tpH1           | tryptophan hydroxylase 1, like [Source:RefSeq_peptide;Acc:NP_001001843]                                                                                | -1855 | -1850 | 1      | agcggtg  |
| ENSDARG00000045    |                    |                                                                                           |                |                                                                                                                                                        |       |       |        |          |
