# Supplementary material
Source: PubMed Central journal article supplement (PMC2693207)
Supplement: NIHMS38686-supplement-03.pdf [file NIHMS38686-supplement-03.pdf]

| Supplementary Table 3. Location of putative EREs | Gene ID            | Transcript ID                                                                        | Affy IDs       | Symbol                                                                                                                                      | Description | Start | End | Strand                | Sequence |
|--------------------------------------------------|--------------------|--------------------------------------------------------------------------------------|----------------|---------------------------------------------------------------------------------------------------------------------------------------------|-------------|-------|-----|-----------------------|----------|
| ENSDARG00000000935                               | ENSDART00000001053 | Dr.24249.1.S1_at                                                                     | zcd3dc5        | zinc finger CCH type domain containing 5 [Source:RefSeq_peptide;Acc:NP_956530]                                                              | -2575       | -2557 | 1   | aaagttaactgtgacctt    |          |
| ENSDARG00000001953                               | ENSDART00000003247 | Dr.7626.1.A1_at,Dr.7626.2.S1_at,Dr.23470.1.S1_s_at,Dr.8198.1.A1_at                   | NP_998562.1    | zgc:73257 [Source:RefSeq_peptide;Acc:NP_998562]<br>Kreisl (mouse) maf-related leucine zipper homolog 2.2                                    | 135         | 153   | 1   | aaagcctctgtgacctgc    |          |
| ENSDARG00000002667                               | ENSDART00000003004 | Dr.23470.1.S1_s_at,Dr.8198.1.A1_at                                                   | krml2.2        | [Source:RefSeq_peptide;Acc:NP_571917]<br>Kreisl (mouse) maf-related leucine zipper homolog 2.2                                              | -1337       | -1319 | -1  | tcagcaactgtgaccaac    |          |
| ENSDARG00000002667                               | ENSDART00000003004 | ENSDART00000003004                                                                   | krml2.2        | [Source:RefSeq_peptide;Acc:NP_571917]                                                                                                       | -1337       | -1319 | -1  | tcagcaactgtgaccaac    |          |
| ENSDARG00000003323                               | ENSDART00000017567 | Dr.12575.1.S1_at                                                                     | dcp1a          | decapping enzyme [Source:RefSeq_peptide;Acc:NP_878313]                                                                                      | -1949       | -1931 | 1   | tcagagccatgaccoga     |          |
| ENSDARG00000003323                               | ENSDART00000017567 | Dr.12575.1.S1_at                                                                     | dcp1a          | decapping enzyme [Source:RefSeq_peptide;Acc:NP_878313]                                                                                      | -381        | -363  | 1   | gtgagtaaacatgacctga   |          |
| ENSDARG00000004296                               | ENSDART00000027026 | Dr.26469.1.S1_at                                                                     | zgc:66321      | similar to alpha-1-microglobulin/bikunin precursor [Source:RefSeq_peptide;Acc:NP_957412]                                                    | -4061       | -4043 | -1  | atagtglaatatgacctca   |          |
| ENSDARG00000005186                               | ENSDART00000022285 | Dr.24233.1.S1_at                                                                     | NP_956418.1    | sp4 transcription factor [Source:RefSeq_peptide;Acc:NP_956418]                                                                              | -1496       | -1478 | 1   | tgacctcactgtgaccgct   |          |
| ENSDARG00000006526                               | ENSDART00000017312 | Dr.4412.13.A1_x_at                                                                   | fn1b           | fibronectin 1b (fn1b), mRNA [Source:RefSeq_dna;Acc:NM_001013261]                                                                            | -1176       | -1158 | -1  | tccagttactatgacctt    |          |
| ENSDARG00000008835                               | ENSDART00000021286 | Dr.4412.13.A1_x_at                                                                   |                |                                                                                                                                             | -3795       | -3777 | 1   | caagttgtacgtgacctca   |          |
| ENSDARG00000008835                               | ENSDART00000021286 | Dr.4412.13.A1_x_at                                                                   |                |                                                                                                                                             | -613        | -595  | 1   | gaagggcacggtgacctt    |          |
| ENSDARG00000008895                               | ENSDART00000040312 | Dr.1619.1.A1_at,Dr.1619.1.A1_at,Dr.1619.1.A1_at                                      |                |                                                                                                                                             | -3866       | -3848 | 1   | caacatcactctgaccaga   |          |
| ENSDARG00000008895                               | ENSDART00000044775 | Dr.1619.1.A1_at,Dr.1619.1.A1_at,Dr.1619.1.A1_at                                      |                |                                                                                                                                             | -3872       | -3854 | 1   | caacatcactctgaccaga   |          |
| ENSDARG00000009483                               | ENSDART00000099889 | Dr.25378.1.A1_at,Dr.24858.1.S1_at                                                    | zgc:110540     | deoxycytidine kinase [Source:RefSeq_peptide;Acc:NP_001014374]                                                                               | -2635       | -2617 | 1   | tcagttcatttgcacctg    |          |
| ENSDARG00000009483                               | ENSDART00000099889 | Dr.25378.1.A1_at,Dr.24858.1.S1_at                                                    | zgc:110540     | deoxycytidine kinase [Source:RefSeq_peptide;Acc:NP_001014374]                                                                               | -2635       | -2617 | 1   | tcagttcatttgcacctg    |          |
| ENSDARG00000013454                               | ENSDART00000019328 | Dr.16524.1.S1_at                                                                     | wu:fc12b04     | protein-glutamine gamma-glutamyltransferase [Source:RefSeq_peptide;Acc:NP_997821]                                                           | -4284       | -4266 | 1   | ggaagccgctgtgacctga   |          |
| ENSDARG00000013613                               | ENSDART00000018408 | Dr.16504.1.A1_at                                                                     | zgc:112421     | hypothetical protein LOC554118 [Source:RefSeq_peptide;Acc:NP_001019585]                                                                     | -2201       | -2183 | 1   | atgagttcgttgcacctg    |          |
| ENSDARG00000013613                               | ENSDART00000018408 | Dr.1605.1.S1_at                                                                      |                |                                                                                                                                             |             |       |     |                       |          |
| ENSDARG00000013646                               | ENSDART00000019664 | Dr.15930.1.A1_at                                                                     | serpina1       | serine (or cysteine) proteinase inhibitor, clade A (alpha-1 antiproteinase, antitrypsin), member 1 [Source:RefSeq_peptide;Acc:NP_001013277] | -267        | -249  | -1  | ttatgggacctgacctt     |          |
| ENSDARG00000014209                               | ENSDART00000023208 | Dr.728.4.S1_at,Dr.728.4.S1_at,Dr.728.4.S1_at                                         | NP_001017836.1 | hypothetical protein LOC550534 [Source:RefSeq_peptide;Acc:NP_001017836]                                                                     | -1492       | -1474 | 1   | ttttttactgtgacctga    |          |
| ENSDARG00000015866                               | ENSDART00000019110 | Dr.728.4.S1_at,Dr.728.4.S1_at,Dr.728.4.S1_at                                         |                |                                                                                                                                             | -1647       | -1629 | -1  | gctattatttgacctga     |          |
| ENSDARG00000015866                               | ENSDART00000058963 | Dr.728.4.S1_at,Dr.728.4.S1_at,Dr.728.4.S1_at                                         |                |                                                                                                                                             | -1945       | -1927 | -1  | gctattatttgacctga     |          |
| ENSDARG00000015866                               | ENSDART00000058964 | Dr.728.4.S1_at,Dr.728.4.S1_at,Dr.728.4.S1_at                                         |                |                                                                                                                                             | -1647       | -1629 | -1  | gctattatttgacctga     |          |
| ENSDARG00000016448                               | ENSDART00000014979 | Dr.2978.1.S1_at                                                                      | vg3            | Vitellogenin 3 (Fragment). [Source:Uniprot/SPTREMBL;Acc:Q9DFT9]                                                                             | -386        | -368  | -1  | acaggtcaatgtgacctg    |          |
| ENSDARG00000016448                               | ENSDART00000014979 | Dr.2978.1.S1_at                                                                      | vg3            | Vitellogenin 3 (Fragment). [Source:Uniprot/SPTREMBL;Acc:Q9DFT9]                                                                             | -386        | -368  | -1  | actgatcacctgtgacctg   |          |
| ENSDARG00000016448                               | ENSDART00000014979 | Dr.2978.1.S1_at                                                                      | vg3            | Vitellogenin 3 (Fragment). [Source:Uniprot/SPTREMBL;Acc:Q9DFT9]                                                                             | -4076       | -4058 | 1   | actaataatttgacctca    |          |
| ENSDARG00000016825                               | ENSDART00000050238 | Dr.25009.6.A1_a_at,Dr.25009.1.S1_a_at                                                | NP_739573.1    | vitellogenin 1 [Source:RefSeq_peptide;Acc:NP_739573]                                                                                        | -3275       | -3257 | 1   | acaggttaaagtgacctt    |          |
| ENSDARG00000016825                               | ENSDART00000050238 | Dr.25009.6.A1_a_at,Dr.25009.1.S1_a_at                                                | NP_739573.1    | vitellogenin 1 [Source:RefSeq_peptide;Acc:NP_739573]                                                                                        | -3275       | -3257 | -1  | aaagttcaacttaacctg    |          |
| ENSDARG00000016825                               | ENSDART00000050238 | Dr.25009.6.A1_a_at,Dr.25009.1.S1_a_at                                                | NP_739573.1    | vitellogenin 1 [Source:RefSeq_peptide;Acc:NP_739573]                                                                                        | -2166       | -2148 | 1   | cgagggcaactaaccctaa   |          |
| ENSDARG00000016825                               | ENSDART00000050238 | Dr.25009.6.A1_a_at,Dr.25009.1.S1_a_at                                                | NP_739573.1    | vitellogenin 1 [Source:RefSeq_peptide;Acc:NP_739573]                                                                                        | -175        | -157  | 1   | acagggccaggttaacctaa  |          |
| ENSDARG00000016825                               | ENSDART00000050238 | Dr.25009.6.A1_a_at,Dr.25009.1.S1_a_at                                                | NP_739573.1    | vitellogenin 1 [Source:RefSeq_peptide;Acc:NP_739573]                                                                                        | -3275       | -3257 | 1   | acaggttaaagtgacctt    |          |
| ENSDARG00000016825                               | ENSDART00000050238 | Dr.25009.6.A1_a_at,Dr.25009.1.S1_a_at                                                | NP_739573.1    | vitellogenin 1 [Source:RefSeq_peptide;Acc:NP_739573]                                                                                        | -3275       | -3257 | -1  | aaagttcaacttaacctg    |          |
| ENSDARG00000016825                               | ENSDART00000050238 | Dr.25009.6.A1_a_at,Dr.25009.1.S1_a_at                                                | NP_739573.1    | vitellogenin 1 [Source:RefSeq_peptide;Acc:NP_739573]                                                                                        | -2166       | -2148 | 1   | cgagggcaactaaccctaa   |          |
| ENSDARG00000016825                               | ENSDART00000050238 | Dr.25009.6.A1_a_at,Dr.25009.1.S1_a_at                                                | NP_739573.1    | vitellogenin 1 [Source:RefSeq_peptide;Acc:NP_739573]                                                                                        | -175        | -157  | 1   | acagggccaggttaacctaa  |          |
| ENSDARG00000017289                               | ENSDART00000047865 | Dr.25331.1.S1_at,Dr.25379.1.S1_at,Dr.3025.3.S1_at,Dr.25331.1.S1_at,Dr.25379.1.S1_at  |                |                                                                                                                                             | -1425       | -1407 | 1   | tgagttctaaagtgacctg   |          |
| ENSDARG00000017289                               | ENSDART00000050670 | Dr.25331.1.S1_at,Dr.25379.1.S1_at,Dr.3025.3.S1_at,Dr.25331.1.S1_at,Dr.25379.1.S1_at  |                |                                                                                                                                             | -1728       | -1710 | 1   | tgagttctaaagtgacctg   |          |
| ENSDARG00000017289                               | ENSDART00000047865 | Dr.25331.1.S1_at,Dr.25379.1.S1_at,Dr.3025.3.S1_at,Dr.25331.1.S1_at,Dr.25379.1.S1_at  |                |                                                                                                                                             | -1425       | -1407 | 1   | tgagttctaaagtgacctg   |          |
| ENSDARG00000017289                               | ENSDART00000050670 | Dr.25331.1.S1_at,Dr.25379.1.S1_at,Dr.3025.3.S1_at,Dr.25331.1.S1_at,Dr.25379.1.S1_at  |                |                                                                                                                                             | -1728       | -1710 | 1   | tgagttctaaagtgacctg   |          |
| ENSDARG00000017619                               | ENSDART00000038499 | Dr.25379.1.S1_at,Dr.3025.3.S1_at,Dr.25379.1.S1_at,Dr.3025.3.S1_at                    |                |                                                                                                                                             | -503        | -485  | -1  | tcagggacactctgatctac  |          |
| ENSDARG00000017619                               | ENSDART00000038499 | Dr.25379.1.S1_at,Dr.3025.3.S1_at,Dr.25379.1.S1_at,Dr.3025.3.S1_at                    |                |                                                                                                                                             | -503        | -485  | -1  | tcagggacactctgatctac  |          |
| ENSDARG00000017624                               | ENSDART00000012644 | Dr.4387.1.S1_at                                                                      | krt4           | keratin 4 [Source:RefSeq_peptide;Acc:NP_571584]                                                                                             | -937        | -919  | -1  | ataggttggttgacctaa    |          |
| ENSDARG00000018529                               | ENSDART00000020545 | Dr.4249.1.S1_at                                                                      | lipf           | lipase, gastric [Source:RefSeq_peptide;Acc:NP_998569]                                                                                       | -1057       | -1039 | 1   | tgatgtggcgtgacctgt    |          |
| ENSDARG00000019302                               | ENSDART00000007649 | Dr.25285.1.S1_at,Dr.11211.1.S1_at                                                    | zgc:73223      | hypothetical protein MGC73223 [Source:RefSeq_peptide;Acc:NP_957126]                                                                         | 29          | 47    | -1  | accaggaatgaccttt      |          |
| ENSDARG00000019862                               | ENSDART00000009054 | Dr.913.1.S1_at                                                                       | zgc:63909      | tropomyosin 4 isoform 2 [Source:RefSeq_peptide;Acc:NP_998323]                                                                               | -4507       | -4489 | -1  | tcaggagaatgaccacaaa   |          |
| ENSDARG00000020485                               | ENSDART00000011573 | Dr.10314.1.S1_a_at                                                                   |                |                                                                                                                                             | -1349       | -1331 | -1  | tcgggtgtgtggctgcta    |          |
| ENSDARG00000021443                               | ENSDART00000014168 | Dr.24122.1.A1_at                                                                     | NP_955943.1    | CCCH zinc finger protein C3H-2 [Source:RefSeq_peptide;Acc:NP_955943]                                                                        | -1795       | -1777 | 1   | tccagttactatgacctt    |          |
| ENSDARG00000023820                               | ENSDART00000038857 | Dr.8390.1.S1_at                                                                      | zgc:55420      | hypothetical protein LOC406828 [Source:RefSeq_peptide;Acc:NP_998672]                                                                        | -3604       | -3586 | 1   | gcagcacacactgaccacc   |          |
| ENSDARG00000023963                               | ENSDART00000036075 | Dr.913.1.S1_at                                                                       |                |                                                                                                                                             | -4731       | -4713 | 1   | tcaggagaatgaccacaaa   |          |
| ENSDARG00000024892                               | ENSDART00000033228 | Dr.3025.3.S1_at,Dr.25379.1.S1_at,Dr.3025.3.S1_at,Dr.25331.1.S1_at,Dr.25379.1.S1_at   |                |                                                                                                                                             | -2075       | -2057 | -1  | caaagtgtctctgaccacaa  |          |
| ENSDARG00000024892                               | ENSDART00000033228 | Dr.3025.3.S1_at,Dr.25379.1.S1_at,Dr.3025.3.S1_at,Dr.25331.1.S1_at,Dr.25379.1.S1_at   |                |                                                                                                                                             | -4197       | -4179 | -1  | gttagattttgtgaccgga   |          |
| ENSDARG00000024892                               | ENSDART00000033228 | Dr.3025.3.S1_at,Dr.25379.1.S1_at,Dr.3025.3.S1_at,Dr.25331.1.S1_at,Dr.25379.1.S1_at   |                |                                                                                                                                             | -2075       | -2057 | -1  | caaagtgtctctgaccacaa  |          |
| ENSDARG00000024892                               | ENSDART00000033228 | Dr.3025.3.S1_at,Dr.25379.1.S1_at,Dr.3025.3.S1_at,Dr.25331.1.S1_at,Dr.25379.1.S1_at   |                |                                                                                                                                             | -4197       | -4179 | -1  | gttagattttgtgaccgga   |          |
| ENSDARG00000025400                               | ENSDART00000044869 | Dr.25009.4.A1_at,Dr.25009.4.A1_at,Dr.25009.4.A1_at,Dr.25009.4.A1_at                  |                |                                                                                                                                             | -4281       | -4263 | 1   | aaagtgcagtgtgaccggg   |          |
| ENSDARG00000025400                               | ENSDART00000046418 | Dr.25009.4.A1_at,Dr.25009.4.A1_at,Dr.25009.4.A1_at,Dr.25009.4.A1_at                  |                |                                                                                                                                             | -4281       | -4263 | 1   | aaagtgcagtgtgaccggg   |          |
| ENSDARG00000025400                               | ENSDART00000061150 | Dr.25009.4.A1_at,Dr.25009.4.A1_at,Dr.25009.4.A1_at,Dr.25009.4.A1_at                  |                |                                                                                                                                             | -4380       | -4362 | 1   | aaagtgcagtgtgaccggg   |          |
| ENSDARG00000025400                               | ENSDART00000061161 | Dr.25009.4.A1_at,Dr.25009.4.A1_at,Dr.25009.4.A1_at,Dr.25009.4.A1_at                  |                |                                                                                                                                             | -4281       | -4263 | 1   | aaagtgcagtgtgaccggg   |          |
| ENSDARG00000025400                               | ENSDART00000061165 | Dr.25009.4.A1_at,Dr.25009.4.A1_at,Dr.25009.4.A1_at,Dr.25009.4.A1_at                  |                |                                                                                                                                             | -4281       | -4263 | 1   | aaagtgcagtgtgaccggg   |          |
| ENSDARG00000026039                               | ENSDART00000038200 | Dr.9478.1.S1_at                                                                      | cyp1a          | cytochrome P450, family 1, subfamily A [Source:RefSeq_peptide;Acc:NP_571954]                                                                | -4819       | -4801 | 1   | aaagttcaactgtgacctg   |          |
| ENSDARG00000026090                               | ENSDART00000035302 | Dr.12833.1.A1_at                                                                     | zgc:64213      | hypothetical protein LOC393393 [Source:RefSeq_peptide;Acc:NP_956715]                                                                        | -36         | -18   | -1  | ctagataaactgaccgga    |          |
| ENSDARG00000026680                               | ENSDART00000036600 | Dr.26139.1.A1_at,Dr.26139.1.A1_x_at                                                  | slc25a14       | solute carrier family 25 (mitochondrial carrier, brain), member 14 [Source:RefSeq_peptide;Acc:NP_956458]                                    | -774        | -756  | -1  | tcaattcaactgaccgga    |          |
| ENSDARG00000026680                               | ENSDART00000036600 | Dr.26139.1.A1_at,Dr.26139.1.A1_x_at                                                  | slc25a14       | solute carrier family 25 (mitochondrial carrier, brain), member 14 [Source:RefSeq_peptide;Acc:NP_956458]                                    | -774        | -756  | -1  | tcaattcaactgaccgga    |          |
| ENSDARG00000027088                               | ENSDART00000039267 | Dr.1192.1.S1_at,Dr.1192.1.S1_a_at                                                    | wu:fb11h03     | prostaglandin D2 synthase [Source:RefSeq_peptide;Acc:NP_998799]                                                                             | -740        | -722  | 1   | ttatgtcaactgaccacaaa  |          |
| ENSDARG00000027088                               | ENSDART00000039267 | Dr.1192.1.S1_at,Dr.1192.1.S1_a_at                                                    | wu:fb11h03     | prostaglandin D2 synthase [Source:RefSeq_peptide;Acc:NP_998799]                                                                             | -669        | -651  | 1   | ataagttcaactgaccacaaa |          |
| ENSDARG00000027088                               | ENSDART00000039267 | Dr.1192.1.S1_at,Dr.1192.1.S1_a_at                                                    | wu:fb11h03     | prostaglandin D2 synthase [Source:RefSeq_peptide;Acc:NP_998799]                                                                             | -740        | -722  | 1   | ttatgtcaactgaccacaaa  |          |
| ENSDARG00000027088                               | ENSDART00000039267 | Dr.1192.1.S1_at,Dr.1192.1.S1_a_at                                                    | wu:fb11h03     | prostaglandin D2 synthase [Source:RefSeq_peptide;Acc:NP_998799]                                                                             | -669        | -651  | 1   | ataagttcaactgaccacaaa |          |
| ENSDARG00000027924                               | ENSDART00000051147 | Dr.25593.2.A1_at,Dr.25593.1.S1_at,Dr.4412.12.A1_at,Dr.25593.2.A1_at,Dr.25593.1.S1_at |                |                                                                                                                                             | -2247       | -2229 | -1  | taaaatcggttgacctt     |          |
| ENSDARG00000027924                               | ENSDART00000051147 | Dr.25593.2.A1_at,Dr.25593.1.S1_at,Dr.4412.12.A1_at,Dr.25593.2.A1_at,Dr.25593.1.S1_at |                |                                                                                                                                             | -4561       | -4543 | -1  | caagttgtgacctgacctca  |          |
| ENSDARG00000027924                               | ENSDART00000051147 | Dr.25593.2.A1_at,Dr.25593.1.S1_at,Dr.4412.12.A1_at,Dr.25593.2.A1_at,Dr.25593.1.S1_at |                |                                                                                                                                             | -2247       | -2229 | -1  | taaaatcggttgacctt     |          |

Supplementary Table 3 (cont.). Location of putative EREs

| Gene ID            | Transcript ID      | Affy IDs                                                                                                                                  | Symbol           | Description                                                                                                                                              | Start | End   | Strand | Sequence            |
|--------------------|--------------------|-------------------------------------------------------------------------------------------------------------------------------------------|------------------|----------------------------------------------------------------------------------------------------------------------------------------------------------|-------|-------|--------|---------------------|
| ENSDARG00000027924 | ENSDART00000051147 | Dr.25593.2.A1_at,Dr.25593.1.S1_at,Dr.4412.12.A1_at,Dr.25593.2.A1_at,Dr.25593.1.S1_at,Dr.4412.12.A1_at,Dr.25527.1.A1_x_at,Dr.25527.1.A1_at |                  |                                                                                                                                                          | -4561 | -4543 | -1     | caagttgacgtgacccta  |
| ENSDARG00000027924 | ENSDART00000051147 | Dr.25593.2.A1_at,Dr.25593.1.S1_at,Dr.4412.12.A1_at,Dr.25593.2.A1_at,Dr.25593.1.S1_at,Dr.4412.12.A1_at,Dr.25527.1.A1_x_at,Dr.25527.1.A1_at |                  |                                                                                                                                                          | -2247 | -2229 | -1     | taaaatcggttgaccitt  |
| ENSDARG00000027924 | ENSDART00000051147 | Dr.1282.1.S1_at                                                                                                                           | krb8             | keratin 8 [Source:RefSeq_peptide;Acc:NP_956374]                                                                                                          | -4561 | -4543 | -1     | caagttgacgtgacccta  |
| ENSDARG00000029086 | ENSDART00000011928 | Dr.1368.7.S1_at                                                                                                                           | zgc:91877        | hypothetical protein LOC337397 [Source:RefSeq_peptide;Acc:NP_997941]                                                                                     | -218  | -200  | -1     | glaattcaatgaccaga   |
| ENSDARG00000030236 | ENSDART00000048550 | Dr.9682.1.A1_at                                                                                                                           |                  |                                                                                                                                                          | -3947 | -3929 | -1     | gccaatcaacgtgaccga  |
| ENSDARG00000031664 | ENSDART00000049339 | Dr.8215.1.A1_at                                                                                                                           | sox21a           | SRY-box 21 [Source:RefSeq_peptide;Acc:NP_571361]                                                                                                         | -1860 | -1842 | -1     | gcacgtgcctgacgttg   |
| ENSDARG00000033735 | ENSDART00000049874 | Dr.2973.1.A1_at,Dr.2973.1.A1_at                                                                                                           | Q4Z8P3_BRARE     | Neutrophil cytosolic factor 1. [Source:Uniprot/SPTREMBL;Acc:Q4Z8P3]                                                                                      | -4888 | -4870 | 1      | ctggagcaacctgaccct  |
| ENSDARG00000033735 | ENSDART00000049874 | Dr.2973.1.A1_at,Dr.2973.1.A1_at                                                                                                           | Q4Z8P3_BRARE     | Neutrophil cytosolic factor 1. [Source:Uniprot/SPTREMBL;Acc:Q4Z8P3]                                                                                      | -3790 | -3772 | -1     | aaagcaactgtgaccctg  |
| ENSDARG00000033735 | ENSDART00000050898 | Dr.2973.1.A1_at,Dr.2973.1.A1_at                                                                                                           | Q4Z8P3_BRARE     | Neutrophil cytosolic factor 1. [Source:Uniprot/SPTREMBL;Acc:Q4Z8P3]                                                                                      | -2927 | -2909 | -1     | tgagcctatgaccaccg   |
| ENSDARG00000033735 | ENSDART00000050898 | Dr.2973.1.A1_at,Dr.2973.1.A1_at                                                                                                           | Q4Z8P3_BRARE     | Neutrophil cytosolic factor 1. [Source:Uniprot/SPTREMBL;Acc:Q4Z8P3]                                                                                      | -1290 | -1272 | -1     | tgatgtaattgacacct   |
| ENSDARG00000033735 | ENSDART00000050898 | Dr.2973.1.A1_at,Dr.2973.1.A1_at                                                                                                           | Q4Z8P3_BRARE     | Neutrophil cytosolic factor 1. [Source:Uniprot/SPTREMBL;Acc:Q4Z8P3]                                                                                      | -3845 | -3827 | -1     | aaagcaactgtgaccctg  |
| ENSDARG00000033735 | ENSDART00000050898 | Dr.2973.1.A1_at,Dr.2973.1.A1_at                                                                                                           | Q4Z8P3_BRARE     | Neutrophil cytosolic factor 1. [Source:Uniprot/SPTREMBL;Acc:Q4Z8P3]                                                                                      | -2982 | -2964 | -1     | tgagcctatgaccaccg   |
| ENSDARG00000033735 | ENSDART00000050898 | Dr.2973.1.A1_at,Dr.2973.1.A1_at                                                                                                           | Q4Z8P3_BRARE     | Neutrophil cytosolic factor 1. [Source:Uniprot/SPTREMBL;Acc:Q4Z8P3]                                                                                      | -1345 | -1327 | -1     | tgatgtaattgacacct   |
| ENSDARG00000033770 | ENSDART00000011961 | Dr.25009.6.A1_a_at                                                                                                                        | vg1              | Vitellogenin 1 (Fragment). [Source:Uniprot/SPTREMBL;Acc:Q8JH36]                                                                                          | -179  | -161  | 1      | gcagggcaactgacctaa  |
| ENSDARG00000035160 | ENSDART00000050933 | Dr.13775.1.S1_at                                                                                                                          |                  |                                                                                                                                                          | -2271 | -2253 | -1     | ttggtaacctgacctgc   |
| ENSDARG00000035743 | ENSDART00000051853 | Dr.14748.1.S1_at                                                                                                                          | zgc:63985        | Unknown (protein for MGC:63985) [Source:RefSeq_peptide;Acc:NP_956252]                                                                                    | -4293 | -4275 | -1     | acaatgagctctgacctg  |
| ENSDARG00000036481 | ENSDART00000053001 | Dr.6550.1.A1_at                                                                                                                           | Q6PG35_BRARE     | LOC407646 protein (Fragment). [Source:Uniprot/SPTREMBL;Acc:Q6PG35]                                                                                       | -806  | -788  | -1     | aaatggaaattgacctc   |
| ENSDARG00000036517 | ENSDART00000053070 | Dr.1411.1.S1_at                                                                                                                           |                  |                                                                                                                                                          |       |       |        |                     |
| ENSDARG00000036519 | ENSDART00000053072 | Dr.1411.1.S1_at                                                                                                                           | si:xx-by187g17.1 | [Source:Uniprot/SPTREMBL;Acc:Q6ZM17]                                                                                                                     | -1684 | -1646 | 1      | tcocgpggtgacctc     |
| ENSDARG00000036519 | ENSDART00000053072 | Dr.1411.1.S1_at                                                                                                                           | hbaa1            | Hemoglobin alpha chain (Alpha globin aa1). [Source:Uniprot/SWISSPROT;Acc:Q90487]                                                                         | -3250 | -3232 | 1      | acaattcacttgacctc   |
| ENSDARG00000036521 | ENSDART00000053073 | Dr.25155.1.S1_s_at                                                                                                                        | hbaa1            | Hemoglobin alpha chain (Alpha globin aa1). [Source:Uniprot/SWISSPROT;Acc:Q90487]                                                                         | -1642 | -1624 | -1     | tcocgpggtgacctc     |
| ENSDARG00000036527 | ENSDART00000053078 | Dr.1411.1.S1_at                                                                                                                           | ba2              | Hemoglobin beta-1 chain (BetaA1 globin). [Source:Uniprot/SWISSPROT;Acc:Q90486]                                                                           | -4287 | -4249 | -1     | tcocgpggtgacctc     |
| ENSDARG00000036528 | ENSDART00000053080 | Dr.8723.1.S1_at                                                                                                                           | NP_001002461.1   | si:xx-by187g17.1 NP_001002461.1 [Source:RefSeq_dna;Acc:NM_131257]                                                                                        | -1684 | -1646 | 1      | tcocgpggtgacctc     |
| ENSDARG00000036531 | ENSDART00000053083 | Dr.1411.1.S1_at                                                                                                                           | hbaa1            | Hemoglobin alpha chain (Alpha globin aa1). [Source:Uniprot/SWISSPROT;Acc:Q90487]                                                                         | -273  | -255  | 1      | acaattcacttgacctc   |
| ENSDARG00000036531 | ENSDART00000053083 | Dr.1411.1.S1_at                                                                                                                           | hbaa1            | Hemoglobin alpha chain (Alpha globin aa1). [Source:Uniprot/SWISSPROT;Acc:Q90487]                                                                         | -3243 | -3225 | -1     | acaattcacttgacctc   |
| ENSDARG00000036535 | ENSDART00000042396 | Dr.25155.1.S1_s_at                                                                                                                        | ba2              | Hemoglobin beta-1 chain (BetaA1 globin). [Source:Uniprot/SWISSPROT;Acc:Q90486]                                                                           | -1636 | -1618 | 1      | tcocgpggtgacctc     |
| ENSDARG00000036776 | ENSDART00000053399 | Dr.16380.1.A1_at                                                                                                                          | NP_001004540.1   | aldehyde dehydrogenase 8 family, member A1 [Source:RefSeq_peptide;Acc:NP_001004540]                                                                      | -4257 | -4239 | -1     | tcocgpggtgacctc     |
| ENSDARG00000036776 | ENSDART00000053399 | Dr.16380.1.A1_at                                                                                                                          | NP_001004540.1   | aldehyde dehydrogenase 8 family, member A1 [Source:RefSeq_peptide;Acc:NP_001004540]                                                                      | -2837 | -2819 | 1      | acaactctttgacctgt   |
| ENSDARG00000036893 | ENSDART00000053567 | Dr.16206.1.A1_at,Dr.16206.1.A1_s_at                                                                                                       |                  |                                                                                                                                                          | -549  | -531  | -1     | ataagctcaatgacctaa  |
| ENSDARG00000036893 | ENSDART00000053567 | Dr.16206.1.A1_at,Dr.16206.1.A1_s_at                                                                                                       |                  |                                                                                                                                                          | -3911 | -3893 | -1     | taaaattattgaccctaa  |
| ENSDARG00000036893 | ENSDART00000053567 | Dr.16206.1.A1_at,Dr.16206.1.A1_s_at                                                                                                       |                  |                                                                                                                                                          | -1045 | -1027 | -1     | acagaagtgtgaccctaa  |
| ENSDARG00000036893 | ENSDART00000053567 | Dr.16206.1.A1_at,Dr.16206.1.A1_s_at                                                                                                       |                  |                                                                                                                                                          | -3911 | -3893 | -1     | taaaattattgaccctaa  |
| ENSDARG00000039027 | ENSDART00000056969 | Dr.4797.1.S1_at,Dr.4797.1.S1_at                                                                                                           |                  |                                                                                                                                                          | -1045 | -1027 | -1     | acagaagtgtgaccctaa  |
| ENSDARG00000039150 | ENSDART00000057192 | Dr.24341.1.S1_at                                                                                                                          | zgc:76953        | hypothetical protein LOC406625 [Source:RefSeq_peptide;Acc:NP_999924]                                                                                     | -3691 | -3673 | -1     | ataagtaactgacctc    |
| ENSDARG00000039728 | ENSDART00000037346 | Dr.3581.1.S1_at,Dr.3581.1.S1_a_at                                                                                                         | ctrb1            | chymotrypsinogen B1 [Source:RefSeq_peptide;Acc:NP_997783]                                                                                                | -4485 | -4467 | -1     | ggcaataattgacctc    |
| ENSDARG00000039747 | ENSDART00000058095 | Dr.4797.1.S1_at                                                                                                                           |                  |                                                                                                                                                          | -3957 | -3939 | -1     | ttgttaactgacctc     |
| ENSDARG00000040251 | ENSDART00000011497 | Dr.4048.1.S1_at                                                                                                                           | zgc:110367       | hypothetical protein LOC550475 [Source:RefSeq_peptide;Acc:NP_001017778]                                                                                  | -908  | -890  | -1     | tcagtcatctgacctc    |
| ENSDARG00000040251 | ENSDART00000011497 | Dr.4048.1.S1_at                                                                                                                           | zgc:110367       | hypothetical protein LOC550475 [Source:RefSeq_peptide;Acc:NP_001017778]                                                                                  | -3906 | -3888 | -1     | ttaggtttattgacctc   |
| ENSDARG00000040251 | ENSDART00000011497 | Dr.4048.1.S1_at                                                                                                                           | zgc:110367       | hypothetical protein LOC550475 [Source:RefSeq_peptide;Acc:NP_001017778]                                                                                  | -3370 | -3352 | -1     | agattgacctgaccctg   |
| ENSDARG00000040251 | ENSDART00000011497 | Dr.4048.1.S1_at                                                                                                                           | zgc:110367       | hypothetical protein LOC550475 [Source:RefSeq_peptide;Acc:NP_001017778]                                                                                  | -2569 | -2551 | -1     | ccagttgacctgaccctg  |
| ENSDARG00000040251 | ENSDART00000011497 | Dr.4048.1.S1_at                                                                                                                           | zgc:110367       | hypothetical protein LOC550475 [Source:RefSeq_peptide;Acc:NP_001017778]                                                                                  | -1128 | -1110 | -1     | ctggaacacctgacctt   |
| ENSDARG00000040295 | ENSDART00000058965 | Dr.1246.1.S1_at                                                                                                                           | apoeb            | Apolipoprotein Eb precursor (Apo-Eb). [Source:Uniprot/SWISSPROT;Acc:O42364]                                                                              | -1366 | -1348 | -1     | aaagtaattgacctc     |
| ENSDARG00000040527 | ENSDART00000059311 | Dr.20722.1.S1_at                                                                                                                          | NP_956583.1      | similar to yolk sac gene 2 [Source:RefSeq_peptide;Acc:NP_956583]                                                                                         | -3077 | -3059 | -1     | aaagtaattgacctc     |
| ENSDARG00000040528 | ENSDART00000059314 | Dr.5853.1.A1_at                                                                                                                           | zgc:77059        | hypothetical protein LOC405809 [Source:RefSeq_peptide;Acc:NP_998038]                                                                                     | -4761 | -4743 | -1     | tcagtcatctgacctc    |
| ENSDARG00000040856 | ENSDART00000059886 | Dr.4212.1.S1_at                                                                                                                           | ldha             | L-lactate dehydrogenase A chain (EC 1.1.1.27) (LDH-A). [Source:Uniprot/SWISSPROT;Acc:Q9PVK5]                                                             | -404  | -386  | -1     | ataggcaglattgacctc  |
| ENSDARG00000041639 | ENSDART00000044076 | Dr.25379.1.S1_at,Dr.23812.1.A1_at,Dr.25379.1.S1_at,Dr.3025.3.S1_at                                                                        |                  |                                                                                                                                                          | -1784 | -1766 | 1      | agagatcacatgaccctaa |
| ENSDARG00000041639 | ENSDART00000044076 | Dr.25379.1.S1_at,Dr.23812.1.A1_at,Dr.25379.1.S1_at,Dr.3025.3.S1_at                                                                        |                  |                                                                                                                                                          | -1603 | -1585 | -1     | tcctgacctgacctc     |
| ENSDARG00000041639 | ENSDART00000044076 | Dr.25379.1.S1_at,Dr.23812.1.A1_at,Dr.25379.1.S1_at,Dr.3025.3.S1_at                                                                        |                  |                                                                                                                                                          | -1784 | -1766 | 1      | agagatcacatgaccctaa |
| ENSDARG00000041639 | ENSDART00000044076 | Dr.25379.1.S1_at,Dr.23812.1.A1_at,Dr.25379.1.S1_at,Dr.3025.3.S1_at                                                                        |                  |                                                                                                                                                          | -1603 | -1585 | -1     | tcctgacctgacctc     |
| ENSDARG00000041639 | ENSDART00000061043 | Dr.25331.1.S1_at,Dr.25379.1.S1_at,Dr.25331.1.S1_at,Dr.25379.1.S1_at                                                                       |                  |                                                                                                                                                          | -4961 | -4943 | -1     | caaagtgtctgaccctg   |
| ENSDARG00000041774 | ENSDART00000061223 | Dr.25009.6.A1_a_at                                                                                                                        |                  |                                                                                                                                                          | -1168 | -1150 | -1     | acagtgaactgaccctg   |
| ENSDARG00000041774 | ENSDART00000061223 | Dr.25009.6.A1_a_at                                                                                                                        |                  |                                                                                                                                                          | -190  | -172  | -1     | aaagccagggtgacctc   |
| ENSDARG00000042035 | ENSDART00000061601 | Dr.7110.1.S1_at                                                                                                                           | zgc:77614        | hypothetical protein LOC393868 [Source:RefSeq_peptide;Acc:NP_957188]                                                                                     | -2474 | -2456 | -1     | aacgcaaaactgacctc   |
| ENSDARG00000042040 | ENSDART00000061613 | Dr.7110.1.S1_at                                                                                                                           |                  |                                                                                                                                                          | -2186 | -2168 | -1     | aacgcaaaactgacctc   |
| ENSDARG00000042046 | ENSDART00000061618 | Dr.7110.1.S1_at                                                                                                                           | zgc:77614        | hypothetical protein LOC393868 [Source:RefSeq_peptide;Acc:NP_957188]                                                                                     | -2155 | -2137 | -1     | aacgcaaaactgacctc   |
| ENSDARG00000042391 | ENSDART00000062156 | Dr.14748.1.S1_at                                                                                                                          | zgc:63985        | zgc:63985 (zgc:63985), mRNA [Source:RefSeq_dna;Acc:NM_199958]                                                                                            | -4265 | -4247 | -1     | acagtgaactgacctc    |
| ENSDARG00000043618 | ENSDART00000064041 | Dr.7236.1.A1_at,Dr.7236.1.A1_at                                                                                                           |                  |                                                                                                                                                          | -2063 | -2045 | -1     | ctggagcaactgacctc   |
| ENSDARG00000043618 | ENSDART00000064044 | Dr.7236.1.A1_at,Dr.7236.1.A1_at                                                                                                           |                  |                                                                                                                                                          | -2063 | -2045 | -1     | ctggagcaactgacctc   |
| ENSDARG00000043670 | ENSDART00000024462 |                                                                                                                                           |                  |                                                                                                                                                          |       |       |        |                     |
| ENSDARG00000043960 | ENSDART00000064542 | Dr.6147.1.A1_at                                                                                                                           | NM_001013259.1   | serine (or cysteine) proteinase inhibitor, clade A (alpha-1 antiproteinase, antitrypsin), member 1 (serpina1), mRNA [Source:RefSeq_dna;Acc:NM_001013259] | -688  | -670  | 1      | atgattgacctgacctc   |
| ENSDARG00000043990 | ENSDART00000064579 | Dr.7806.1.A1_at                                                                                                                           | zgc:77150        | hypothetical protein LOC406587 [Source:RefSeq_peptide;Acc:NP_999913]                                                                                     | -831  | -813  | -1     | tcacccctctgacctc    |
| ENSDARG00000044002 | ENSDART00000064591 | Dr.11609.1.S1_at,Dr.11609.1.S1_at                                                                                                         | NP_001002187.1   | hypothetical protein LOC431734 [Source:RefSeq_peptide;Acc:NP_001002187]                                                                                  | -4078 | -4060 | -1     | tgccgactctgacctc    |
| ENSDARG00000044125 | ENSDART00000064789 | Dr.8723.1.S1_at                                                                                                                           | zgc:92903        | zgc:92903 [Source:RefSeq_peptide;Acc:NP_001002461]                                                                                                       | -2977 | -2959 | -1     | caagtatttacctc      |
| ENSDARG00000044176 | ENSDART00000064858 | Dr.23470.1.S1_s_at,Dr.8198.1.A1_at                                                                                                        | Kreisl2          | Kreisl2 (mouse) maf-related leucine zipper homolog 2.2 [Source:RefSeq_peptide;Acc:NP_571917]                                                             | -273  | -255  | 1      | tcagttcactgacctc    |
| ENSDARG00000044176 | ENSDART00000064858 | Dr.23470.1.S1_s_at,Dr.8198.1.A1_at                                                                                                        | Kreisl2          | Kreisl2 (mouse) maf-related leucine zipper homolog 2.2 [Source:RefSeq_peptide;Acc:NP_571917]                                                             | -1466 | -1448 | -1     | tcagcaactctgacctc   |
| ENSDARG00000044176 | ENSDART00000064858 | Dr.14041.1.S1_at                                                                                                                          | Kreisl2          | Kreisl2 (mouse) maf-related leucine zipper homolog 2.2 [Source:RefSeq_peptide;Acc:NP_571917]                                                             | -1466 | -1448 | -1     | tcagcaactctgacctc   |
| ENSDARG00000044613 | ENSDART00000014927 | Dr.7110.1.S1_at                                                                                                                           | NP_001005976.1   | hypothetical protein LOC449803 [Source:RefSeq_peptide;Acc:NP_001005976]                                                                                  | -4747 | -4729 | 1      | aaagcaaaattgacctc   |
| ENSDARG00000044936 | ENSDART00000066051 | Dr.7110.1.S1_at                                                                                                                           | zgc:77614        | hypothetical protein LOC393868 [Source:RefSeq_peptide;Acc:NP_957188]                                                                                     | -2318 | -2300 | -1     | gcagatctgacctc      |
| ENSDARG00000044936 | ENSDART00000066051 | Dr.7110.1.S1_at                                                                                                                           | zgc:77614        | hypothetical protein LOC393868 [Source:RefSeq_peptide;Acc:NP_957188]                                                                                     | -4494 | -4476 | -1     | actggacattgaccctg   |
| ENSDARG00000045230 | ENSDART00000066506 | Dr.956.1.S1_at                                                                                                                            | NP_001002695.1   | zgc:92631 [Source:RefSeq_peptide;Acc:NP_001002695]                                                                                                       | -68   | -50   | 1      | tcggttcaattgacctc   |
